# Supplementary material for: Integrated Analysis of Single-Cell and Bulk RNA-Sequencing Reveals a Tissue-Resident Macrophage-Related Signature for Predicting Immunotherapy Response in Breast Cancer Patients
Source: Cancers (Basel). 2022 Nov 9;14(22):5506. doi: 10.3390/cancers14225506 (PMC9688720; doi:10.3390/cancers14225506)
Supplement: Supplementary file 1 [file cancers-14-05506-s001.zip]

Archive with 8 entries (8 files):
- Supplementary_materials.pdf
- Table S1.xls
- Table S2.xls
- Table S3.xls
- Table S4.xls
- Table S5.xls
- Table S6.xls
- Table S7.xlsx
