# Supplementary material for: Integrated Analysis of Single-Cell and Bulk RNA-Sequencing Reveals a Tissue-Resident Macrophage-Related Signature for Predicting Immunotherapy Response in Breast Cancer Patients
Source: Cancers (Basel). 2022 Nov 9;14(22):5506. doi: 10.3390/cancers14225506 (PMC9688720; doi:10.3390/cancers14225506)
Supplement: Supplementary file 1 [file cancers-14-05506-s001.zip › Table S1.xls]

## Sheet: Canonical marker genes
Table S1. Canonical marker genes used for cell type identification and relevant literature.
cell type	Marker gene	PMID
B cell	CD79A	16938666;7643857;15591116
	CD79B	24444466;10090943;10753858
	CD150/SLAMF1	20231852;27356578;27424222
	CD40	1698631;14676197;9366415
	CD27	31608054;7540066;10419648
	CD38	7869031;16568475;15759031
	CD23/FCER2	9250823;1532590;2137545
	JCHAIN	16688681;23897025;16048541
	IGHG	17177686;24239836;25765251
	IGHM	19776762;25057009;28063478
	IGHA2	31576494;24913324;25611855
	IGHG3	34433614;32384121;12200606
	IGHA1	8655157;32575434;25611855
	IGHG2	14678200;18213529;28137280
	CD20/MS4A1	7684739;16285718;17675267
Endothelial cell	PECAM1	15985432;26607202;7589563
	VWF	32989152;17148587;32234826
	CLDN5	20525806;28888043;30734065
Epithelial cell	KRT8	33115917;32678092;32022439
	KRT18	29402201;28475172;26960973
	KRT19	29033846;32222998;30543777
	EPCAM	32507912;33525555;33850145
Fibroblast	COL1A1	32589888;31579932;31930556
	COL1A2	33543025;28836200;26794609
	DCN	26547587;34209854;33918979
	ACTA2	29500246;27064749;34209854
	MYLK	16407417;35119478;25828392
Plasma cell	MZB1	30257949;28654764;33318509
	XBP1	32574624;30842412;19752183
T cell	CD2	10510361;7912994;11376005
	CD45/PTPRC	9429890;1531846;18981123
	CCR7	16278415;16272303;25688986
	CD62L/SELL	25822027;15234543;27183388
	CD3D	21926461;21883749;23336327
	ITGAE	30100393;33479027;33827905
	FOXP3	19117830;16617117;31778687
	CD3E	7937778;28597365;25980612
	CD4	12695117;1677023;23742646
	CD69	26100786;8566003;8702434
	CD8	10623829;3145195;23363813
	TRBC1	32333725;33049270;33673033
	TRBC2	29131157;32333725;30932962
	CD3G	29653965;2137107;14995914
Macrophage	CD68	32313727;18367204;28370718
	CD163	32397365;11865982;33936093
	MRC1	28629744;32460863;33246465
	MARCO	34626585;33293426;34644556
	APOE	30739785;28084332;32668250
	C1QA	33879890;34079754;34088779
	C1QB	33138195;34079754;21862594
	C1QC	34079754;34117085;27648858
	FOLR2	32976798;34995099;35325594
	SELENOP	33766336;32634513;19204963
	CTSB	29079517;29500339;34815788
	CTSD	30717773;30806145;31060228
	SPP1	31221805;31185211;35365629
	TREM2	33586673;33679809;33297569
	FABP5	33071982;34876574;26105806
Mast cell	CPA3	32321525;34321876;33546258
DC	BATF3	28486109;25100743;19008445
	IRF8	32735845;29925996;28090699
	CD1A	34240315;33193307;16968896
	XCR1	34389726;34017133;32788723
	LAMP3	31675496;33483337;33545035
	CLEC9A	34081922;32686767;33264090
Neutrophil	MMP9	34276694;27034404;33820675
	FCGR3B	18408222;22309893;34108956
	CD74	34540893;30968541;23776208
	S100A8/S100A9	32134742;3194136729942307
	FCN1	31245869;23944633;34143756

## Sheet: Characterize of BC samples 
Molecular characterize/ stratify of BC samples
GEO samples	ER status
GSM4909289	positive
GSM4909290	positive
GSM4909291	positive
GSM4909292	positive
GSM4909293	positive
GSM4909294	positive
GSM4909295	positive
GSM4909296	positive
GSM4909297	positive
GSM4909298	positive
GSM4909299	positive
GSM4909300	positive
GSM4909301	positive
GSM4909302	positive
GSM4909303	positive
GSM4909304	positive
GSM4909305	positive
GSM4909306	positive
GSM4909307	positive
GSM4909308	positive
GSM4909309	positive
GSM4909310	positive
GSM4909311	positive
GSM4909312	positive
GSM4909313	positive
GSM4909314	positive
GSM4909315	positive
GSM4909316	positive
GSM4909317	positive
GSM4909318	positive
GSM4909319	positive
GSM4909320	positive
GSM4909321	positive
