# Supplementary material for: Integrated Analysis of Single-Cell and Bulk RNA-Sequencing Reveals a Tissue-Resident Macrophage-Related Signature for Predicting Immunotherapy Response in Breast Cancer Patients
Source: Cancers (Basel). 2022 Nov 9;14(22):5506. doi: 10.3390/cancers14225506 (PMC9688720; doi:10.3390/cancers14225506)
Supplement: Supplementary file 1 [file cancers-14-05506-s001.zip › Table S2.xls]

## Sheet: Macrophage.markers
Table S3 Significant marker genes of macrophage subsets
p_val	avg_log2FC	pct.1	pct.2	p_val_adj	cluster	gene
2.26e-29	-2.5397	0.479	0.564	7.59e-25	RTM_1	ISG15
8.03e-80	-2.34793	0.448	0.674	2.69e-75	RTM_1	IFI6
8.44e-133	-1.95427	0.572	0.805	2.83e-128	RTM_1	RPL31
5.14e-88	-1.90799	0.126	0.49	1.72e-83	RTM_1	RPS17
1.31e-153	-1.8525	0.657	0.85	4.41e-149	RTM_1	RPL23A
4.99e-184	-1.82174	0.933	0.959	1.67e-179	RTM_1	RPL13A
1.23e-29	-1.64276	0.605	0.649	4.12e-25	RTM_1	IFITM3
1.84e-56	-1.61782	0.299	0.53	6.17e-52	RTM_1	MIF
1.74e-160	-1.60581	0.895	0.939	5.83e-156	RTM_1	RPL27A
5.74e-169	-1.5576	0.961	0.976	1.93e-164	RTM_1	RPS18
1.58e-07	-1.55401	0.284	0.337	0.00528359	RTM_1	CCL2
1.2e-60	-1.52844	0.448	0.628	4.04e-56	RTM_1	NOP10
2.54e-28	-1.52222	0.121	0.287	8.53e-24	RTM_1	MGP
1.39e-26	-1.48692	0.474	0.56	4.65e-22	RTM_1	LY6E
1.06e-39	-1.45496	0.383	0.54	3.55e-35	RTM_1	CKLF
3.4e-132	-1.38766	0.754	0.256	1.14e-127	RTM_1	IGKC
7.94e-156	-1.38594	0.91	0.935	2.66e-151	RTM_1	RPS29
1.08e-35	-1.36533	0.292	0.113	3.63e-31	RTM_1	IGLC2
2.04e-117	-1.34381	0.843	0.903	6.83e-113	RTM_1	PFN1
2.38e-33	-1.29768	0.796	0.753	7.97e-29	RTM_1	CSTB
2.31e-46	-1.29065	0.423	0.582	7.74e-42	RTM_1	SEC61G
2.46e-67	-1.28092	0.663	0.756	8.25e-63	RTM_1	COX6C
3.66e-138	-1.25767	0.999	1	1.23e-133	RTM_1	TMSB4X
7.87e-47	-1.23501	0.495	0.627	2.64e-42	RTM_1	COX6A1
3.11e-84	-1.22725	0.744	0.807	1.04e-79	RTM_1	RPL38
1.01e-69	-1.21313	0.552	0.707	3.37e-65	RTM_1	ATP5MC2
1.61e-101	-1.2094	0.854	0.886	5.4e-97	RTM_1	RPS20
1.23e-78	-1.17288	0.762	0.805	4.12e-74	RTM_1	RPL27
2.27e-32	-1.15325	0.354	0.501	7.6e-28	RTM_1	RPL36A
7.64e-52	-1.14805	0.458	0.619	2.56e-47	RTM_1	RPS10
9.19e-28	-1.13901	0.51	0.577	3.08e-23	RTM_1	POLR2L
8.98e-45	-1.12091	0.544	0.655	3.01e-40	RTM_1	TMA7
4.05e-50	-1.08587	0.663	0.714	1.36e-45	RTM_1	COX7A2
9.89e-66	-1.04925	0.83	0.823	3.32e-61	RTM_1	RPL7
5.52e-19	-1.04715	0.264	0.384	1.85e-14	RTM_1	DRAP1
2.95e-123	-1.04655	0.979	0.98	9.89e-119	RTM_1	RPS15
2.03e-62	-1.03094	0.812	0.803	6.8e-58	RTM_1	RPL10A
4.43e-81	-1.02732	0.899	0.877	1.49e-76	RTM_1	RPS25
5.69e-115	-1.02352	0.98	0.968	1.91e-110	RTM_1	RPLP2
1.92e-90	-1.02239	0.9	0.903	6.44e-86	RTM_1	RPS3
4.13e-27	-1.0086	0.34	0.478	1.39e-22	RTM_1	ZFAS1
3.2e-21	-0.99864	0.15	0.293	1.07e-16	RTM_1	KRTCAP2
4.23e-19	-0.995076	0.276	0.394	1.42e-14	RTM_1	COX17
1.42e-26	-0.987508	0.094	0.257	4.78e-22	RTM_1	RPL17
1.4e-10	-0.985865	0.605	0.577	4.69e-06	RTM_1	FABP5
9.61e-71	-0.98203	0.329	0.087	3.22e-66	RTM_1	IGHG1
6.99e-36	-0.977038	0.677	0.703	2.34e-31	RTM_1	NDUFA4
2.32e-49	-0.969932	0.981	0.936	7.8e-45	RTM_1	LGALS1
2.24e-111	-0.966222	0.973	0.962	7.53e-107	RTM_1	RPL32
2.38e-21	-0.966199	0.348	0.458	7.97e-17	RTM_1	MINOS1
4.77e-31	-0.960022	0.529	0.599	1.6e-26	RTM_1	OST4
5.23e-28	-0.951574	0.545	0.604	1.75e-23	RTM_1	COX8A
1.31e-141	-0.948609	0.99	0.994	4.4e-137	RTM_1	RPL41
1.89e-99	-0.945737	0.976	0.958	6.33e-95	RTM_1	RPL34
1.59e-114	-0.933765	0.988	0.983	5.32e-110	RTM_1	RPS19
1.2e-36	-0.931376	0.704	0.705	4.01e-32	RTM_1	UQCR11
3.22e-68	-0.928064	0.874	0.866	1.08e-63	RTM_1	RPS5
8.6e-89	-0.923496	0.974	0.949	2.88e-84	RTM_1	RPS8
9.78e-10	-0.917197	0.296	0.361	3.28e-05	RTM_1	DYNLT1
2.49e-64	-0.915638	0.829	0.817	8.37e-60	RTM_1	RPS7
2.31e-17	-0.913255	0.281	0.388	7.74e-13	RTM_1	SELENOH
2.32e-16	-0.903943	0.348	0.438	7.77e-12	RTM_1	TRMT112
8.72e-26	-0.893537	0.625	0.649	2.92e-21	RTM_1	UQCRQ
2.68e-08	-0.880195	0.257	0.317	0.000898357	RTM_1	IFITM2
4.6e-88	-0.87954	0.969	0.937	1.54e-83	RTM_1	RPS15A
7.07e-104	-0.877723	0.983	0.983	2.37e-99	RTM_1	RPS27
7.29e-69	-0.870995	0.955	0.919	2.45e-64	RTM_1	RPS6
8.07e-80	-0.867353	0.958	0.937	2.71e-75	RTM_1	RPL37A
4.24e-102	-0.866544	0.986	0.979	1.42e-97	RTM_1	RPS14
3.94e-81	-0.864043	0.989	0.967	1.32e-76	RTM_1	RPS2
2.45e-13	-0.859677	0.478	0.508	8.23e-09	RTM_1	LY96
7.83e-07	-0.847652	0.709	0.623	0.0262724	RTM_1	ALOX5AP
3.09e-15	-0.840743	0.607	0.595	1.04e-10	RTM_1	TXN
2.58e-14	-0.839621	0.373	0.448	8.66e-10	RTM_1	SNRPD2
2.26e-126	-0.827547	0.996	0.993	7.58e-122	RTM_1	RPLP1
2.43e-07	-0.822403	0.33	0.371	0.00815284	RTM_1	TIMP1
8.52e-19	-0.820789	0.48	0.543	2.86e-14	RTM_1	COMMD6
1.62e-26	-0.816361	0.746	0.709	5.43e-22	RTM_1	PSMA7
2.73e-85	-0.811991	0.971	0.944	9.15e-81	RTM_1	RPL15
3.33e-13	-0.80932	0.329	0.414	1.12e-08	RTM_1	ERH
8.86e-28	-0.807237	0.631	0.649	2.97e-23	RTM_1	CHCHD2
5.07e-49	-0.800096	0.815	0.795	1.7e-44	RTM_1	RPL24
2.91e-10	-0.799111	0.36	0.418	9.75e-06	RTM_1	SLIRP
1.7e-10	-0.79263	0.312	0.377	5.71e-06	RTM_1	NDUFA13
2.92e-14	-0.791607	0.532	0.553	9.8e-10	RTM_1	NDUFB1
6.21e-109	-0.783038	0.385	0.08	2.08e-104	RTM_1	IGHG3
9.67e-60	-0.770577	0.945	0.9	3.24e-55	RTM_1	RPL26
6.94e-48	-0.770172	0.946	0.924	2.33e-43	RTM_1	FCER1G
3.27e-17	-0.768242	0.642	0.617	1.1e-12	RTM_1	ATP5MPL
4.15e-56	-0.762589	0.946	0.912	1.39e-51	RTM_1	RPS16
4.32e-38	-0.761454	0.84	0.798	1.45e-33	RTM_1	COX7C
2.12e-09	-0.757682	0.305	0.364	7.1e-05	RTM_1	NDUFB9
1.33e-14	-0.757345	0.616	0.612	4.47e-10	RTM_1	RBX1
3.21e-10	-0.753172	0.526	0.521	1.08e-05	RTM_1	NDUFA1
1.13e-15	-0.749666	0.557	0.567	3.78e-11	RTM_1	ATP5MC3
3.2e-51	-0.748896	0.911	0.856	1.07e-46	RTM_1	RPL35A
5.93e-15	-0.745743	0.67	0.631	1.99e-10	RTM_1	ATP5ME
6.86e-30	-0.743404	0.761	0.727	2.3e-25	RTM_1	ATP5MG
2.05e-16	-0.739544	0.716	0.674	6.86e-12	RTM_1	MYL12A
1.37e-62	-0.738618	0.984	0.951	4.58e-58	RTM_1	RPL12
1.4e-08	-0.735605	0.416	0.442	0.000468139	RTM_1	ANAPC11
5.68e-10	-0.735419	0.734	0.663	1.91e-05	RTM_1	RPS27L
6.05e-08	-0.728611	0.318	0.37	0.00202747	RTM_1	ROMO1
8.28e-90	-0.727851	0.994	0.991	2.78e-85	RTM_1	RPL10
7.52e-65	-0.724916	0.955	0.936	2.52e-60	RTM_1	RPS27A
1.65e-10	-0.724761	0.6	0.577	5.52e-06	RTM_1	BST2
3.86e-86	-0.724676	0.985	0.963	1.3e-81	RTM_1	RPS28
2.92e-30	-0.722856	0.803	0.77	9.8e-26	RTM_1	PPIA
5.83e-51	-0.722725	0.963	0.933	1.95e-46	RTM_1	RPL35
1.15e-10	-0.721324	0.246	0.33	3.85e-06	RTM_1	PFDN2
2.01e-60	-0.718608	0.975	0.941	6.73e-56	RTM_1	RPS4X
1.7e-49	-0.713915	0.964	0.922	5.69e-45	RTM_1	RPL21
1.03e-26	-0.70407	0.781	0.729	3.47e-22	RTM_1	RPSA
1.9e-10	-0.700171	0.218	0.305	6.37e-06	RTM_1	SFT2D1
4.9e-10	-0.698784	0.298	0.365	1.64e-05	RTM_1	MYDGF
2.83e-46	-0.697991	0.97	0.924	9.49e-42	RTM_1	RPL18A
7.41e-35	-0.696273	0.875	0.816	2.49e-30	RTM_1	RPLP0
3.09e-26	-0.694491	0.823	0.785	1.04e-21	RTM_1	CALM2
3.86e-09	-0.693937	0.244	0.322	0.000129573	RTM_1	SNRPF
1.42e-29	-0.693048	0.868	0.77	4.75e-25	RTM_1	RPL23
2.95e-59	-0.6902	0.95	0.939	9.9e-55	RTM_1	RPL8
1.27e-07	-0.681696	0.322	0.373	0.00427128	RTM_1	TRAPPC1
3.01e-08	-0.681578	0.434	0.457	0.00100967	RTM_1	COPS9
2.7e-08	-0.677481	0.259	0.326	0.000904586	RTM_1	SNRPD1
8.33e-65	-0.674822	0.97	0.949	2.79e-60	RTM_1	RPL11
3.45e-09	-0.671399	0.597	0.562	0.000115788	RTM_1	PPIB
1.21e-55	-0.651627	0.983	0.963	4.06e-51	RTM_1	SERF2
2.06e-63	-0.649355	0.979	0.957	6.92e-59	RTM_1	RPL19
2.56e-58	-0.642593	0.994	0.962	8.59e-54	RTM_1	RPL39
6.65e-65	-0.634387	0.991	0.976	2.23e-60	RTM_1	PTMA
2.58e-07	-0.627083	0.405	0.438	0.00866498	RTM_1	LAMTOR5
2.62e-09	-0.626071	0.565	0.541	8.79e-05	RTM_1	SLC25A6
2.01e-52	-0.625695	0.974	0.947	6.75e-48	RTM_1	ATP5F1E
4.63e-08	-0.623234	0.177	0.251	0.00155321	RTM_1	KRT10
5.91e-48	-0.616434	0.955	0.912	1.98e-43	RTM_1	OAZ1
2e-07	-0.610514	0.581	0.538	0.00672421	RTM_1	SUB1
6.33e-12	-0.602978	0.713	0.648	2.12e-07	RTM_1	DBI
2.35e-10	-0.60042	0.57	0.558	7.87e-06	RTM_1	SEC61B
2.23e-12	-0.595372	0.764	0.684	7.48e-08	RTM_1	UQCR10
1.03e-16	-0.593285	0.752	0.69	3.46e-12	RTM_1	COX6B1
1.19e-23	-0.591664	0.908	0.85	4e-19	RTM_1	SH3BGRL3
8.79e-17	-0.591143	0.773	0.717	2.95e-12	RTM_1	EEF1D
1.8e-51	-0.587885	0.995	0.967	6.04e-47	RTM_1	RPL13
5.15e-40	-0.578074	0.965	0.908	1.73e-35	RTM_1	RPL36
2.26e-48	-0.573288	0.956	0.933	7.57e-44	RTM_1	FAU
3.81e-12	-0.572164	0.741	0.677	1.28e-07	RTM_1	ELOB
5.82e-11	-0.560964	0.732	0.659	1.95e-06	RTM_1	COX5B
6.05e-40	-0.558691	0.976	0.933	2.03e-35	RTM_1	RPS23
7.51e-29	-0.550276	0.961	0.892	2.52e-24	RTM_1	RPS13
2.87e-61	-0.542432	0.999	0.997	9.64e-57	RTM_1	TMSB10
6.04e-17	-0.527984	0.879	0.757	2.03e-12	RTM_1	RPS21
1.43e-07	-0.521329	0.727	0.634	0.00480236	RTM_1	UBL5
2.42e-18	-0.517618	0.858	0.779	8.11e-14	RTM_1	YBX1
2.09e-26	-0.509308	0.994	0.972	7.02e-22	RTM_1	TYROBP
2.53e-24	-0.506682	0.954	0.87	8.49e-20	RTM_1	RPS11
2.23e-18	-0.506397	0.865	0.789	7.48e-14	RTM_1	COX4I1
7.18e-07	-0.500274	0.641	0.577	0.024074	RTM_1	UQCRH
9.88e-40	0.501439	0.297	0.109	3.31e-35	RTM_1	NR4A3
1.14e-38	0.501545	0.409	0.184	3.83e-34	RTM_1	RASGEF1B
1.79e-34	0.503782	0.453	0.229	6e-30	RTM_1	NABP1
1.06e-44	0.504519	0.325	0.12	3.56e-40	RTM_1	TAGAP
2.01e-55	0.505996	0.595	0.274	6.74e-51	RTM_1	SERPINF1
8.03e-53	0.508181	0.4	0.154	2.69e-48	RTM_1	PLBD1
2.71e-52	0.510876	0.3	0.094	9.09e-48	RTM_1	GPR155
3.48e-48	0.512171	0.808	0.459	1.17e-43	RTM_1	CYBB
1.66e-34	0.513612	0.308	0.129	5.57e-30	RTM_1	HBEGF
2.94e-46	0.516997	0.617	0.321	9.86e-42	RTM_1	RNF13
3.48e-42	0.520177	0.293	0.105	1.17e-37	RTM_1	MXD1
5.9e-41	0.520586	0.48	0.231	1.98e-36	RTM_1	CDKN1A
9.47e-09	0.521578	0.344	0.242	0.000317462	RTM_1	IL1B
1.57e-45	0.525209	0.809	0.463	5.26e-41	RTM_1	RTN4
1.4e-52	0.527169	0.716	0.382	4.69e-48	RTM_1	ADAP2
2.24e-54	0.533293	0.517	0.231	7.51e-50	RTM_1	PEA15
2.9e-72	0.537008	0.506	0.187	9.71e-68	RTM_1	FUCA1
9.63e-55	0.537368	0.673	0.346	3.23e-50	RTM_1	LAIR1
7.95e-43	0.537453	0.292	0.103	2.67e-38	RTM_1	MAFF
1.49e-48	0.537565	0.512	0.235	5.01e-44	RTM_1	FCGR2B
4.64e-53	0.537747	0.923	0.568	1.56e-48	RTM_1	ITGB2
2.31e-94	0.539887	0.999	0.956	7.75e-90	RTM_1	HLA-B
6.34e-52	0.540362	0.83	0.487	2.13e-47	RTM_1	CTSC
5.64e-46	0.54142	0.355	0.139	1.89e-41	RTM_1	ATP6V0A1
7.38e-62	0.54307	0.439	0.16	2.48e-57	RTM_1	SELPLG
1.41e-45	0.543135	0.454	0.205	4.72e-41	RTM_1	EIF4A3
8.16e-57	0.543645	0.413	0.156	2.74e-52	RTM_1	GNPTAB
2.33e-56	0.54456	0.439	0.174	7.81e-52	RTM_1	IQGAP2
1.54e-58	0.544867	0.32	0.098	5.17e-54	RTM_1	TANC2
2.51e-51	0.547635	0.657	0.339	8.42e-47	RTM_1	SNX6
1.96e-49	0.547877	0.254	0.074	6.57e-45	RTM_1	TFDP2
1.77e-71	0.548405	0.994	0.812	5.93e-67	RTM_1	VIM
3.43e-54	0.548709	0.387	0.144	1.15e-49	RTM_1	GOLGB1
2.46e-54	0.55262	0.579	0.274	8.26e-50	RTM_1	ADA2
3.35e-57	0.554736	0.5	0.208	1.12e-52	RTM_1	DSE
1.09e-51	0.555336	0.631	0.317	3.65e-47	RTM_1	HCLS1
1.26e-55	0.557912	0.516	0.219	4.23e-51	RTM_1	NCF1
1.15e-50	0.558535	0.564	0.265	3.85e-46	RTM_1	ARL4C
3.87e-35	0.562026	0.368	0.165	1.3e-30	RTM_1	GADD45G
3.22e-33	0.565682	0.869	0.639	1.08e-28	RTM_1	KLF6
8.26e-63	0.566281	0.443	0.165	2.77e-58	RTM_1	PLXNC1
5.68e-61	0.568071	0.599	0.27	1.91e-56	RTM_1	GM2A
1.19e-76	0.568329	0.325	0.079	4e-72	RTM_1	TLR7
9.98e-45	0.573504	0.281	0.092	3.35e-40	RTM_1	TMIGD3
5.21e-36	0.575099	0.389	0.179	1.75e-31	RTM_1	AC020916.1
1.46e-64	0.576093	0.556	0.224	4.91e-60	RTM_1	STAB1
5.44e-50	0.576369	0.576	0.283	1.83e-45	RTM_1	NFE2L2
1.27e-67	0.577484	0.685	0.314	4.27e-63	RTM_1	LGALS3BP
1.31e-70	0.578499	0.849	0.443	4.38e-66	RTM_1	MSR1
6.2e-47	0.581494	0.627	0.329	2.08e-42	RTM_1	EGR1
2.53e-67	0.581679	0.693	0.326	8.48e-63	RTM_1	CXCL16
4.29e-53	0.583678	0.825	0.488	1.44e-48	RTM_1	CTSH
5.37e-59	0.584089	0.718	0.361	1.8e-54	RTM_1	AHNAK
6.63e-63	0.586115	0.318	0.093	2.22e-58	RTM_1	SIGLEC10
7.32e-54	0.586534	0.827	0.488	2.45e-49	RTM_1	FYB1
8.24e-68	0.587951	0.418	0.142	2.77e-63	RTM_1	ABCC3
1.9e-59	0.598063	0.766	0.412	6.36e-55	RTM_1	KCTD12
1.63e-48	0.599699	0.724	0.409	5.45e-44	RTM_1	GADD45B
1.32e-54	0.608853	0.744	0.405	4.42e-50	RTM_1	RHOB
3.6e-56	0.612562	0.853	0.511	1.21e-51	RTM_1	GNAI2
7.38e-57	0.612865	0.384	0.137	2.48e-52	RTM_1	PFKFB3
2.03e-50	0.614601	0.676	0.358	6.79e-46	RTM_1	PPP1R15A
1.62e-66	0.622651	0.716	0.337	5.43e-62	RTM_1	MT-ND4L
2.2e-66	0.622666	0.657	0.307	7.38e-62	RTM_1	PLTP
3.15e-65	0.622693	0.41	0.144	1.06e-60	RTM_1	CIITA
2.32e-64	0.624725	0.914	0.566	7.79e-60	RTM_1	GPNMB
2.38e-63	0.633082	0.774	0.403	7.98e-59	RTM_1	PPT1
7.15e-65	0.636102	0.465	0.177	2.4e-60	RTM_1	ITGAV
2.85e-48	0.644708	0.475	0.211	9.55e-44	RTM_1	ICAM1
3.54e-70	0.646334	0.552	0.219	1.19e-65	RTM_1	CPM
7.71e-79	0.646718	0.979	0.677	2.59e-74	RTM_1	MT-ND5
6.8e-63	0.650328	0.504	0.204	2.28e-58	RTM_1	SPRED1
2.34e-67	0.651412	0.464	0.175	7.84e-63	RTM_1	GOLGA4
4.83e-64	0.652484	0.426	0.154	1.62e-59	RTM_1	DST
3.97e-59	0.653516	0.55	0.237	1.33e-54	RTM_1	IER5
1.55e-67	0.656049	0.502	0.188	5.21e-63	RTM_1	SLC40A1
2.65e-79	0.660228	0.601	0.241	8.89e-75	RTM_1	SLC15A3
9.28e-49	0.66058	0.625	0.325	3.11e-44	RTM_1	REL
7.73e-64	0.663574	0.848	0.501	2.59e-59	RTM_1	RNASE1
1.32e-68	0.670604	0.943	0.7	4.42e-64	RTM_1	DUSP1
3.11e-76	0.671913	0.554	0.215	1.04e-71	RTM_1	ALCAM
7.69e-51	0.673604	0.67	0.356	2.58e-46	RTM_1	LMNA
6.08e-80	0.674438	0.435	0.136	2.04e-75	RTM_1	ALDH1A1
6.94e-70	0.6819	0.862	0.484	2.33e-65	RTM_1	XIST
8.47e-68	0.682572	0.519	0.205	2.84e-63	RTM_1	ELL2
1.17e-71	0.683892	0.5	0.188	3.93e-67	RTM_1	PMP22
2.9e-75	0.683904	0.466	0.164	9.72e-71	RTM_1	SLAMF8
1.67e-44	0.705483	0.499	0.241	5.59e-40	RTM_1	IRF1
7.31e-71	0.707915	0.915	0.568	2.45e-66	RTM_1	TXNIP
8.48e-37	0.721431	0.315	0.127	2.84e-32	RTM_1	HSPA6
1.11e-91	0.725386	0.339	0.074	3.73e-87	RTM_1	HLA-DQB2
1.26e-71	0.726281	0.857	0.486	4.24e-67	RTM_1	LITAF
1.74e-62	0.72693	0.822	0.471	5.84e-58	RTM_1	HERPUD1
2.17e-65	0.728063	0.411	0.141	7.29e-61	RTM_1	INSIG1
3.96e-131	0.728363	1	0.97	1.33e-126	RTM_1	CD74
3.73e-47	0.730684	0.577	0.294	1.25e-42	RTM_1	HSPD1
8.55e-54	0.73599	0.369	0.135	2.87e-49	RTM_1	TSC22D1
3.01e-86	0.736795	0.585	0.222	1.01e-81	RTM_1	CPVL
1.62e-82	0.740667	0.738	0.337	5.44e-78	RTM_1	PLXDC2
8.87e-87	0.740995	0.373	0.097	2.97e-82	RTM_1	GPX3
1.02e-55	0.742695	0.45	0.187	3.41e-51	RTM_1	TFRC
7.32e-69	0.746912	0.37	0.117	2.45e-64	RTM_1	FAM129A
9.94e-84	0.754756	0.501	0.166	3.33e-79	RTM_1	HLA-DQA2
7.29e-42	0.757967	0.271	0.094	2.45e-37	RTM_1	PCNX4
3.01e-44	0.759249	0.766	0.485	1.01e-39	RTM_1	HNRNPU
1.42e-51	0.762248	0.892	0.655	4.75e-47	RTM_1	JUN
7.7e-93	0.774881	0.954	0.638	2.58e-88	RTM_1	CTSS
5.29e-150	0.775621	1	0.998	1.77e-145	RTM_1	MT-CO1
1.84e-74	0.780224	0.756	0.374	6.18e-70	RTM_1	OLR1
5.16e-93	0.780251	0.747	0.316	1.73e-88	RTM_1	FGL2
9.36e-73	0.78149	0.686	0.32	3.14e-68	RTM_1	HSPA5
1.65e-69	0.784668	0.565	0.246	5.53e-65	RTM_1	MAP3K2
9.74e-98	0.791037	0.692	0.277	3.27e-93	RTM_1	C3AR1
4.37e-81	0.79616	0.607	0.254	1.47e-76	RTM_1	LHFPL2
3.32e-80	0.811009	0.55	0.209	1.11e-75	RTM_1	C5AR1
8.5e-97	0.818832	0.49	0.148	2.85e-92	RTM_1	MRC1
7.8e-101	0.818936	0.969	0.693	2.62e-96	RTM_1	GLUL
1.06e-85	0.826486	0.703	0.318	3.55e-81	RTM_1	RASSF4
7.58e-59	0.829503	0.708	0.38	2.54e-54	RTM_1	ACP5
3.44e-61	0.831109	0.651	0.337	1.16e-56	RTM_1	TNFAIP3
3.64e-98	0.843452	0.709	0.301	1.22e-93	RTM_1	AKR1B1
2e-151	0.851854	1	0.996	6.7e-147	RTM_1	MT-CO3
3.2e-103	0.85759	0.611	0.221	1.07e-98	RTM_1	GAA
3.68e-66	0.862936	0.618	0.291	1.23e-61	RTM_1	HSPH1
2.95e-101	0.865506	0.875	0.461	9.89e-97	RTM_1	HLA-DMB
1.1e-73	0.870442	0.511	0.194	3.69e-69	RTM_1	SLC2A3
1.58e-116	0.873534	0.983	0.733	5.3e-112	RTM_1	C1QB
1.67e-106	0.874101	0.935	0.584	5.59e-102	RTM_1	CD81
5.67e-126	0.874377	0.993	0.792	1.9e-121	RTM_1	HLA-DPB1
6.94e-124	0.882053	0.999	0.793	2.33e-119	RTM_1	HLA-DPA1
1.99e-101	0.884692	0.996	0.848	6.69e-97	RTM_1	CTSD
3.71e-100	0.887048	0.744	0.322	1.24e-95	RTM_1	SLCO2B1
1.05e-99	0.897176	0.991	0.923	3.52e-95	RTM_1	NEAT1
3.18e-172	0.905614	1	0.982	1.07e-167	RTM_1	MT-ND4
5.62e-110	0.913397	0.958	0.634	1.88e-105	RTM_1	HLA-DQB1
6.05e-74	0.91635	0.978	0.846	2.03e-69	RTM_1	HSP90AA1
2.8e-119	0.918861	0.975	0.731	9.38e-115	RTM_1	UBC
3.38e-106	0.922294	0.54	0.164	1.13e-101	RTM_1	KLF2
4.41e-86	0.925451	0.642	0.274	1.48e-81	RTM_1	CHMP1B
4.63e-121	0.936621	0.757	0.291	1.55e-116	RTM_1	TMEM176A
2.51e-167	0.937523	0.994	0.887	8.4e-163	RTM_1	TPT1
1.49e-67	0.940484	0.895	0.653	4.98e-63	RTM_1	HSPA1A
3.86e-128	0.94176	0.99	0.779	1.29e-123	RTM_1	C1QA
1.96e-110	0.943087	0.677	0.26	6.57e-106	RTM_1	ALDH2
4.21e-123	0.948873	0.564	0.171	1.41e-118	RTM_1	HLA-DOA
6.63e-80	0.950273	0.798	0.435	2.22e-75	RTM_1	ZFAND5
1.55e-72	0.961247	0.792	0.446	5.19e-68	RTM_1	DNAJB1
8.96e-80	0.966491	0.65	0.29	3e-75	RTM_1	ATF3
1.84e-83	0.970193	0.742	0.376	6.17e-79	RTM_1	CD83
8.62e-94	0.994566	0.468	0.133	2.89e-89	RTM_1	CXCL9
1.94e-132	1.00559	0.994	0.836	6.5e-128	RTM_1	CTSB
8.77e-120	1.01628	0.59	0.192	2.94e-115	RTM_1	KCNMA1
3.5e-141	1.03946	0.955	0.45	1.17e-136	RTM_1	HLA-DRB5
5.55e-172	1.07274	0.999	0.929	1.86e-167	RTM_1	MT-CYB
3.33e-187	1.07479	0.996	0.924	1.12e-182	RTM_1	MT-ND1
6.25e-149	1.07682	0.734	0.242	2.1e-144	RTM_1	SERPING1
1.75e-105	1.07757	0.86	0.468	5.87e-101	RTM_1	FOSB
1.88e-177	1.07876	1	0.934	6.29e-173	RTM_1	HLA-DRA
4.22e-81	1.09273	0.791	0.436	1.41e-76	RTM_1	IER3
1.25e-114	1.0937	0.796	0.365	4.18e-110	RTM_1	NAMPT
2.83e-174	1.10198	1	0.906	9.5e-170	RTM_1	MT-ND3
8.42e-145	1.1035	0.976	0.708	2.82e-140	RTM_1	CTSZ
6.03e-90	1.11341	0.493	0.169	2.02e-85	RTM_1	RANBP2
1.96e-128	1.11478	0.84	0.394	6.57e-124	RTM_1	A2M
1.18e-131	1.1205	0.865	0.414	3.97e-127	RTM_1	FCGR2A
4.34e-175	1.15027	0.683	0.183	1.46e-170	RTM_1	C2
2.85e-158	1.16193	0.739	0.248	9.55e-154	RTM_1	MTRNR2L12
1.02e-112	1.17848	0.784	0.381	3.42e-108	RTM_1	NR4A2
2.91e-163	1.18907	0.883	0.355	9.76e-159	RTM_1	TMEM176B
3.65e-160	1.19588	0.862	0.346	1.22e-155	RTM_1	CFD
6.47e-115	1.20413	0.651	0.24	2.17e-110	RTM_1	ZNF331
1.75e-132	1.22223	0.804	0.361	5.87e-128	RTM_1	ATP1B3
1.15e-171	1.22577	0.984	0.599	3.84e-167	RTM_1	LYZ
8.49e-167	1.22931	0.979	0.6	2.85e-162	RTM_1	HLA-DQA1
1.91e-161	1.39434	0.91	0.447	6.42e-157	RTM_1	SOD2
6.48e-229	1.39964	1	0.933	2.17e-224	RTM_1	MT-ATP6
8.06e-256	1.71513	0.96	0.423	2.7e-251	RTM_1	FCGR3A
0	2.16046	0.919	0.246	0	RTM_1	MTRNR2L8
p_val	avg_log2FC	pct.1	pct.2	p_val_adj	cluster	gene
4.24e-31	-2.81677	0.414	0.565	1.42e-26	RTM_2	ISG15
4.48e-09	-2.12399	0.25	0.134	0.000150179	RTM_2	IGLC2
1.85e-25	-1.92336	0.59	0.636	6.21e-21	RTM_2	IFI6
4.59e-31	-1.72604	0.541	0.654	1.54e-26	RTM_2	IFITM3
4.45e-26	-1.54584	0.066	0.28	1.49e-21	RTM_2	MGP
1.08e-43	-1.47031	0.742	0.762	3.63e-39	RTM_2	RPL31
6.98e-14	-1.44677	0.537	0.544	2.34e-09	RTM_2	LY6E
3.32e-21	-1.38542	0.299	0.436	1.11e-16	RTM_2	RPS17
8.1e-113	-1.34738	0.998	1	2.72e-108	RTM_2	TMSB4X
1.92e-59	-1.32785	0.951	0.954	6.44e-55	RTM_2	RPL13A
4.99e-21	-1.32254	0.268	0.421	1.67e-16	RTM_2	MEF2C
6.74e-31	-1.31911	0.338	0.547	2.26e-26	RTM_2	HSPA1B
1.53e-13	-1.26665	0.488	0.513	5.12e-09	RTM_2	CKLF
2.92e-22	-1.26628	0.082	0.271	9.8e-18	RTM_2	HTRA1
1.41e-12	-1.22749	0.145	0.269	4.74e-08	RTM_2	SDS
1.22e-06	-1.21705	0.254	0.336	0.0409657	RTM_2	CCL2
4.31e-53	-1.19456	0.947	0.928	1.45e-48	RTM_2	RPL27A
2.06e-19	-1.16622	0.594	0.646	6.89e-15	RTM_2	ALOX5AP
1.79e-20	-1.15124	0.17	0.356	5.99e-16	RTM_2	C3
7.07e-20	-1.10565	0.484	0.565	2.37e-15	RTM_2	TREM2
1.06e-13	-1.10198	0.455	0.521	3.55e-09	RTM_2	DNAJB1
1.6e-30	-1.08325	0.85	0.807	5.37e-26	RTM_2	RPL23A
5.77e-27	-1.07958	0.641	0.707	1.94e-22	RTM_2	HSPA1A
2.57e-27	-1.07677	0.73	0.725	8.61e-23	RTM_2	HSPB1
4.11e-09	-1.06183	0.234	0.315	0.000137733	RTM_2	IFITM2
1.94e-46	-1.04081	0.984	0.972	6.51e-42	RTM_2	RPS18
2.16e-08	-0.976679	0.318	0.371	0.000723212	RTM_2	CORO1A
9.44e-09	-0.967304	0.367	0.42	0.0003165	RTM_2	ZFP36
1.98e-15	-0.93212	0.748	0.708	6.64e-11	RTM_2	RGS1
1.97e-17	-0.905497	0.709	0.7	6.6e-13	RTM_2	JUN
1.04e-13	-0.899181	0.607	0.595	3.49e-09	RTM_2	ID2
9.22e-35	-0.873545	0.906	0.876	3.09e-30	RTM_2	RPS20
4.1e-13	-0.834901	0.816	0.728	1.37e-08	RTM_2	COX6C
2.78e-10	-0.804366	0.512	0.576	9.33e-06	RTM_2	RNASE1
1.47e-11	-0.793137	0.748	0.675	4.93e-07	RTM_2	KLF6
3.3e-20	-0.755931	0.83	0.85	1.11e-15	RTM_2	FOS
1.26e-14	-0.753667	0.615	0.612	4.21e-10	RTM_2	MS4A7
1.34e-06	-0.751965	0.225	0.297	0.044974	RTM_2	STAB1
7.03e-11	-0.749888	0.76	0.69	2.36e-06	RTM_2	NDUFA4
3.18e-17	-0.73443	0.848	0.79	1.07e-12	RTM_2	RPL27
2.23e-10	-0.715543	0.512	0.57	7.49e-06	RTM_2	LGMN
3.89e-16	-0.714011	0.861	0.786	1.31e-11	RTM_2	RPL38
4.39e-19	-0.705744	0.848	0.785	1.47e-14	RTM_2	CALM2
2.53e-41	-0.694551	0.988	0.984	8.49e-37	RTM_2	RPS19
1.83e-08	-0.680953	0.727	0.638	0.000615244	RTM_2	YWHAH
1.06e-11	-0.645831	0.945	0.884	3.56e-07	RTM_2	PFN1
4.17e-27	-0.643618	0.986	0.979	1.4e-22	RTM_2	RPS15
3.3e-12	-0.638867	0.955	0.944	1.11e-07	RTM_2	LGALS1
6.11e-26	-0.631032	0.955	0.937	2.05e-21	RTM_2	RPL35
1.81e-14	-0.626334	0.801	0.718	6.08e-10	RTM_2	EEF1D
9.74e-22	-0.619635	0.898	0.852	3.27e-17	RTM_2	AIF1
5.43e-17	-0.603939	0.959	0.926	1.82e-12	RTM_2	RPS29
4.95e-14	-0.598801	0.92	0.876	1.66e-09	RTM_2	RPS25
1.98e-21	-0.586827	0.947	0.923	6.62e-17	RTM_2	RPS6
1.07e-13	-0.546258	0.914	0.861	3.59e-09	RTM_2	RPS5
8.78e-27	-0.542629	0.992	0.975	2.95e-22	RTM_2	TYROBP
5.87e-08	-0.537965	0.807	0.739	0.00196782	RTM_2	DUSP1
4.95e-30	0.50043	0.674	0.353	1.66e-25	RTM_2	HSPA5
4.65e-59	0.504808	0.359	0.091	1.56e-54	RTM_2	GK
8.85e-36	0.510394	0.781	0.412	2.97e-31	RTM_2	ACTR3
9.07e-23	0.512065	0.881	0.603	3.04e-18	RTM_2	TXNIP
2.64e-40	0.514487	0.803	0.417	8.86e-36	RTM_2	TAGLN2
3.31e-25	0.519161	0.506	0.255	1.11e-20	RTM_2	IL18
1.12e-36	0.52047	0.291	0.092	3.76e-32	RTM_2	BNIP3
1.81e-25	0.52154	0.984	0.905	6.06e-21	RTM_2	HLA-DRB1
4.87e-31	0.531059	0.871	0.559	1.63e-26	RTM_2	UQCRB
8.61e-16	0.532088	0.754	0.494	2.89e-11	RTM_2	MT2A
4.16e-14	0.540816	0.773	0.557	1.4e-09	RTM_2	FABP5
3e-44	0.541799	0.76	0.363	1e-39	RTM_2	MT-ND4L
5.03e-48	0.542403	0.568	0.225	1.69e-43	RTM_2	NCF2
5.01e-57	0.545578	0.613	0.228	1.68e-52	RTM_2	VAMP5
3.12e-45	0.548606	0.67	0.298	1.05e-40	RTM_2	PLEKHO1
1.41e-42	0.548677	0.652	0.296	4.73e-38	RTM_2	SERPINB1
7.02e-36	0.550988	0.252	0.072	2.36e-31	RTM_2	RARRES1
1.95e-58	0.554154	0.484	0.156	6.53e-54	RTM_2	DRAM1
9.25e-22	0.574021	1	0.999	3.1e-17	RTM_2	FTH1
1.12e-85	0.577595	0.348	0.063	3.77e-81	RTM_2	IL18BP
1.83e-18	0.578072	0.742	0.528	6.15e-14	RTM_2	CTSC
2.48e-42	0.578411	0.773	0.394	8.33e-38	RTM_2	ATP6AP2
4.23e-54	0.580031	0.486	0.164	1.42e-49	RTM_2	TAP1
1.08e-32	0.581713	0.984	0.893	3.62e-28	RTM_2	GAPDH
4.86e-50	0.585758	0.627	0.256	1.63e-45	RTM_2	FLNA
9.02e-62	0.586634	0.555	0.19	3.02e-57	RTM_2	RALA
9.28e-50	0.586765	0.328	0.09	3.11e-45	RTM_2	TREM1
8.32e-41	0.588922	0.836	0.47	2.79e-36	RTM_2	MGST3
5.64e-48	0.593423	0.463	0.164	1.89e-43	RTM_2	GBP4
7.82e-58	0.595813	0.58	0.212	2.62e-53	RTM_2	RAB13
2.52e-48	0.597863	0.393	0.125	8.47e-44	RTM_2	ADAMDEC1
1e-52	0.598569	0.73	0.321	3.36e-48	RTM_2	RAP1B
1.5e-39	0.603343	0.965	0.733	5.05e-35	RTM_2	CTSZ
1.8e-49	0.604481	0.295	0.077	6.02e-45	RTM_2	SLAMF7
9.23e-36	0.60523	0.449	0.185	3.1e-31	RTM_2	CCL5
7.85e-63	0.608599	0.447	0.13	2.63e-58	RTM_2	CD40
1.09e-48	0.615808	0.998	0.998	3.67e-44	RTM_2	MT-CO2
1.52e-49	0.629304	0.998	0.996	5.11e-45	RTM_2	MT-CO3
2.52e-47	0.635754	0.926	0.497	8.46e-43	RTM_2	HLA-DRB5
2.74e-54	0.648218	0.758	0.347	9.19e-50	RTM_2	VDAC1
4.16e-37	0.650772	0.84	0.515	1.39e-32	RTM_2	CTSH
2.06e-35	0.65594	0.932	0.722	6.91e-31	RTM_2	GLUL
3.23e-45	0.657695	0.99	0.915	1.08e-40	RTM_2	MT-ND3
2.26e-52	0.659841	0.402	0.124	7.57e-48	RTM_2	IL32
9.44e-56	0.664382	0.266	0.056	3.17e-51	RTM_2	HK2
3.95e-56	0.675056	0.32	0.078	1.32e-51	RTM_2	IL7R
8.78e-61	0.685191	0.998	0.998	2.95e-56	RTM_2	MT-CO1
2.33e-44	0.689656	0.68	0.313	7.81e-40	RTM_2	CLEC2B
1.5e-41	0.693718	0.803	0.476	5.04e-37	RTM_2	STAT1
3.19e-38	0.699752	0.984	0.851	1.07e-33	RTM_2	CTSB
2.67e-67	0.705231	0.998	0.984	8.96e-63	RTM_2	MT-ND4
1.65e-38	0.711012	0.85	0.495	5.52e-34	RTM_2	SOD2
2.01e-32	0.713187	0.486	0.216	6.74e-28	RTM_2	SCD
8.6e-68	0.719315	0.355	0.081	2.88e-63	RTM_2	CD24
6.04e-52	0.721842	0.549	0.207	2.02e-47	RTM_2	BCL2A1
6.5e-76	0.724839	0.566	0.176	2.18e-71	RTM_2	SLAMF8
6.37e-32	0.730785	0.715	0.387	2.14e-27	RTM_2	PLEK
1.32e-66	0.731305	0.789	0.339	4.41e-62	RTM_2	LCP1
3.92e-53	0.732166	0.949	0.707	1.32e-48	RTM_2	MT-ND5
3.66e-55	0.732714	0.992	0.936	1.23e-50	RTM_2	MT-CYB
3.8e-51	0.741361	0.943	0.667	1.28e-46	RTM_2	CTSS
4.05e-62	0.749226	0.533	0.181	1.36e-57	RTM_2	BCAT1
4.2e-53	0.754898	0.615	0.252	1.41e-48	RTM_2	BASP1
3.74e-53	0.766582	0.77	0.373	1.25e-48	RTM_2	LILRB4
1.28e-64	0.777747	0.691	0.282	4.29e-60	RTM_2	SERPINA1
1.85e-50	0.778463	0.861	0.483	6.19e-46	RTM_2	CD44
1.74e-56	0.783487	0.723	0.347	5.85e-52	RTM_2	LAP3
2.22e-81	0.787379	0.594	0.182	7.44e-77	RTM_2	ATF5
1.91e-55	0.794992	0.848	0.466	6.4e-51	RTM_2	PGK1
1e-40	0.805692	0.877	0.601	3.37e-36	RTM_2	GPNMB
3.52e-49	0.812406	0.895	0.558	1.18e-44	RTM_2	LGALS3
1.95e-80	0.818162	0.377	0.08	6.52e-76	RTM_2	GBP5
1.13e-88	0.828838	0.303	0.046	3.8e-84	RTM_2	MUCL1
5.2e-13	0.836734	0.385	0.213	1.74e-08	RTM_2	MT1X
4.28e-64	0.848972	0.996	0.939	1.44e-59	RTM_2	MT-ATP6
5.85e-51	0.88879	0.873	0.515	1.96e-46	RTM_2	C15orf48
1.59e-58	0.89022	0.836	0.42	5.35e-54	RTM_2	ANXA1
8.18e-70	0.895783	0.764	0.33	2.74e-65	RTM_2	TMEM176A
1.27e-64	0.899527	0.568	0.204	4.26e-60	RTM_2	LTA4H
1.9e-68	0.905481	0.85	0.461	6.36e-64	RTM_2	BRI3
2.84e-66	0.92714	0.654	0.252	9.52e-62	RTM_2	AC020656.1
2.97e-61	0.940637	0.953	0.636	9.97e-57	RTM_2	HLA-DQA1
1.92e-68	0.94857	0.959	0.781	6.44e-64	RTM_2	PRDX1
4.12e-66	0.958815	0.309	0.064	1.38e-61	RTM_2	CXCL11
1.7e-100	0.964276	0.572	0.151	5.7e-96	RTM_2	NR1H3
2.99e-93	0.965397	0.49	0.12	1e-88	RTM_2	WARS
5.59e-90	0.96674	0.502	0.127	1.88e-85	RTM_2	ERO1A
8.39e-79	0.985612	0.865	0.402	2.82e-74	RTM_2	TMEM176B
9.31e-95	1.03111	0.957	0.594	3.12e-90	RTM_2	ITGB2
1.49e-87	1.10304	0.715	0.256	4.98e-83	RTM_2	IL4I1
3.69e-79	1.11189	0.773	0.349	1.24e-74	RTM_2	SNX10
1.09e-83	1.11287	0.615	0.204	3.67e-79	RTM_2	PPA1
3.52e-81	1.22563	0.871	0.463	1.18e-76	RTM_2	LDHA
7.98e-66	1.26768	0.934	0.779	2.68e-61	RTM_2	S100A10
1.78e-40	1.30392	0.926	0.739	5.96e-36	RTM_2	CSTB
2.17e-68	1.33084	0.408	0.109	7.28e-64	RTM_2	S100A8
7.71e-115	1.33122	0.98	0.83	2.59e-110	RTM_2	VIM
5.51e-85	1.35687	0.539	0.157	1.85e-80	RTM_2	CD52
3.3e-61	1.44913	0.805	0.502	1.11e-56	RTM_2	FN1
9.35e-95	1.58328	0.631	0.208	3.14e-90	RTM_2	GBP1
4.21e-82	1.59324	0.543	0.169	1.41e-77	RTM_2	MMP9
2.54e-119	1.60824	0.346	0.045	8.52e-115	RTM_2	CHI3L1
6.44e-45	1.68929	0.678	0.364	2.16e-40	RTM_2	PLIN2
4.88e-41	1.80436	0.443	0.188	1.64e-36	RTM_2	CXCL10
4.3e-216	1.96463	0.537	0.058	1.44e-211	RTM_2	MARCO
3.54e-143	1.99126	0.99	0.631	1.19e-138	RTM_2	LYZ
1.4e-189	2.27921	0.674	0.136	4.71e-185	RTM_2	FBP1
9.71e-138	2.47201	0.605	0.143	3.26e-133	RTM_2	CXCL9
p_val	avg_log2FC	pct.1	pct.2	p_val_adj	cluster	gene
2.03e-11	-2.13746	0.619	0.339	6.81e-07	RTM_3	IGKC
8.02e-07	-1.53421	0.272	0.141	0.0269078	RTM_3	IGLC2
1.06e-08	-1.1623	0.545	0.635	0.000355911	RTM_3	IFI6
9.35e-11	-1.10955	0.297	0.125	3.14e-06	RTM_3	IGHG1
1.61e-07	-1.07386	0.559	0.645	0.00540612	RTM_3	IFITM3
1.55e-09	-1.00155	0.772	0.844	5.21e-05	RTM_3	APOC1
6.56e-11	-0.971396	0.302	0.131	2.2e-06	RTM_3	IGHG3
7.27e-18	-0.961773	0.946	0.945	2.44e-13	RTM_3	LGALS1
8.95e-12	-0.909827	0.698	0.763	3e-07	RTM_3	RPL31
1.89e-09	-0.855131	0.228	0.429	6.35e-05	RTM_3	RPS17
4.12e-15	-0.831748	0.921	0.931	1.38e-10	RTM_3	RPL27A
1.25e-13	-0.799817	0.98	0.952	4.19e-09	RTM_3	RPL13A
3.29e-20	-0.76991	1	0.999	1.1e-15	RTM_3	TMSB4X
2.47e-07	-0.709149	0.748	0.762	0.00829643	RTM_3	CSTB
2.17e-20	-0.682101	0.975	0.977	7.29e-16	RTM_3	TYROBP
5.14e-14	-0.667613	0.926	0.929	1.72e-09	RTM_3	FCER1G
3.13e-09	-0.61624	0.901	0.891	0.00010502	RTM_3	PFN1
6.12e-09	-0.614358	0.911	0.878	0.000205194	RTM_3	RPS20
9.77e-11	-0.591499	0.95	0.962	3.28e-06	RTM_3	CST3
1.88e-09	-0.55754	0.896	0.909	6.32e-05	RTM_3	CD63
6.24e-08	-0.53039	1	1	0.0020911	RTM_3	FTL
3.57e-11	-0.519304	0.941	0.941	1.2e-06	RTM_3	NPC2
1.54e-12	0.502082	0.356	0.155	5.17e-08	RTM_3	PRDM1
1.49e-13	0.503353	0.614	0.343	5e-09	RTM_3	CLEC2B
1.62e-09	0.508861	0.748	0.526	5.45e-05	RTM_3	SOD2
2.69e-19	0.509094	0.287	0.091	9.01e-15	RTM_3	AC016831.5
2.4e-08	0.509212	0.55	0.338	0.000804483	RTM_3	HSPD1
4.91e-11	0.509659	0.342	0.162	1.65e-06	RTM_3	PNN
3.59e-26	0.515088	0.312	0.084	1.21e-21	RTM_3	APOBEC3G
9.94e-12	0.519138	0.619	0.371	3.33e-07	RTM_3	REL
1.08e-14	0.519228	0.446	0.208	3.62e-10	RTM_3	AC020916.1
1.94e-23	0.523999	1	0.995	6.52e-19	RTM_3	MALAT1
2.13e-13	0.529518	0.337	0.145	7.13e-09	RTM_3	ZNF292
4.61e-20	0.53593	1	0.985	1.55e-15	RTM_3	MT-ND4
2.64e-12	0.537195	0.847	0.587	8.86e-08	RTM_3	HSPA8
2.15e-16	0.541614	0.386	0.158	7.22e-12	RTM_3	RAC2
1.4e-13	0.547829	0.272	0.104	4.7e-09	RTM_3	GABPB1-AS1
1.21e-14	0.54888	0.46	0.219	4.05e-10	RTM_3	RARRES3
2.77e-18	0.551491	0.441	0.186	9.29e-14	RTM_3	PPP1R12A
6.35e-14	0.555971	0.911	0.726	2.13e-09	RTM_3	MT-ND5
1.72e-21	0.556033	0.99	0.903	5.77e-17	RTM_3	TPT1
2.49e-11	0.576194	0.946	0.867	8.35e-07	RTM_3	HSP90AA1
1.15e-13	0.576209	0.441	0.214	3.86e-09	RTM_3	EZR
7.8e-25	0.584929	0.257	0.064	2.62e-20	RTM_3	PTPN7
2.38e-19	0.585072	0.401	0.154	7.97e-15	RTM_3	FAM129A
2.78e-17	0.585941	0.322	0.12	9.32e-13	RTM_3	BTN3A2
1.22e-18	0.587492	0.381	0.147	4.08e-14	RTM_3	PPP2R5C
6.92e-24	0.591592	0.381	0.127	2.32e-19	RTM_3	IL2RG
4.44e-19	0.599491	0.356	0.128	1.49e-14	RTM_3	KIAA1551
1.83e-19	0.602845	0.312	0.105	6.15e-15	RTM_3	GBP5
5.26e-15	0.608953	0.673	0.384	1.76e-10	RTM_3	TNFAIP3
1.15e-18	0.610822	0.426	0.176	3.85e-14	RTM_3	ADGRE5
3.1e-29	0.635538	0.262	0.059	1.04e-24	RTM_3	AC058791.1
2.71e-20	0.640429	0.975	0.921	9.1e-16	RTM_3	MT-ND3
2.03e-20	0.659345	0.564	0.263	6.8e-16	RTM_3	ANKRD12
9.74e-18	0.67424	0.673	0.371	3.27e-13	RTM_3	SRSF7
1.68e-17	0.679841	0.837	0.542	5.64e-13	RTM_3	XIST
5.29e-26	0.69349	0.589	0.244	1.77e-21	RTM_3	EVL
2.96e-23	0.697701	0.322	0.1	9.92e-19	RTM_3	PIK3IP1
2.96e-33	0.701146	0.327	0.077	9.91e-29	RTM_3	STK17A
4.46e-27	0.703178	0.995	0.94	1.5e-22	RTM_3	MT-CYB
8.48e-21	0.704531	0.698	0.36	2.84e-16	RTM_3	MTRNR2L8
3.09e-19	0.706779	0.351	0.127	1.04e-14	RTM_3	BIRC3
1.1e-20	0.736567	0.926	0.621	3.69e-16	RTM_3	TXNIP
2.26e-60	0.738527	0.317	0.043	7.57e-56	RTM_3	ACAP1
4.75e-19	0.742222	0.767	0.463	1.59e-14	RTM_3	PTPRC
2.07e-16	0.783221	0.787	0.497	6.93e-12	RTM_3	ZFP36L2
6.17e-21	0.818748	0.777	0.445	2.07e-16	RTM_3	CXCR4
1.74e-17	0.820442	0.787	0.499	5.82e-13	RTM_3	DNAJB1
3.01e-41	0.844028	0.426	0.108	1.01e-36	RTM_3	CYTIP
4.49e-24	0.846061	0.757	0.394	1.51e-19	RTM_3	TSC22D3
1.37e-29	0.852265	0.99	0.944	4.6e-25	RTM_3	MT-ATP6
6.03e-143	0.916156	0.307	0.012	2.02e-138	RTM_3	CD3G
1.84e-121	0.929155	0.257	0.01	6.17e-117	RTM_3	CTSW
5.76e-13	0.946261	0.396	0.188	1.93e-08	RTM_3	CXCL9
1.14e-56	0.969389	0.658	0.178	3.82e-52	RTM_3	CD52
2.26e-35	0.97489	0.975	0.645	7.58e-31	RTM_3	BTG1
5.54e-108	1.03229	0.317	0.022	1.86e-103	RTM_3	ETS1
1.99e-122	1.04344	0.342	0.021	6.69e-118	RTM_3	CST7
8.28e-85	1.14955	0.302	0.027	2.78e-80	RTM_3	CD7
5e-54	1.16954	0.455	0.097	1.68e-49	RTM_3	CD69
5.32e-65	1.22272	0.342	0.047	1.78e-60	RTM_3	LTB
7.03e-162	1.28374	0.416	0.023	2.36e-157	RTM_3	TRAC
5.3e-183	1.39459	0.366	0.013	1.78e-178	RTM_3	TRBC1
2.13e-149	1.39561	0.322	0.013	7.13e-145	RTM_3	GZMK
2.85e-218	1.42359	0.49	0.022	9.57e-214	RTM_3	CD2
7.4e-78	1.44457	0.495	0.087	2.48e-73	RTM_3	IL7R
1.46e-171	1.50645	0.426	0.023	4.9e-167	RTM_3	TRBC2
4.22e-220	1.61133	0.52	0.026	1.42e-215	RTM_3	CD3D
1.19e-248	1.6437	0.455	0.013	3.99e-244	RTM_3	GZMA
9.71e-157	1.75803	0.465	0.033	3.25e-152	RTM_3	NKG7
3.73e-105	1.8479	0.678	0.13	1.25e-100	RTM_3	IL32
1.69e-85	1.90491	0.738	0.189	5.68e-81	RTM_3	CCL5
9.47e-154	3.12431	0.322	0.012	3.17e-149	RTM_3	GNLY
p_val	avg_log2FC	pct.1	pct.2	p_val_adj	cluster	gene
3.07e-51	-5.78116	0.019	0.699	1.03e-46	RTM_4	SPP1
8.81e-21	-3.30028	0.205	0.561	2.96e-16	RTM_4	ISG15
1.58e-32	-2.80416	0.05	0.557	5.32e-28	RTM_4	FN1
1.05e-24	-2.51217	0.261	0.645	3.52e-20	RTM_4	IFI6
3.93e-28	-2.32106	0.106	0.575	1.32e-23	RTM_4	C15orf48
6.36e-16	-2.27426	0.311	0.591	2.13e-11	RTM_4	IFI27
1.28e-56	-2.23975	0.677	0.956	4.28e-52	RTM_4	LGALS1
4.98e-33	-1.96265	0.503	0.854	1.67e-28	RTM_4	APOC1
4.22e-19	-1.94132	0.217	0.556	1.42e-14	RTM_4	LY6E
9.99e-12	-1.78569	0.366	0.549	3.35e-07	RTM_4	NUPR1
3.34e-47	-1.76686	0.696	0.912	1.12e-42	RTM_4	GAPDH
2.65e-16	-1.68618	0.062	0.378	8.88e-12	RTM_4	GCHFR
2.52e-34	-1.64958	0.404	0.773	8.44e-30	RTM_4	CAPG
2.7e-54	-1.59674	0.795	0.97	9.07e-50	RTM_4	S100A11
5.93e-15	-1.5037	0.64	0.766	1.99e-10	RTM_4	CSTB
6.67e-18	-1.40384	0.106	0.462	2.24e-13	RTM_4	OLR1
9.79e-15	-1.39982	0.199	0.497	3.28e-10	RTM_4	MIF
5.77e-20	-1.37523	0.335	0.676	1.93e-15	RTM_4	CD9
2.09e-18	-1.35867	0.304	0.6	7.01e-14	RTM_4	PKM
6.61e-24	-1.32015	0.652	0.91	2.22e-19	RTM_4	APOE
8.58e-12	-1.30506	0.46	0.647	2.88e-07	RTM_4	ALOX5AP
1.19e-15	-1.27492	0.099	0.421	3.98e-11	RTM_4	LSP1
1.81e-16	-1.26874	0.311	0.603	6.07e-12	RTM_4	PSME2
3.98e-09	-1.24867	0.323	0.517	0.000133489	RTM_4	CKLF
2.96e-13	-1.22098	0.366	0.606	9.91e-09	RTM_4	TXN
6.81e-12	-1.2025	0.373	0.602	2.28e-07	RTM_4	NOP10
3.55e-11	-1.18321	0.075	0.32	1.19e-06	RTM_4	IL4I1
1.15e-13	-1.12257	0.273	0.567	3.86e-09	RTM_4	TREM2
9.27e-14	-1.11167	0.342	0.574	3.11e-09	RTM_4	GSTO1
6.02e-14	-1.11073	0.41	0.623	2.02e-09	RTM_4	ENO1
7.71e-19	-1.102	0.547	0.749	2.59e-14	RTM_4	ANXA2
3.69e-10	-1.09792	0.329	0.518	1.24e-05	RTM_4	LDHA
1.71e-18	-1.09778	0.758	0.897	5.74e-14	RTM_4	PFN1
9.17e-14	-1.08591	0.298	0.594	3.08e-09	RTM_4	FABP5
2.65e-16	-1.07952	0.584	0.743	8.9e-12	RTM_4	TYMP
7.77e-32	-1.07363	0.944	0.986	2.61e-27	RTM_4	RPS19
1.4e-21	-1.05358	0.671	0.869	4.68e-17	RTM_4	SH3BGRL3
5.45e-14	-1.05002	0.503	0.712	1.83e-09	RTM_4	COX7A2
7.58e-11	-1.04538	0.385	0.573	2.54e-06	RTM_4	ATP5MC3
3.69e-16	-1.0371	0.609	0.842	1.24e-11	RTM_4	S100A4
4.99e-12	-1.01617	0.882	0.876	1.67e-07	RTM_4	CTSD
2.49e-07	-0.999733	0.081	0.261	0.00834706	RTM_4	SDS
5.62e-13	-0.995973	0.565	0.745	1.88e-08	RTM_4	COX6C
2.39e-10	-0.987687	0.18	0.42	8e-06	RTM_4	SLC16A3
1.17e-25	-0.987547	0.584	0.908	3.91e-21	RTM_4	S100A6
2.82e-10	-0.97736	0.037	0.261	9.47e-06	RTM_4	PPA1
7.04e-09	-0.972412	0.447	0.607	0.000236054	RTM_4	COX6A1
3.29e-14	-0.971871	0.522	0.706	1.1e-09	RTM_4	TSPO
3.28e-16	-0.968361	0.677	0.807	1.1e-11	RTM_4	PRDX1
8.85e-14	-0.96124	0.602	0.751	2.97e-09	RTM_4	ATP6V1F
7.76e-16	-0.959571	0.919	0.975	2.6e-11	RTM_4	RPS18
1.44e-28	-0.958071	0.907	0.969	4.82e-24	RTM_4	SERF2
4.83e-13	-0.957519	0.472	0.661	1.62e-08	RTM_4	TPI1
1.27e-07	-0.937571	0.075	0.254	0.00425157	RTM_4	BCL2A1
4.75e-12	-0.934156	0.528	0.724	1.59e-07	RTM_4	PSMA7
3.4e-15	-0.933316	0.714	0.853	1.14e-10	RTM_4	VIM
1.48e-14	-0.923294	0.677	0.811	4.95e-10	RTM_4	COX7C
2.76e-15	-0.889773	0.77	0.871	9.27e-11	RTM_4	RPS5
9.9e-08	-0.874595	0.068	0.255	0.00332124	RTM_4	KRT19
1.78e-14	-0.870754	0.745	0.831	5.99e-10	RTM_4	RPLP0
6.57e-17	-0.851204	0.571	0.807	2.2e-12	RTM_4	S100A10
2.26e-08	-0.846933	0.472	0.617	0.00075859	RTM_4	SSR4
1.01e-06	-0.817219	0.335	0.503	0.0337279	RTM_4	IGSF6
1.8e-09	-0.810736	0.503	0.658	6.03e-05	RTM_4	CLIC1
5.88e-07	-0.808343	0.211	0.394	0.0197262	RTM_4	PSMB6
4.81e-07	-0.807464	0.168	0.37	0.0161356	RTM_4	IFI30
1.43e-06	-0.807141	0.161	0.332	0.0478363	RTM_4	NDUFA6
1.61e-17	-0.804149	0.807	0.903	5.4e-13	RTM_4	MYL6
7.21e-08	-0.800702	0.484	0.651	0.00241808	RTM_4	UQCRQ
1.8e-08	-0.79447	0.497	0.655	0.000603196	RTM_4	YWHAH
6.49e-08	-0.790814	0.298	0.488	0.00217724	RTM_4	COX5A
4.04e-15	-0.784284	0.95	0.981	1.36e-10	RTM_4	RPS15
1.12e-12	-0.75905	0.708	0.828	3.77e-08	RTM_4	SRP14
4.64e-08	-0.747841	0.28	0.492	0.00155605	RTM_4	PLAUR
6.68e-09	-0.74709	0.217	0.465	0.00022397	RTM_4	CIB1
1.86e-07	-0.73353	0.248	0.447	0.00622613	RTM_4	JPT1
4.21e-12	-0.720331	0.845	0.904	1.41e-07	RTM_4	RPS3
1.29e-06	-0.716157	0.478	0.606	0.0432694	RTM_4	COX7B
2.78e-12	-0.6859	0.944	0.973	9.33e-08	RTM_4	RPS2
2.4e-07	-0.66704	1	1	0.00803641	RTM_4	FTL
8.15e-07	-0.666264	0.565	0.687	0.027328	RTM_4	MYL12A
7.44e-08	-0.65451	0.435	0.657	0.00249631	RTM_4	EMP3
2.13e-13	-0.65131	0.925	0.942	7.14e-09	RTM_4	RPL8
6.74e-08	-0.647327	0.596	0.721	0.00226134	RTM_4	POMP
4.32e-11	-0.641861	0.814	0.862	1.45e-06	RTM_4	LAPTM5
3.81e-09	-0.639529	0.925	0.929	0.000127631	RTM_4	FCER1G
2.66e-09	-0.629659	0.658	0.777	8.92e-05	RTM_4	DYNLL1
4.59e-07	-0.627034	0.652	0.742	0.0153997	RTM_4	RPSA
5.75e-07	-0.620733	0.665	0.735	0.0192862	RTM_4	ATP6V0E1
1.16e-06	-0.61444	0.758	0.807	0.0389289	RTM_4	RPL10A
6.53e-11	-0.607433	0.807	0.861	2.19e-06	RTM_4	CFL1
3.14e-12	-0.590436	0.957	0.981	1.05e-07	RTM_4	RPS14
3.58e-11	-0.586281	0.888	0.935	1.2e-06	RTM_4	CYBA
1.45e-09	-0.577994	0.894	0.909	4.86e-05	RTM_4	CD63
8.83e-09	-0.562659	0.894	0.934	0.000296118	RTM_4	RPL18A
9.85e-14	-0.557254	0.988	0.994	3.3e-09	RTM_4	RPLP1
7.77e-15	-0.548654	0.957	0.986	2.61e-10	RTM_4	RPL28
3.07e-09	-0.519459	0.857	0.874	0.000102799	RTM_4	RPL29
6.51e-07	-0.511339	0.919	0.94	0.0218454	RTM_4	RPL35
1.74e-07	0.501362	0.689	0.52	0.00582949	RTM_4	ACTR2
6.28e-08	0.502189	0.329	0.173	0.00210727	RTM_4	MDM4
1.97e-07	0.50372	0.348	0.194	0.00661343	RTM_4	GLUD1
3.46e-08	0.504484	0.404	0.222	0.00116117	RTM_4	CELF1
1.15e-08	0.50711	0.255	0.113	0.00038665	RTM_4	PPP3CA
6.87e-07	0.508389	0.28	0.148	0.0230263	RTM_4	MYO5A
5.61e-08	0.508858	0.273	0.132	0.00188017	RTM_4	ZMYM2
2.2e-07	0.509925	0.373	0.217	0.00738899	RTM_4	AMD1
4.14e-10	0.512601	0.373	0.183	1.39e-05	RTM_4	CDV3
1.16e-09	0.514289	0.683	0.458	3.88e-05	RTM_4	TIMP2
9.41e-08	0.514469	0.522	0.333	0.00315653	RTM_4	NFE2L2
6.71e-16	0.514974	1	0.996	2.25e-11	RTM_4	MT-CO3
1.64e-08	0.515046	0.379	0.204	0.000551356	RTM_4	DDAH2
2.81e-08	0.518047	0.696	0.5	0.000941314	RTM_4	BRI3
1.13e-09	0.518295	0.28	0.123	3.78e-05	RTM_4	ALDH9A1
6.44e-09	0.520806	0.379	0.196	0.000216075	RTM_4	PTBP3
4.06e-07	0.521141	0.36	0.207	0.0136232	RTM_4	RHOQ
4.66e-07	0.522244	0.571	0.415	0.0156342	RTM_4	IQGAP1
5.29e-10	0.522274	0.435	0.228	1.77e-05	RTM_4	STMN1
1.73e-10	0.523466	0.298	0.128	5.79e-06	RTM_4	RBM5
1.01e-06	0.530301	0.646	0.465	0.033773	RTM_4	RPL36A
8.4e-08	0.532956	0.677	0.478	0.00281883	RTM_4	WSB1
1.34e-06	0.534976	0.491	0.329	0.0448072	RTM_4	SRSF5
2.8e-08	0.535702	0.335	0.176	0.000938882	RTM_4	PIAS1
1.26e-07	0.536443	0.311	0.161	0.00424229	RTM_4	ZBTB20
1.26e-09	0.538856	0.28	0.123	4.24e-05	RTM_4	RNF144B
5.44e-07	0.539645	0.304	0.166	0.0182481	RTM_4	BLOC1S6
2.63e-11	0.540226	0.28	0.112	8.81e-07	RTM_4	FAM49A
4.22e-08	0.542302	0.534	0.345	0.00141474	RTM_4	TGOLN2
1.63e-07	0.544449	0.584	0.388	0.00545602	RTM_4	EIF4A2
4.34e-09	0.547391	0.404	0.213	0.000145663	RTM_4	FOXP1
2.91e-10	0.548104	0.366	0.177	9.75e-06	RTM_4	TBL1XR1
1.57e-09	0.555701	0.683	0.47	5.28e-05	RTM_4	ZEB2
1.05e-08	0.555926	0.776	0.586	0.000352073	RTM_4	HNRNPA2B1
3.04e-11	0.556946	0.261	0.1	1.02e-06	RTM_4	KLF3
5.61e-10	0.56511	0.863	0.666	1.88e-05	RTM_4	HLA-DQA1
1.18e-16	0.566183	1	0.985	3.96e-12	RTM_4	MT-ND4
4.61e-10	0.567081	0.484	0.274	1.55e-05	RTM_4	DRAM2
6.92e-08	0.567912	0.453	0.274	0.00232	RTM_4	RBM47
7.01e-09	0.569417	0.522	0.32	0.000235068	RTM_4	BNIP3L
6.76e-08	0.569964	0.391	0.223	0.00226854	RTM_4	FNBP1
1.21e-08	0.571211	0.354	0.186	0.000406528	RTM_4	AFF4
3.56e-10	0.572983	0.745	0.491	1.19e-05	RTM_4	FCGR2A
1.11e-11	0.576485	0.745	0.445	3.72e-07	RTM_4	TMEM176B
4.79e-09	0.578533	0.615	0.418	0.000160654	RTM_4	SARAF
5.03e-09	0.581045	0.329	0.167	0.000168843	RTM_4	NFIC
1.02e-06	0.584063	0.491	0.34	0.0340817	RTM_4	UCP2
1.43e-10	0.585114	0.472	0.257	4.78e-06	RTM_4	TACC1
2.19e-12	0.586069	0.267	0.098	7.33e-08	RTM_4	STK17B
2.28e-07	0.588514	0.46	0.292	0.00765038	RTM_4	ABCA1
1.24e-06	0.59008	0.379	0.227	0.0417102	RTM_4	PLXND1
2.57e-08	0.590331	0.509	0.327	0.000862876	RTM_4	TSPAN4
1.64e-08	0.59358	0.553	0.34	0.000548529	RTM_4	GPR183
1.16e-08	0.593856	0.919	0.817	0.000388676	RTM_4	SRGN
3.24e-11	0.595357	0.882	0.692	1.09e-06	RTM_4	CTSS
1.01e-09	0.598812	0.391	0.204	3.38e-05	RTM_4	EPB41L3
1.4e-09	0.602498	0.478	0.282	4.7e-05	RTM_4	SF3B1
7.06e-08	0.60272	0.733	0.531	0.0023675	RTM_4	HERPUD1
2.97e-09	0.603652	0.273	0.122	9.96e-05	RTM_4	CD55
1.83e-11	0.612957	0.453	0.239	6.14e-07	RTM_4	PRKAR1A
8.99e-11	0.614303	0.609	0.391	3.02e-06	RTM_4	DDX17
1.57e-10	0.61749	0.261	0.106	5.27e-06	RTM_4	SH3BP5
6.54e-12	0.623219	0.447	0.22	2.19e-07	RTM_4	SPATS2L
7.83e-10	0.625204	0.342	0.168	2.63e-05	RTM_4	B4GALT1
1.07e-14	0.625518	0.994	0.96	3.59e-10	RTM_4	CST3
4.4e-09	0.626653	0.261	0.113	0.000147663	RTM_4	OTUD1
1.47e-09	0.627203	0.373	0.194	4.92e-05	RTM_4	CREBL2
7.3e-11	0.631744	0.373	0.177	2.45e-06	RTM_4	NAIP
7.32e-13	0.631848	0.64	0.382	2.45e-08	RTM_4	C6orf62
5.28e-09	0.631849	0.323	0.162	0.00017711	RTM_4	MAP3K8
1.34e-08	0.632244	0.453	0.273	0.000450285	RTM_4	TNFRSF1A
1.5e-09	0.633355	0.398	0.214	5.05e-05	RTM_4	JMJD1C
2.09e-13	0.639187	0.41	0.182	7.01e-09	RTM_4	SIGLEC1
4.82e-13	0.639592	0.72	0.463	1.62e-08	RTM_4	MFSD1
4.03e-10	0.64098	0.509	0.3	1.35e-05	RTM_4	TCF4
5.41e-13	0.641059	0.447	0.209	1.81e-08	RTM_4	LTC4S
3.18e-07	0.646348	0.429	0.27	0.0106667	RTM_4	LRP1
6.34e-10	0.646578	0.491	0.287	2.13e-05	RTM_4	CELF2
7.97e-09	0.64732	0.379	0.206	0.000267431	RTM_4	INTS6
6.7e-09	0.648858	0.373	0.202	0.000224569	RTM_4	AES
1.95e-08	0.648957	0.311	0.155	0.000652583	RTM_4	KLF10
7.15e-08	0.651047	0.435	0.273	0.00239757	RTM_4	PABPC4
3.86e-11	0.652249	0.398	0.198	1.29e-06	RTM_4	ATP2B1
2.05e-12	0.654201	0.925	0.727	6.88e-08	RTM_4	MT-ND5
3.71e-07	0.656131	0.267	0.133	0.0124324	RTM_4	BIRC3
8.66e-20	0.657209	0.286	0.083	2.9e-15	RTM_4	EPHX1
4.55e-10	0.662693	0.59	0.384	1.53e-05	RTM_4	QKI
2.58e-11	0.66298	0.54	0.316	8.67e-07	RTM_4	NCOA4
7.43e-18	0.663194	0.354	0.125	2.49e-13	RTM_4	PRKACB
2.62e-16	0.663929	0.255	0.077	8.77e-12	RTM_4	SESN3
4.75e-11	0.664867	0.335	0.155	1.59e-06	RTM_4	FOXO3
2.55e-12	0.66498	0.391	0.186	8.55e-08	RTM_4	SH2B3
2.24e-09	0.668308	0.466	0.28	7.53e-05	RTM_4	IRF2BP2
3.4e-19	0.668592	0.994	0.94	1.14e-14	RTM_4	MT-CYB
1.81e-10	0.669135	0.348	0.171	6.07e-06	RTM_4	CAT
6.31e-12	0.673962	0.391	0.187	2.11e-07	RTM_4	IL10RA
3.01e-09	0.676075	0.373	0.198	0.000100795	RTM_4	NR3C1
3.77e-10	0.679292	0.602	0.402	1.26e-05	RTM_4	MT-ND4L
1.38e-10	0.684738	0.727	0.473	4.64e-06	RTM_4	PNRC1
7.37e-11	0.689713	0.398	0.202	2.47e-06	RTM_4	TGFBR2
3.23e-09	0.692417	0.646	0.44	0.000108482	RTM_4	NAMPT
2.22e-11	0.695793	0.398	0.202	7.46e-07	RTM_4	DICER1
5.65e-12	0.697831	0.391	0.185	1.89e-07	RTM_4	TNFRSF1B
6.1e-13	0.69914	0.329	0.136	2.05e-08	RTM_4	METTL7A
3.26e-22	0.70133	0.261	0.064	1.09e-17	RTM_4	ITSN1
1.21e-13	0.701361	0.913	0.688	4.05e-09	RTM_4	HLA-DQB1
5.53e-11	0.703309	0.839	0.624	1.86e-06	RTM_4	CD14
1.06e-17	0.715175	0.354	0.127	3.55e-13	RTM_4	CMKLR1
6.29e-10	0.717197	0.677	0.462	2.11e-05	RTM_4	RHOB
1.75e-12	0.717656	0.466	0.245	5.87e-08	RTM_4	RBMS1
4.21e-10	0.721601	0.503	0.307	1.41e-05	RTM_4	SNX2
1.03e-10	0.72397	0.46	0.256	3.46e-06	RTM_4	SERINC1
4.3e-20	0.724317	1	0.944	1.44e-15	RTM_4	MT-ATP6
3.78e-08	0.72538	0.497	0.316	0.00126868	RTM_4	ARL4C
9.64e-21	0.727916	0.957	0.771	3.23e-16	RTM_4	C1QC
4.24e-14	0.740414	0.404	0.181	1.42e-09	RTM_4	ITPR2
8.85e-14	0.745162	0.478	0.24	2.97e-09	RTM_4	FUCA1
4.73e-15	0.745908	0.422	0.184	1.59e-10	RTM_4	TTYH3
2.36e-11	0.752523	0.522	0.323	7.91e-07	RTM_4	CLTC
1.49e-06	0.753187	0.708	0.537	0.0498314	RTM_4	FOSB
4.79e-16	0.754497	0.441	0.194	1.61e-11	RTM_4	SMAP2
2.82e-25	0.761485	0.273	0.064	9.45e-21	RTM_4	CYBRD1
3.53e-21	0.769185	0.28	0.075	1.19e-16	RTM_4	SGMS1
1.94e-10	0.769619	0.801	0.614	6.5e-06	RTM_4	JUNB
5.92e-08	0.780271	0.435	0.269	0.00198525	RTM_4	C5AR1
5.74e-16	0.783837	0.335	0.126	1.93e-11	RTM_4	GPR155
2.3e-14	0.78612	0.783	0.548	7.7e-10	RTM_4	XIST
3.09e-14	0.788109	0.708	0.449	1.04e-09	RTM_4	DDX3X
6.15e-08	0.788184	0.509	0.336	0.00206366	RTM_4	MTRNR2L12
1.7e-16	0.795032	0.919	0.733	5.69e-12	RTM_4	DDX5
7.35e-10	0.795902	0.702	0.52	2.46e-05	RTM_4	CYBB
1.07e-16	0.797608	0.373	0.146	3.58e-12	RTM_4	GATM
7.2e-24	0.798823	0.267	0.064	2.41e-19	RTM_4	FAM13A
2.58e-08	0.802795	0.373	0.205	0.000865976	RTM_4	KDM6B
2.83e-08	0.807264	0.602	0.423	0.000950327	RTM_4	AHNAK
8.71e-24	0.811785	0.981	0.843	2.92e-19	RTM_4	ITM2B
8.69e-10	0.814284	0.354	0.179	2.92e-05	RTM_4	RUNX1
8.47e-19	0.81567	0.571	0.27	2.84e-14	RTM_4	GYPC
5.18e-14	0.815808	0.385	0.171	1.74e-09	RTM_4	TLR4
4.19e-18	0.81714	0.342	0.12	1.4e-13	RTM_4	AHR
7.62e-13	0.818568	0.478	0.254	2.56e-08	RTM_4	SPRED1
5.72e-14	0.819776	0.814	0.543	1.92e-09	RTM_4	CTSC
2.8e-08	0.830199	0.64	0.462	0.000938652	RTM_4	ANXA1
2.17e-26	0.832447	0.994	0.773	7.29e-22	RTM_4	C1QB
1.03e-10	0.833963	0.484	0.276	3.45e-06	RTM_4	CPM
9.1e-23	0.835308	0.491	0.186	3.05e-18	RTM_4	SDC3
1.43e-14	0.839724	0.534	0.282	4.81e-10	RTM_4	CPVL
1.59e-14	0.842334	0.422	0.193	5.33e-10	RTM_4	CPEB4
5.4e-25	0.842473	0.342	0.095	1.81e-20	RTM_4	ARRDC2
1.48e-18	0.842502	0.702	0.412	4.97e-14	RTM_4	BLVRB
9.36e-16	0.843994	0.491	0.238	3.14e-11	RTM_4	ZFHX3
2.17e-13	0.847551	0.627	0.383	7.28e-09	RTM_4	CSF1R
1.32e-14	0.849319	0.441	0.217	4.43e-10	RTM_4	IQGAP2
3.2e-10	0.849588	0.696	0.45	1.07e-05	RTM_4	NR4A2
6.86e-30	0.855455	1	0.904	2.3e-25	RTM_4	TPT1
1.03e-34	0.859963	0.317	0.065	3.44e-30	RTM_4	PDGFC
2.88e-19	0.864715	0.565	0.271	9.65e-15	RTM_4	PRNP
8.9e-45	0.865285	0.261	0.034	2.98e-40	RTM_4	GNG2
1.01e-19	0.865373	0.286	0.079	3.4e-15	RTM_4	CD36
2.66e-17	0.86974	0.522	0.251	8.93e-13	RTM_4	FRMD4B
8.94e-13	0.870523	0.304	0.122	3e-08	RTM_4	IRS2
3.64e-20	0.873433	0.665	0.345	1.22e-15	RTM_4	C3AR1
1.02e-30	0.87463	0.335	0.078	3.42e-26	RTM_4	PELI1
1.52e-18	0.885199	0.683	0.389	5.09e-14	RTM_4	SNX6
3.04e-21	0.901894	0.882	0.651	1.02e-16	RTM_4	FCGRT
4.73e-15	0.908232	0.646	0.389	1.59e-10	RTM_4	FGL2
1.24e-12	0.923595	0.683	0.469	4.14e-08	RTM_4	JUND
2.12e-17	0.926331	0.286	0.09	7.12e-13	RTM_4	COLEC12
4.05e-15	0.934768	0.739	0.522	1.36e-10	RTM_4	MCL1
1.17e-27	0.939883	0.435	0.136	3.91e-23	RTM_4	ETS2
6e-30	0.94649	0.298	0.064	2.01e-25	RTM_4	SLC18B1
9.14e-27	0.950886	0.342	0.09	3.07e-22	RTM_4	RGL1
9.55e-22	0.952408	0.317	0.095	3.2e-17	RTM_4	ME1
9.57e-25	0.955056	0.845	0.533	3.21e-20	RTM_4	PABPC1
1.11e-12	0.96724	0.41	0.199	3.71e-08	RTM_4	CITED2
2.55e-26	0.968784	0.832	0.466	8.57e-22	RTM_4	A2M
9.99e-16	0.971639	0.739	0.502	3.35e-11	RTM_4	ZFP36L2
9.43e-33	0.97237	0.994	0.813	3.16e-28	RTM_4	C1QA
5.91e-19	0.976922	0.503	0.226	1.98e-14	RTM_4	NRP1
1.01e-16	0.986422	0.41	0.178	3.38e-12	RTM_4	FKBP5
9.2e-15	0.993438	0.845	0.677	3.09e-10	RTM_4	KLF6
2.31e-23	0.997774	0.429	0.153	7.75e-19	RTM_4	EPS15
2.83e-34	1.00684	0.329	0.069	9.5e-30	RTM_4	GAS6
2.75e-34	1.01021	0.994	0.936	9.24e-30	RTM_4	MT-ND1
8.14e-13	1.03225	0.54	0.336	2.73e-08	RTM_4	RBPJ
1.17e-24	1.0795	0.547	0.232	3.92e-20	RTM_4	MPEG1
8.3e-24	1.09295	0.758	0.443	2.78e-19	RTM_4	CEBPB
5e-40	1.09707	0.342	0.067	1.68e-35	RTM_4	SESN1
8.01e-23	1.09966	0.466	0.183	2.69e-18	RTM_4	ALDH1A1
1.83e-32	1.10033	0.404	0.106	6.14e-28	RTM_4	EMB
1.65e-19	1.10253	0.857	0.627	5.53e-15	RTM_4	TXNIP
1.84e-35	1.1093	0.41	0.103	6.19e-31	RTM_4	MTSS1
7.32e-14	1.11683	0.466	0.239	2.45e-09	RTM_4	PMP22
4.1e-27	1.12183	0.491	0.179	1.38e-22	RTM_4	CD302
6.69e-23	1.14442	0.925	0.74	2.24e-18	RTM_4	DUSP1
1.68e-25	1.14573	0.882	0.608	5.62e-21	RTM_4	MAFB
2.61e-29	1.16289	0.497	0.178	8.76e-25	RTM_4	AP2A2
7.61e-26	1.17216	0.913	0.668	2.55e-21	RTM_4	ZFP36L1
3.01e-32	1.17259	0.354	0.083	1.01e-27	RTM_4	NLRP3
2.88e-34	1.18385	0.932	0.532	9.65e-30	RTM_4	HLA-DRB5
1.07e-23	1.18633	0.609	0.275	3.58e-19	RTM_4	VSIG4
1.93e-24	1.1892	0.783	0.432	6.48e-20	RTM_4	CFD
3.55e-46	1.19101	0.379	0.072	1.19e-41	RTM_4	WWP1
2.11e-38	1.19102	0.938	0.613	7.07e-34	RTM_4	MS4A6A
4.24e-14	1.19509	0.696	0.458	1.42e-09	RTM_4	TRA2B
2.26e-20	1.19596	0.46	0.186	7.57e-16	RTM_4	ARRDC3
1.39e-39	1.20461	0.994	0.921	4.67e-35	RTM_4	MT-ND3
3.04e-37	1.20642	0.584	0.191	1.02e-32	RTM_4	GPR34
1.97e-17	1.23107	0.41	0.166	6.62e-13	RTM_4	DUSP6
2.29e-56	1.23595	0.41	0.071	7.67e-52	RTM_4	KLF9
1.71e-25	1.24027	0.615	0.279	5.74e-21	RTM_4	KLF4
8.61e-29	1.27227	0.745	0.39	2.89e-24	RTM_4	SLCO2B1
2.99e-14	1.2937	0.46	0.229	1e-09	RTM_4	TFRC
3.75e-71	1.3315	0.335	0.036	1.26e-66	RTM_4	CD209
1.35e-25	1.34275	0.77	0.469	4.54e-21	RTM_4	KCTD12
2.73e-51	1.34354	1	0.923	9.16e-47	RTM_4	MT-ND2
2.45e-22	1.35936	0.702	0.402	8.23e-18	RTM_4	ZFP36
2.87e-67	1.42195	0.385	0.051	9.64e-63	RTM_4	CXCL12
9.9e-202	1.4388	0.292	0.003	3.32e-197	RTM_4	MAMDC2
3.23e-30	1.43919	0.969	0.843	1.08e-25	RTM_4	FOS
2.48e-38	1.45239	0.795	0.403	8.31e-34	RTM_4	MS4A4A
1.98e-21	1.45536	0.677	0.375	6.63e-17	RTM_4	EGR1
3.82e-35	1.46936	0.764	0.397	1.28e-30	RTM_4	TSC22D3
4.35e-49	1.46962	0.938	0.599	1.46e-44	RTM_4	MS4A7
1.92e-24	1.47084	0.671	0.363	6.44e-20	RTM_4	PLTP
4.55e-26	1.47213	0.54	0.225	1.52e-21	RTM_4	KLF2
3.79e-36	1.58012	0.832	0.538	1.27e-31	RTM_4	DAB2
3.39e-33	1.60482	0.876	0.556	1.14e-28	RTM_4	RNASE1
4.66e-16	1.64167	0.273	0.093	1.56e-11	RTM_4	EMP1
4.2e-37	1.66067	0.894	0.55	1.41e-32	RTM_4	LGMN
1.9e-111	1.73092	0.547	0.063	6.36e-107	RTM_4	IGF1
4.41e-62	1.76556	0.509	0.101	1.48e-57	RTM_4	MAN1A1
1.89e-53	1.76863	0.764	0.302	6.33e-49	RTM_4	CD163
9.87e-49	1.78534	0.776	0.333	3.31e-44	RTM_4	CEBPD
3.76e-51	1.81151	0.745	0.27	1.26e-46	RTM_4	STAB1
7.18e-89	1.92344	0.497	0.068	2.41e-84	RTM_4	LILRB5
2.26e-32	1.99841	0.311	0.068	7.56e-28	RTM_4	CCL13
3.29e-52	2.04446	0.627	0.198	1.1e-47	RTM_4	MRC1
8.69e-13	2.08534	0.28	0.11	2.91e-08	RTM_4	CCL18
4.05e-112	2.25385	0.795	0.157	1.36e-107	RTM_4	FOLR2
4.76e-90	2.38347	0.845	0.225	1.6e-85	RTM_4	SLC40A1
1.72e-92	2.50117	0.851	0.242	5.76e-88	RTM_4	MAF
5.49e-268	2.93019	0.373	0.003	1.84e-263	RTM_4	LYVE1
3.5e-228	3.42144	0.727	0.053	1.17e-223	RTM_4	F13A1
5.74e-141	3.48869	0.981	0.249	1.93e-136	RTM_4	SELENOP
1.23e-202	4.10458	0.814	0.088	4.14e-198	RTM_4	PDK4
p_val	avg_log2FC	pct.1	pct.2	p_val_adj	cluster	gene
8.16e-07	-1.78988	0.75	0.761	0.0273693	RTM_5	CSTB
9.43e-18	-1.69339	1	1	3.16e-13	RTM_5	TMSB4X
5.7e-12	-1.65262	0.875	0.931	1.91e-07	RTM_5	RPL27A
3.23e-10	-1.60616	0.917	0.954	1.08e-05	RTM_5	RPL13A
7.73e-11	-1.51655	0.792	0.893	2.59e-06	RTM_5	PFN1
4.29e-12	-1.36157	0.896	0.929	1.44e-07	RTM_5	FCER1G
8.93e-08	-1.36127	0.729	0.796	0.00299458	RTM_5	RPL38
1.19e-08	-1.36113	0.938	0.945	0.000399253	RTM_5	LGALS1
8.17e-08	-1.12919	0.896	0.931	0.00274018	RTM_5	RPS29
3.89e-07	-1.10064	0.875	0.88	0.0130376	RTM_5	RPS20
1.66e-08	-0.994463	0.958	0.961	0.000557522	RTM_5	CST3
1.05e-09	-0.962907	0.938	0.977	3.51e-05	RTM_5	TYROBP
2.24e-08	-0.86717	0.917	0.964	0.000749737	RTM_5	S100A11
1.6e-07	-0.865695	0.979	0.957	0.00535548	RTM_5	RPL12
1.99e-07	-0.848515	1	0.999	0.00666428	RTM_5	FTH1
5.33e-07	-0.828657	0.917	0.941	0.0178819	RTM_5	NPC2
7.96e-08	-0.816827	0.938	0.921	0.00266829	RTM_5	OAZ1
1.19e-06	-0.742453	0.938	0.952	0.0398919	RTM_5	ATP5F1E
5.16e-09	-0.734346	1	0.998	0.000173103	RTM_5	TMSB10
4.48e-10	0.506602	0.333	0.078	1.5e-05	RTM_5	ANKRD37
5.11e-34	0.51431	0.292	0.021	1.71e-29	RTM_5	PIM2
7.45e-08	0.520893	0.562	0.207	0.00249707	RTM_5	LMAN1
4.44e-26	0.5472	0.333	0.034	1.49e-21	RTM_5	HIST1H2BG
1.33e-09	0.565586	0.292	0.066	4.46e-05	RTM_5	DNAJB4
1.66e-11	0.587561	0.396	0.096	5.58e-07	RTM_5	DNAJB9
1.03e-70	0.61431	0.312	0.01	3.47e-66	RTM_5	SPAG4
3.48e-11	0.666318	0.396	0.1	1.17e-06	RTM_5	NUCB2
3.87e-168	0.681922	0.25	0.001	1.3e-163	RTM_5	FCRL5
1.48e-08	0.710485	0.979	0.907	0.000496413	RTM_5	TPT1
2.82e-136	0.730457	0.271	0.002	9.46e-132	RTM_5	JSRP1
5.88e-08	0.806727	0.917	0.698	0.00197237	RTM_5	JUN
2.38e-192	0.806996	0.292	0.001	8e-188	RTM_5	TNFRSF17
1.08e-11	0.861346	0.875	0.37	3.64e-07	RTM_5	MTRNR2L8
2.77e-07	0.877501	1	0.87	0.00928658	RTM_5	HSP90AA1
7.65e-09	0.904629	0.896	0.535	0.000256447	RTM_5	HERPUD1
2.93e-08	0.938669	0.854	0.509	0.000981933	RTM_5	DNAJB1
6.46e-16	1.01713	0.688	0.213	2.17e-11	RTM_5	PRDX4
3.29e-141	1.08189	0.396	0.007	1.1e-136	RTM_5	CD79A
2.96e-54	1.09222	0.438	0.029	9.92e-50	RTM_5	ITM2C
2.75e-10	1.23568	0.75	0.378	9.24e-06	RTM_5	XBP1
2.35e-79	1.46331	0.542	0.03	7.88e-75	RTM_5	FKBP11
2.4e-263	1.60142	0.583	0.007	8.06e-259	RTM_5	DERL3
1.49e-31	1.69446	0.792	0.178	5.01e-27	RTM_5	SEC11C
3.22e-20	2.10871	0.938	0.608	1.08e-15	RTM_5	SSR4
2.21e-104	2.66141	0.271	0.004	7.41e-100	RTM_5	IGLL5
0	2.92386	0.792	0.009	0	RTM_5	MZB1
3.54e-132	3.91281	0.521	0.015	1.19e-127	RTM_5	JCHAIN
5.23e-118	4.83122	0.896	0.065	1.75e-113	RTM_5	IGHG4
4.5e-58	6.48457	0.5	0.037	1.51e-53	RTM_5	IGHM
1.64e-67	7.04487	0.896	0.131	5.5e-63	RTM_5	IGHG3
1.04e-40	7.0896	0.604	0.081	3.5e-36	RTM_5	IGLC3
8.13e-74	7.1545	0.917	0.124	2.73e-69	RTM_5	IGHG1
4.83e-27	7.85311	0.646	0.142	1.62e-22	RTM_5	IGLC2
7.32e-37	8.23425	0.958	0.345	2.45e-32	RTM_5	IGKC
p_val	avg_log2FC	pct.1	pct.2	p_val_adj	cluster	gene
2.94e-40	-3.18966	0.102	0.396	9.87e-36	TAM_1	IGKC
4.31e-38	-1.37093	0.156	0.415	1.45e-33	TAM_1	MTRNR2L8
4.36e-16	-1.20875	0.635	0.68	1.46e-11	TAM_1	LYZ
3.82e-21	-1.16565	0.109	0.288	1.28e-16	TAM_1	IL1B
1.49e-42	-1.09131	0.481	0.707	5e-38	TAM_1	HLA-DQA1
1.8e-64	-1.05261	0.636	0.868	6.05e-60	TAM_1	HLA-DPA1
2.13e-33	-1.0436	0.95	0.945	7.14e-29	TAM_1	MT-ATP6
1.68e-31	-1.03944	0.245	0.497	5.64e-27	TAM_1	NR4A2
1.79e-27	-1.03702	0.32	0.561	5.99e-23	TAM_1	MT2A
1.19e-27	-0.990314	0.2	0.432	3.98e-23	TAM_1	TNFAIP3
2.38e-40	-0.955928	0.144	0.444	7.97e-36	TAM_1	FGL2
3.46e-52	-0.955226	0.667	0.86	1.16e-47	TAM_1	HLA-DPB1
1.52e-22	-0.948855	0.343	0.543	5.08e-18	TAM_1	DNAJB1
5.15e-34	-0.948438	0.331	0.585	1.73e-29	TAM_1	HLA-DRB5
3.22e-40	-0.94088	0.429	0.702	1.08e-35	TAM_1	BTG1
1.1e-29	-0.938139	0.339	0.56	3.7e-25	TAM_1	FCGR3A
1.46e-32	-0.924208	0.224	0.488	4.9e-28	TAM_1	NAMPT
3.01e-27	-0.915411	0.156	0.382	1.01e-22	TAM_1	GPR183
8.45e-29	-0.910233	0.102	0.324	2.84e-24	TAM_1	IRF1
1.75e-23	-0.908031	0.326	0.536	5.87e-19	TAM_1	IER3
1.82e-35	-0.904117	0.11	0.369	6.11e-31	TAM_1	SERPINA1
1.05e-21	-0.903669	0.104	0.284	3.52e-17	TAM_1	GBP1
2.41e-50	-0.899132	0.881	0.958	8.09e-46	TAM_1	HLA-DRA
5.08e-25	-0.884844	0.089	0.281	1.7e-20	TAM_1	PPA1
3.02e-37	-0.879698	0.513	0.729	1.01e-32	TAM_1	HLA-DQB1
7.51e-23	-0.873001	0.37	0.566	2.52e-18	TAM_1	SOD2
4.69e-21	-0.869314	0.081	0.255	1.57e-16	TAM_1	TNFSF10
5.65e-23	-0.868515	0.148	0.35	1.89e-18	TAM_1	ZNF331
7.14e-34	-0.865682	0.253	0.524	2.39e-29	TAM_1	PNRC1
7.3e-27	-0.863256	0.346	0.573	2.45e-22	TAM_1	HERPUD1
4.71e-37	-0.833938	0.922	0.946	1.58e-32	TAM_1	MT-CYB
1.15e-23	-0.833773	0.177	0.392	3.85e-19	TAM_1	ATF3
1.87e-26	-0.832673	0.265	0.506	6.27e-22	TAM_1	GADD45B
5.67e-21	-0.829708	0.278	0.476	1.9e-16	TAM_1	CD83
9.72e-27	-0.823224	0.351	0.578	3.26e-22	TAM_1	FOSB
6.93e-25	-0.817916	0.537	0.743	2.32e-20	TAM_1	RGS1
3.46e-32	-0.816386	0.779	0.887	1.16e-27	TAM_1	HSP90AA1
7.63e-27	-0.799634	0.26	0.491	2.56e-22	TAM_1	TMEM176B
4.82e-30	-0.785701	0.239	0.492	1.62e-25	TAM_1	DNAJA1
1.95e-44	-0.782075	0.883	0.912	6.54e-40	TAM_1	TPT1
1.88e-30	-0.778209	0.13	0.374	6.32e-26	TAM_1	SERPING1
8.55e-27	-0.774417	0.219	0.455	2.87e-22	TAM_1	PPP1R15A
1.69e-23	-0.753004	0.334	0.56	5.68e-19	TAM_1	IER2
2.62e-48	-0.744709	0.808	0.933	8.78e-44	TAM_1	HLA-DRB1
2.13e-21	-0.744464	0.495	0.687	7.14e-17	TAM_1	NFKBIA
7.96e-25	-0.727875	0.308	0.535	2.67e-20	TAM_1	FCGR2A
1.16e-19	-0.718517	0.091	0.262	3.88e-15	TAM_1	KLF2
4.48e-29	-0.717299	0.403	0.66	1.5e-24	TAM_1	JUNB
3.26e-22	-0.711269	0.201	0.415	1.09e-17	TAM_1	REL
9.9e-07	-0.707086	0.274	0.375	0.033199	TAM_1	CCL4L2
9.03e-07	-0.705417	0.226	0.327	0.0302863	TAM_1	CXCL8
1.3e-21	-0.701152	0.573	0.723	4.36e-17	TAM_1	JUN
8.1e-21	-0.697242	0.195	0.403	2.72e-16	TAM_1	RGS2
1.71e-34	-0.696775	0.669	0.848	5.73e-30	TAM_1	SRGN
2.76e-21	-0.696082	0.097	0.283	9.25e-17	TAM_1	SLC2A3
1.11e-28	-0.684265	0.745	0.833	3.71e-24	TAM_1	C1QA
3.01e-22	-0.680776	0.281	0.504	1.01e-17	TAM_1	RHOB
1.79e-39	-0.673043	0.693	0.892	6e-35	TAM_1	H3F3B
1.75e-48	-0.670797	0.925	0.984	5.89e-44	TAM_1	CD74
1.89e-17	-0.670288	0.195	0.371	6.32e-13	TAM_1	CHMP1B
6.07e-24	-0.66476	0.625	0.768	2.04e-19	TAM_1	DUSP1
1.81e-20	-0.660085	0.271	0.477	6.06e-16	TAM_1	ATP1B3
1.04e-24	-0.655406	0.154	0.376	3.5e-20	TAM_1	MTRNR2L12
3.75e-22	-0.65504	0.123	0.321	1.26e-17	TAM_1	KLF4
4.22e-18	-0.652946	0.157	0.337	1.42e-13	TAM_1	IL4I1
1.93e-16	-0.644781	0.232	0.414	6.48e-12	TAM_1	EGR1
4.03e-24	-0.639673	0.235	0.473	1.35e-19	TAM_1	PSMB9
1.47e-17	-0.636305	0.292	0.49	4.92e-13	TAM_1	CXCR4
7.86e-38	-0.625978	0.756	0.886	2.64e-33	TAM_1	HLA-C
1.18e-17	-0.623545	0.252	0.439	3.97e-13	TAM_1	TSC22D3
3.42e-28	-0.620997	0.644	0.801	1.15e-23	TAM_1	UBC
1.76e-25	-0.61024	0.916	0.942	5.9e-21	TAM_1	MT-ND1
1.01e-23	-0.609787	0.156	0.374	3.38e-19	TAM_1	PLEKHO1
8.21e-09	-0.609328	0.396	0.527	0.000275227	TAM_1	CCL4
8.2e-17	-0.609283	0.133	0.298	2.75e-12	TAM_1	VAMP5
1.37e-13	-0.60453	0.115	0.251	4.59e-09	TAM_1	PRMT9
1.07e-13	-0.604277	0.117	0.252	3.58e-09	TAM_1	RANBP2
1.87e-15	-0.603922	0.209	0.38	6.28e-11	TAM_1	HSPH1
1.2e-16	-0.59692	0.2	0.375	4.03e-12	TAM_1	HSPD1
1.42e-28	-0.588175	0.984	0.986	4.77e-24	TAM_1	MT-ND4
1.85e-25	-0.583416	0.136	0.361	6.2e-21	TAM_1	GIMAP4
1.58e-18	-0.575513	0.487	0.662	5.3e-14	TAM_1	TXNIP
9.53e-19	-0.569619	0.427	0.621	3.2e-14	TAM_1	PSME2
1.32e-09	-0.557072	0.43	0.579	4.43e-05	TAM_1	C15orf48
1.01e-16	-0.549651	0.279	0.472	3.4e-12	TAM_1	MNDA
1.25e-15	-0.548378	0.357	0.538	4.19e-11	TAM_1	LDHA
3.68e-18	-0.544517	0.388	0.582	1.24e-13	TAM_1	CTSH
3.96e-19	-0.539288	0.391	0.582	1.33e-14	TAM_1	FYB1
6.84e-17	-0.534257	0.193	0.367	2.29e-12	TAM_1	ALDH2
3.73e-11	-0.533379	0.568	0.704	1.25e-06	TAM_1	KLF6
5.75e-14	-0.529988	0.362	0.537	1.93e-09	TAM_1	ZFP36L2
3.04e-20	-0.529354	0.674	0.8	1.02e-15	TAM_1	C1QB
4.77e-14	-0.529203	0.354	0.532	1.6e-09	TAM_1	ZFAND5
1.74e-12	-0.528011	0.438	0.574	5.85e-08	TAM_1	CTSC
6.78e-21	-0.52475	0.078	0.257	2.28e-16	TAM_1	RARRES3
3.69e-18	-0.523653	0.39	0.6	1.24e-13	TAM_1	RGS10
6.83e-13	-0.518462	0.399	0.564	2.29e-08	TAM_1	HNRNPU
1.1e-13	-0.517041	0.935	0.922	3.7e-09	TAM_1	MT-ND3
1.73e-15	-0.516241	0.289	0.472	5.8e-11	TAM_1	CYCS
4.68e-18	-0.510335	0.192	0.385	1.57e-13	TAM_1	CLEC2B
2.02e-09	-0.506721	0.299	0.434	6.78e-05	TAM_1	ZFP36
9.64e-17	-0.503223	0.232	0.421	3.23e-12	TAM_1	RASSF4
4.16e-14	0.511518	0.682	0.638	1.4e-09	TAM_1	UQCRQ
3.26e-13	0.518841	0.67	0.633	1.09e-08	TAM_1	ATP5ME
4.42e-10	0.53899	0.346	0.238	1.48e-05	TAM_1	SDS
3.35e-14	0.572621	0.701	0.654	1.12e-09	TAM_1	DBI
1.36e-13	0.577091	0.654	0.587	4.58e-09	TAM_1	TXN
8.37e-20	0.591401	0.739	0.699	2.81e-15	TAM_1	UQCR11
1.02e-09	0.600776	0.391	0.297	3.41e-05	TAM_1	S100A9
2.13e-15	0.606915	0.692	0.658	7.13e-11	TAM_1	CD9
1.67e-58	0.636515	1	0.999	5.59e-54	TAM_1	TMSB4X
1.37e-36	0.643828	0.966	0.861	4.61e-32	TAM_1	CTSD
2.44e-15	0.665959	0.619	0.554	8.19e-11	TAM_1	POLR2L
1.34e-10	0.667538	0.42	0.335	4.48e-06	TAM_1	SMS
1.7e-11	0.67418	0.489	0.412	5.71e-07	TAM_1	BLVRB
3.66e-39	0.69968	0.929	0.905	1.23e-34	TAM_1	CD63
1.18e-07	0.713987	0.269	0.19	0.00395019	TAM_1	CD52
2.6e-30	0.714328	0.721	0.536	8.72e-26	TAM_1	LGMN
5.42e-24	0.721073	0.659	0.565	1.82e-19	TAM_1	APLP2
1.46e-25	0.723655	0.596	0.417	4.91e-21	TAM_1	ACP5
7.31e-16	0.731743	0.578	0.489	2.45e-11	TAM_1	LY96
3.94e-25	0.737681	0.693	0.576	1.32e-20	TAM_1	NOP10
4.16e-15	0.747075	0.271	0.156	1.39e-10	TAM_1	SMIM25
1.11e-50	0.754285	0.992	0.884	3.71e-46	TAM_1	APOE
5.76e-07	0.767051	0.505	0.46	0.0193315	TAM_1	HMOX1
2.46e-17	0.777924	0.526	0.422	8.24e-13	TAM_1	CALM3
2.96e-64	0.78666	0.972	0.94	9.94e-60	TAM_1	LGALS1
5.26e-09	0.794447	0.744	0.66	0.000176308	TAM_1	SPP1
4.47e-61	0.812209	0.979	0.949	1.5e-56	TAM_1	PSAP
4.08e-43	0.906697	0.813	0.602	1.37e-38	TAM_1	GPNMB
1.15e-33	1.00329	0.542	0.335	3.87e-29	TAM_1	GCHFR
5.02e-24	1.01232	0.664	0.568	1.68e-19	TAM_1	FABP5
1.99e-80	1.16656	0.878	0.74	6.67e-76	TAM_1	CSTB
5.44e-117	1.20343	1	1	1.82e-112	TAM_1	FTL
7.1e-54	1.29164	0.318	0.101	2.38e-49	TAM_1	OTOA
1.38e-83	1.29431	0.968	0.818	4.64e-79	TAM_1	APOC1
2.65e-56	1.39042	0.614	0.401	8.9e-52	TAM_1	LIPA
p_val	avg_log2FC	pct.1	pct.2	p_val_adj	cluster	gene
7.67e-32	-3.43866	0.123	0.388	2.57e-27	TAM_2	IGKC
2.88e-41	-1.4468	0.279	0.583	9.65e-37	TAM_2	NUPR1
3.34e-34	-1.29671	0.395	0.656	1.12e-29	TAM_2	CTSL
1.72e-18	-1.28113	0.612	0.683	5.77e-14	TAM_2	LYZ
1.48e-15	-1.23306	0.138	0.299	4.95e-11	TAM_2	SELENOP
2.04e-42	-1.21449	0.174	0.488	6.83e-38	TAM_2	CFD
1.35e-55	-1.18066	0.606	0.784	4.54e-51	TAM_2	CTSZ
8.06e-36	-1.17932	0.202	0.481	2.7e-31	TAM_2	ACP5
2.16e-10	-1.13522	0.213	0.345	7.24e-06	TAM_2	CCL2
6.31e-35	-1.13039	0.318	0.607	2.12e-30	TAM_2	RNASE1
5.12e-54	-1.08706	0.784	0.879	1.72e-49	TAM_2	CTSB
1.31e-48	-1.06979	0.775	0.892	4.38e-44	TAM_2	CTSD
7.14e-19	-1.0572	0.224	0.4	2.39e-14	TAM_2	MTRNR2L8
5.17e-34	-1.03526	0.338	0.587	1.73e-29	TAM_2	CTSC
1.02e-30	-0.995299	0.343	0.598	3.43e-26	TAM_2	LGMN
1.22e-37	-0.975817	0.048	0.316	4.09e-33	TAM_2	C2
2.62e-34	-0.972297	0.279	0.551	8.77e-30	TAM_2	STAT1
1.01e-42	-0.971516	0.594	0.77	3.39e-38	TAM_2	GLUL
4.68e-23	-0.961579	0.174	0.396	1.57e-18	TAM_2	GCHFR
7.14e-34	-0.95596	0.406	0.669	2.39e-29	TAM_2	GPNMB
2.68e-14	-0.952176	0.376	0.548	8.99e-10	TAM_2	MT2A
8.41e-23	-0.935901	0.127	0.339	2.82e-18	TAM_2	S100A9
7.6e-35	-0.932293	0.102	0.374	2.55e-30	TAM_2	SERPING1
1.08e-20	-0.927875	0.959	0.944	3.61e-16	TAM_2	MT-ATP6
3.19e-36	-0.878446	0.299	0.624	1.07e-31	TAM_2	IFI27
7.45e-37	-0.864834	0.905	0.927	2.5e-32	TAM_2	MT-ND3
2.84e-17	-0.850582	0.422	0.608	9.51e-13	TAM_2	FABP5
1.41e-16	-0.789202	0.374	0.563	4.72e-12	TAM_2	FN1
6.68e-14	-0.785072	0.129	0.278	2.24e-09	TAM_2	GBP1
6.71e-23	-0.747338	0.694	0.863	2.25e-18	TAM_2	APOC1
4.25e-24	-0.746974	0.089	0.303	1.43e-19	TAM_2	VAMP5
1.53e-25	-0.734022	0.408	0.627	5.15e-21	TAM_2	LGALS3
4.13e-24	-0.733385	0.227	0.462	1.38e-19	TAM_2	AHNAK
5.65e-24	-0.722363	0.293	0.534	1.9e-19	TAM_2	PLD3
3.5e-07	-0.712486	0.585	0.686	0.0117476	TAM_2	SPP1
6.11e-08	-0.701949	0.674	0.775	0.00204841	TAM_2	CSTB
4.69e-25	-0.697873	0.213	0.466	1.57e-20	TAM_2	FPR3
2.71e-19	-0.695626	0.084	0.262	9.09e-15	TAM_2	TFRC
8.64e-18	-0.689841	0.369	0.552	2.9e-13	TAM_2	FCGR3A
4.63e-19	-0.678501	0.945	0.942	1.55e-14	TAM_2	MT-CYB
5.09e-18	-0.670248	0.233	0.425	1.71e-13	TAM_2	SNX10
2.84e-26	-0.668889	0.707	0.816	9.52e-22	TAM_2	PRDX1
9.89e-23	-0.664595	0.095	0.296	3.32e-18	TAM_2	KCNMA1
1.93e-23	-0.660952	0.594	0.716	6.48e-19	TAM_2	CTSS
4.35e-16	-0.650468	0.107	0.27	1.46e-11	TAM_2	SCD
7.94e-29	-0.646964	0.807	0.909	2.66e-24	TAM_2	S100A6
1.18e-19	-0.640246	0.463	0.665	3.96e-15	TAM_2	ATOX1
1.76e-35	-0.634676	0.996	0.996	5.89e-31	TAM_2	MT-CO3
5.94e-18	-0.634363	0.292	0.483	1.99e-13	TAM_2	TMEM176B
5.17e-17	-0.628977	0.15	0.335	1.73e-12	TAM_2	IL4I1
6.11e-17	-0.620177	0.247	0.445	2.05e-12	TAM_2	MS4A4A
1.25e-07	-0.611478	0.159	0.263	0.00420454	TAM_2	SLC40A1
1.66e-17	-0.610137	0.689	0.814	5.56e-13	TAM_2	S100A10
1.02e-30	-0.609558	1	1	3.43e-26	TAM_2	FTL
7.12e-20	-0.607899	0.125	0.327	2.39e-15	TAM_2	FLNA
2.01e-15	-0.600224	0.131	0.297	6.73e-11	TAM_2	CCR1
4.68e-20	-0.59797	0.456	0.678	1.57e-15	TAM_2	EMP3
1.21e-18	-0.596397	0.206	0.409	4.06e-14	TAM_2	TMEM176A
7.49e-17	-0.590206	0.206	0.401	2.51e-12	TAM_2	PLTP
4.08e-09	-0.586962	0.574	0.693	0.000136837	TAM_2	RPS27L
1.6e-13	-0.58347	0.411	0.571	5.35e-09	TAM_2	DAB2
2.13e-16	-0.582642	0.354	0.531	7.16e-12	TAM_2	BRI3
2.77e-17	-0.578241	0.138	0.324	9.3e-13	TAM_2	AC020656.1
3.18e-20	-0.567237	0.497	0.676	1.07e-15	TAM_2	CD81
2.44e-11	-0.555828	0.32	0.49	8.18e-07	TAM_2	HMOX1
5.99e-08	-0.547387	0.453	0.55	0.00200813	TAM_2	SOD2
4.98e-12	-0.543705	0.826	0.851	1.67e-07	TAM_2	VIM
2.12e-16	-0.542238	0.297	0.493	7.12e-12	TAM_2	TIMP2
4.96e-18	-0.536352	0.134	0.322	1.66e-13	TAM_2	GAA
2.65e-25	-0.536167	0.848	0.918	8.88e-21	TAM_2	CD63
1.7e-16	-0.535647	0.17	0.359	5.71e-12	TAM_2	GM2A
3.81e-17	-0.534418	0.159	0.348	1.28e-12	TAM_2	LHFPL2
3.15e-16	-0.532478	0.939	0.938	1.06e-11	TAM_2	MT-ND1
4.29e-18	-0.531787	0.152	0.348	1.44e-13	TAM_2	SCARB2
4.68e-14	-0.514162	0.177	0.342	1.57e-09	TAM_2	CD163
4.48e-14	-0.51378	0.116	0.27	1.5e-09	TAM_2	FUCA1
2.87e-16	-0.512377	0.399	0.607	9.63e-12	TAM_2	APLP2
7.83e-14	-0.512208	0.243	0.414	2.63e-09	TAM_2	HSPA5
2.16e-13	-0.501606	0.363	0.537	7.26e-09	TAM_2	MGST3
2.54e-17	-0.500991	0.156	0.343	8.51e-13	TAM_2	GNS
1.31e-29	0.500736	0.869	0.786	4.38e-25	TAM_2	RPL27
1.32e-19	0.505371	0.639	0.49	4.42e-15	TAM_2	CKLF
2.01e-25	0.511955	0.841	0.788	6.73e-21	TAM_2	RPL38
2.93e-37	0.518257	0.955	0.941	9.81e-33	TAM_2	RPS15A
2.8e-42	0.527007	0.97	0.946	9.37e-38	TAM_2	RPL15
1.13e-15	0.53726	0.61	0.506	3.81e-11	TAM_2	HNRNPA1
7.13e-09	0.540844	0.284	0.194	0.000239038	TAM_2	GPR34
1.4e-38	0.542301	0.95	0.927	4.68e-34	TAM_2	RPL27A
8.51e-31	0.543605	0.871	0.811	2.85e-26	TAM_2	RPS7
2.55e-48	0.543683	0.986	0.982	8.55e-44	TAM_2	RPS27
1.08e-37	0.545211	0.937	0.901	3.63e-33	TAM_2	RPS13
3.84e-10	0.548985	0.517	0.449	1.29e-05	TAM_2	CIRBP
6e-33	0.551549	0.871	0.802	2.01e-28	TAM_2	RPL6
3.48e-16	0.552444	0.651	0.556	1.17e-11	TAM_2	RGS10
8.78e-29	0.555749	0.803	0.657	2.94e-24	TAM_2	ATP5MC2
2.59e-36	0.55596	0.93	0.872	8.7e-32	TAM_2	RPS20
2.27e-21	0.556767	0.826	0.681	7.62e-17	TAM_2	JUN
5.56e-09	0.559336	0.46	0.395	0.000186611	TAM_2	EIF3E
2.12e-22	0.560612	0.605	0.391	7.12e-18	TAM_2	RPS17
1.46e-27	0.563572	0.866	0.802	4.89e-23	TAM_2	RACK1
1.15e-41	0.568716	0.984	0.958	3.86e-37	TAM_2	RPL34
2.6e-14	0.571324	0.626	0.486	8.72e-10	TAM_2	IER3
6.61e-11	0.576798	0.338	0.232	2.22e-06	TAM_2	SNHG8
3.1e-42	0.591022	0.943	0.896	1.04e-37	TAM_2	RPS3
5.62e-56	0.594302	0.971	0.955	1.89e-51	TAM_2	RPL12
6.37e-34	0.598629	0.868	0.776	2.14e-29	TAM_2	RPL23
9.41e-53	0.600809	0.979	0.97	3.15e-48	TAM_2	RPS2
5.07e-16	0.602299	0.488	0.345	1.7e-11	TAM_2	CORO1A
1.06e-23	0.604742	0.846	0.731	3.56e-19	TAM_2	DUSP1
9.09e-12	0.604874	0.61	0.528	3.05e-07	TAM_2	HERPUD1
2.62e-41	0.612473	0.902	0.847	8.79e-37	TAM_2	RPS3A
5.62e-41	0.613134	0.946	0.928	1.88e-36	TAM_2	RPS29
1.39e-43	0.613682	0.921	0.875	4.68e-39	TAM_2	RPS25
1.82e-07	0.618753	0.309	0.232	0.0061015	TAM_2	NFKBIZ
1.59e-16	0.619675	0.562	0.434	5.35e-12	TAM_2	ZFAS1
2.32e-12	0.619935	0.564	0.455	7.77e-08	TAM_2	GADD45B
6.32e-20	0.621002	0.719	0.628	2.12e-15	TAM_2	RPL4
1.95e-12	0.627486	0.648	0.532	6.54e-08	TAM_2	HLA-DRB5
5.17e-21	0.629241	0.651	0.529	1.73e-16	TAM_2	SLC25A6
1.7e-20	0.638538	0.599	0.452	5.71e-16	TAM_2	RPL36A
1.71e-17	0.645075	0.671	0.584	5.74e-13	TAM_2	ID2
1.6e-62	0.65164	0.986	0.971	5.35e-58	TAM_2	RPS18
4.28e-59	0.660653	0.979	0.943	1.44e-54	TAM_2	RPS4X
4.11e-15	0.663246	0.326	0.199	1.38e-10	TAM_2	OGFRL1
3.45e-09	0.664371	0.521	0.452	0.000115819	TAM_2	CXCR4
4.52e-10	0.667756	0.478	0.373	1.52e-05	TAM_2	EGR1
9.13e-55	0.670989	0.961	0.921	3.06e-50	TAM_2	RPS6
2.94e-51	0.677035	0.95	0.927	9.87e-47	TAM_2	RPL21
5.26e-20	0.681298	0.27	0.132	1.76e-15	TAM_2	NBEAL1
2.7e-14	0.682395	0.483	0.355	9.06e-10	TAM_2	RGS2
1.25e-20	0.682444	0.735	0.646	4.21e-16	TAM_2	NFKBIA
3.59e-20	0.682703	0.356	0.197	1.2e-15	TAM_2	LTC4S
3.83e-12	0.684211	0.34	0.229	1.29e-07	TAM_2	NR4A1
1.63e-14	0.687852	0.631	0.505	5.47e-10	TAM_2	HSPA1B
1.09e-12	0.689685	0.372	0.258	3.66e-08	TAM_2	PHACTR1
5.06e-26	0.698096	0.394	0.199	1.7e-21	TAM_2	RPL17
6.23e-17	0.719054	0.565	0.428	2.09e-12	TAM_2	CD83
6.88e-62	0.719113	0.957	0.901	2.31e-57	TAM_2	RPL26
2.95e-50	0.737797	0.903	0.79	9.9e-46	TAM_2	RPL10A
2.63e-23	0.750516	0.388	0.214	8.83e-19	TAM_2	C6orf48
1.43e-21	0.753748	0.333	0.171	4.78e-17	TAM_2	PKIB
4.93e-26	0.758296	0.735	0.604	1.65e-21	TAM_2	JUNB
9.84e-63	0.781521	0.925	0.85	3.3e-58	TAM_2	RPL3
2.55e-22	0.791695	0.696	0.586	8.56e-18	TAM_2	SGK1
4.21e-16	0.797122	0.281	0.154	1.41e-11	TAM_2	DUSP2
1.62e-74	0.800529	0.984	0.949	5.43e-70	TAM_2	RPL13A
7.96e-56	0.819595	0.889	0.8	2.67e-51	TAM_2	RPL23A
2.83e-14	0.824716	0.453	0.332	9.48e-10	TAM_2	GPR183
5.9e-57	0.841884	0.896	0.814	1.98e-52	TAM_2	RPL7
2.32e-51	0.843419	0.873	0.742	7.76e-47	TAM_2	RPL31
2.78e-28	0.846264	0.685	0.502	9.34e-24	TAM_2	IER2
1.25e-18	0.875909	0.456	0.315	4.19e-14	TAM_2	C3
1.77e-59	0.962392	0.936	0.834	5.94e-55	TAM_2	FOS
1.69e-38	1.03289	0.462	0.222	5.65e-34	TAM_2	MGP
5.62e-30	1.12713	0.297	0.118	1.88e-25	TAM_2	FCGBP
1.83e-44	1.20862	0.487	0.226	6.14e-40	TAM_2	IL1B
6.21e-52	1.24038	0.631	0.38	2.08e-47	TAM_2	ZFP36
8.58e-48	1.33961	0.71	0.476	2.88e-43	TAM_2	CCL4
3.7e-69	1.38327	0.826	0.695	1.24e-64	TAM_2	RGS1
2.4e-81	1.61988	0.413	0.117	8.06e-77	TAM_2	SCGB2A2
2.35e-39	1.74902	0.499	0.282	7.88e-35	TAM_2	CXCL8
2.4e-83	1.79827	0.809	0.52	8.04e-79	TAM_2	CCL3
1.62e-68	1.88116	0.628	0.318	5.43e-64	TAM_2	CCL4L2
1.16e-117	2.52173	0.649	0.239	3.88e-113	TAM_2	CCL3L1
p_val	avg_log2FC	pct.1	pct.2	p_val_adj	cluster	gene
1.91e-104	-2.93914	0.055	0.614	6.41e-100	TAM_3	HLA-DRB5
2.61e-73	-2.50069	0.325	0.72	8.74e-69	TAM_3	LYZ
5.55e-139	-2.29806	0.68	0.957	1.86e-134	TAM_3	MT-ND3
1.96e-128	-2.28283	0.791	0.967	6.59e-124	TAM_3	MT-ATP6
2.91e-39	-2.08621	0.024	0.311	9.77e-35	TAM_3	SELENOP
1.37e-06	-1.9981	0.398	0.347	0.0460163	TAM_3	IGKC
1.51e-55	-1.87536	0.043	0.421	5.07e-51	TAM_3	MTRNR2L8
5.49e-72	-1.69859	0.071	0.536	1.84e-67	TAM_3	A2M
5.96e-66	-1.57915	0.327	0.72	2e-61	TAM_3	HLA-DQA1
4.62e-88	-1.54716	0.604	0.88	1.55e-83	TAM_3	VIM
1.77e-139	-1.50127	0.988	0.998	5.95e-135	TAM_3	MT-CO3
4.71e-86	-1.49936	0.345	0.788	1.58e-81	TAM_3	MT-ND5
1.36e-100	-1.43051	0.724	0.932	4.57e-96	TAM_3	TPT1
4.27e-82	-1.4229	0.87	0.957	1.43e-77	TAM_3	HLA-DRA
5.73e-73	-1.39016	0.205	0.695	1.92e-68	TAM_3	ITGB2
4.38e-53	-1.3569	0.105	0.505	1.47e-48	TAM_3	TMEM176B
2.38e-31	-1.33885	0.03	0.278	8e-27	TAM_3	SLC40A1
4.88e-66	-1.31741	0.32	0.748	1.64e-61	TAM_3	HLA-DQB1
2.66e-38	-1.27356	0.065	0.37	8.91e-34	TAM_3	C3
6.32e-55	-1.26634	0.166	0.601	2.12e-50	TAM_3	DAB2
1.9e-42	-1.25518	0.136	0.488	6.36e-38	TAM_3	CFD
9.99e-86	-1.25312	0.554	0.895	3.35e-81	TAM_3	RPS3A
2.48e-61	-1.24818	0.166	0.634	8.32e-57	TAM_3	GSN
7.9e-63	-1.2426	0.609	0.861	2.65e-58	TAM_3	HLA-DPB1
1.81e-92	-1.18575	0.949	0.99	6.06e-88	TAM_3	MT-ND4
2.83e-42	-1.14731	0.592	0.866	9.48e-38	TAM_3	S100A4
1.83e-36	-1.11962	0.079	0.387	6.13e-32	TAM_3	CEBPD
3.16e-55	-1.11838	0.905	0.947	1.06e-50	TAM_3	MT-CYB
3.63e-41	-1.0932	0.057	0.382	1.22e-36	TAM_3	MTRNR2L12
8.04e-34	-1.09302	0.379	0.668	2.7e-29	TAM_3	GPNMB
3.03e-47	-1.09212	0.499	0.795	1.02e-42	TAM_3	CTSZ
1.64e-41	-1.09161	0.746	0.883	5.49e-37	TAM_3	CTSB
6.45e-90	-1.06923	0.992	0.999	2.16e-85	TAM_3	MT-CO1
1.94e-50	-1.05673	0.114	0.524	6.51e-46	TAM_3	PPT1
2.87e-49	-1.05549	0.085	0.477	9.63e-45	TAM_3	AHNAK
6.54e-45	-1.04736	0.199	0.588	2.19e-40	TAM_3	HLA-DMB
5.85e-43	-1.04258	0.185	0.573	1.96e-38	TAM_3	CYBB
3.83e-31	-0.985883	0.055	0.32	1.28e-26	TAM_3	STAB1
1.67e-23	-0.978206	0.061	0.274	5.59e-19	TAM_3	HTRA1
1.74e-35	-0.977811	0.095	0.413	5.84e-31	TAM_3	PLTP
1.94e-41	-0.975241	0.684	0.853	6.5e-37	TAM_3	HLA-DPA1
4.75e-40	-0.972013	0.083	0.422	1.59e-35	TAM_3	TMEM176A
1.24e-37	-0.932104	0.185	0.544	4.15e-33	TAM_3	FCGR2A
6.37e-41	-0.923768	0.205	0.591	2.14e-36	TAM_3	PABPC1
7.22e-31	-0.919604	0.03	0.279	2.42e-26	TAM_3	FUCA1
1.75e-29	-0.919375	0.024	0.259	5.86e-25	TAM_3	HLA-DQA2
3.15e-47	-0.919114	0.095	0.485	1.06e-42	TAM_3	ATP6AP2
2.13e-37	-0.911816	0.065	0.378	7.16e-33	TAM_3	ALDH2
1.01e-49	-0.901826	0.481	0.847	3.38e-45	TAM_3	RPL22
9.76e-43	-0.894914	0.095	0.458	3.27e-38	TAM_3	PLXDC2
2.89e-46	-0.87768	0.619	0.893	9.68e-42	TAM_3	RPL3
2.02e-40	-0.876758	0.099	0.452	6.77e-36	TAM_3	MT-ND4L
1.05e-38	-0.869624	0.112	0.462	3.54e-34	TAM_3	P4HB
9.9e-42	-0.869434	0.897	0.944	3.32e-37	TAM_3	MT-ND1
2.51e-85	-0.866902	0.895	0.981	8.43e-81	TAM_3	EEF1A1
8.98e-37	-0.861098	0.229	0.601	3.01e-32	TAM_3	XIST
1.94e-11	-0.858134	0.385	0.558	6.49e-07	TAM_3	FN1
1.5e-45	-0.854389	0.507	0.85	5.03e-41	TAM_3	RPL7A
8.35e-25	-0.852288	0.063	0.293	2.8e-20	TAM_3	MAF
5.34e-28	-0.851495	0.262	0.577	1.79e-23	TAM_3	HERPUD1
9.06e-41	-0.841203	0.467	0.832	3.04e-36	TAM_3	RPL23
2.01e-28	-0.835003	0.061	0.314	6.73e-24	TAM_3	CPM
2.8e-40	-0.83095	0.355	0.745	9.4e-36	TAM_3	HLA-DMA
1.84e-33	-0.830396	0.112	0.428	6.17e-29	TAM_3	HSPA5
3.75e-26	-0.824696	0.391	0.669	1.26e-21	TAM_3	TXNIP
7e-30	-0.823037	0.053	0.31	2.35e-25	TAM_3	C2
1.83e-50	-0.819478	0.635	0.886	6.13e-46	TAM_3	ACTG1
1.3e-40	-0.816562	0.438	0.798	4.35e-36	TAM_3	RPL5
6.83e-54	-0.815027	0.781	0.961	2.29e-49	TAM_3	RPS27A
3e-27	-0.80254	0.207	0.508	1.01e-22	TAM_3	RPL36A
5.48e-41	-0.801196	0.166	0.56	1.84e-36	TAM_3	EEF2
1.75e-33	-0.788373	0.858	0.947	5.86e-29	TAM_3	NEAT1
3.6e-32	-0.78782	0.126	0.442	1.21e-27	TAM_3	SLCO2B1
2.99e-34	-0.785628	0.018	0.278	1e-29	TAM_3	HLA-DOA
4.47e-36	-0.785596	0.053	0.351	1.5e-31	TAM_3	CYFIP1
8.56e-33	-0.785104	0.049	0.325	2.87e-28	TAM_3	CPVL
5.41e-32	-0.780061	0.32	0.683	1.81e-27	TAM_3	ALOX5AP
2.3e-40	-0.778093	0.86	0.966	7.72e-36	TAM_3	PSAP
8.7e-31	-0.774791	0.252	0.599	2.92e-26	TAM_3	LITAF
1.43e-28	-0.769479	0.028	0.26	4.79e-24	TAM_3	ITGAV
1.5e-58	-0.768951	0.862	0.987	5.04e-54	TAM_3	RPL13
6.89e-35	-0.768864	0.27	0.644	2.31e-30	TAM_3	COTL1
9.33e-31	-0.761468	0.114	0.416	3.13e-26	TAM_3	AKR1B1
4.15e-24	-0.759462	0.185	0.467	1.39e-19	TAM_3	LIPA
1.19e-35	-0.757891	0.13	0.476	3.98e-31	TAM_3	RBM3
2.08e-29	-0.75059	0.034	0.277	6.99e-25	TAM_3	ZFHX3
6.03e-16	-0.745327	0.343	0.563	2.02e-11	TAM_3	SOD2
5.35e-47	-0.736219	0.734	0.952	1.79e-42	TAM_3	RPS24
8.67e-27	-0.735751	0.043	0.275	2.91e-22	TAM_3	LTA4H
2.07e-26	-0.719328	0.077	0.33	6.96e-22	TAM_3	FLNA
2.43e-43	-0.71925	0.611	0.893	8.15e-39	TAM_3	RPL9
9.72e-33	-0.716187	0.501	0.819	3.26e-28	TAM_3	RPS21
1.01e-27	-0.709756	0.053	0.298	3.38e-23	TAM_3	KCNMA1
1.08e-30	-0.698972	0.093	0.386	3.62e-26	TAM_3	RAB32
1.03e-35	-0.692505	0.769	0.952	3.44e-31	TAM_3	RPL21
3.92e-37	-0.682878	0.643	0.919	1.31e-32	TAM_3	RPS11
1.2e-30	-0.681712	0.059	0.329	4.03e-26	TAM_3	EIF3L
1.07e-31	-0.679086	0.26	0.629	3.57e-27	TAM_3	EEF1B2
1.47e-29	-0.678768	0.213	0.552	4.94e-25	TAM_3	ZFP36L2
4.86e-31	-0.67437	0.438	0.76	1.63e-26	TAM_3	RAC1
4.06e-35	-0.66497	0.708	0.932	1.36e-30	TAM_3	RPS13
5.82e-45	-0.664071	0.864	0.977	1.95e-40	TAM_3	RPS12
8.87e-31	-0.659875	0.381	0.742	2.98e-26	TAM_3	TSPO
5.14e-29	-0.657551	0.27	0.619	1.72e-24	TAM_3	GNAI2
1.41e-28	-0.65346	0.065	0.328	4.74e-24	TAM_3	GAA
1.19e-14	-0.650561	0.349	0.551	4e-10	TAM_3	FCGR3A
2.87e-29	-0.644542	0.211	0.552	9.62e-25	TAM_3	PGK1
4.92e-25	-0.638519	0.302	0.626	1.65e-20	TAM_3	RPS10
4.02e-32	-0.636157	0.858	0.967	1.35e-27	TAM_3	RPS8
3.22e-29	-0.63373	0.183	0.514	1.08e-24	TAM_3	ARL6IP5
8.55e-30	-0.627568	0.219	0.572	2.87e-25	TAM_3	RTN4
1.11e-40	-0.62162	0.872	0.98	3.72e-36	TAM_3	RPS28
8.75e-30	-0.621137	0.126	0.435	2.94e-25	TAM_3	PDIA3
4.17e-29	-0.620782	0.148	0.464	1.4e-24	TAM_3	CD84
3.45e-28	-0.620761	0.276	0.643	1.16e-23	TAM_3	CAP1
3.05e-35	-0.620129	0.751	0.957	1.02e-30	TAM_3	RPL18A
7.28e-26	-0.619324	0.083	0.338	2.44e-21	TAM_3	DPYSL2
2.37e-24	-0.608856	0.041	0.255	7.94e-20	TAM_3	TBXAS1
6.84e-27	-0.605527	0.028	0.252	2.29e-22	TAM_3	PFKL
4.26e-27	-0.59938	0.073	0.331	1.43e-22	TAM_3	MYH9
8.57e-21	-0.598531	0.564	0.838	2.88e-16	TAM_3	RPL10A
1.2e-20	-0.598487	0.185	0.448	4.03e-16	TAM_3	LMNA
3.21e-36	-0.598424	0.799	0.961	1.08e-31	TAM_3	RPS23
1.07e-26	-0.589843	0.061	0.309	3.58e-22	TAM_3	PABPC4
4.37e-29	-0.581463	0.217	0.569	1.47e-24	TAM_3	ACTR2
2.61e-25	-0.580358	0.045	0.271	8.75e-21	TAM_3	MPEG1
2.13e-26	-0.578794	0.099	0.368	7.16e-22	TAM_3	SERPINF1
3.06e-22	-0.577934	0.075	0.299	1.02e-17	TAM_3	SORL1
4.21e-21	-0.577607	0.059	0.263	1.41e-16	TAM_3	FRMD4A
1.31e-24	-0.577145	0.075	0.318	4.38e-20	TAM_3	CD59
2.94e-25	-0.574903	0.209	0.526	9.85e-21	TAM_3	CCNI
6.34e-24	-0.5737	0.061	0.29	2.13e-19	TAM_3	SPRED1
3.78e-26	-0.572716	0.03	0.251	1.27e-21	TAM_3	TTC3
3.4e-24	-0.571602	0.073	0.311	1.14e-19	TAM_3	PRNP
1.77e-23	-0.568314	0.57	0.844	5.92e-19	TAM_3	RPL6
6.06e-32	-0.567556	0.959	0.978	2.03e-27	TAM_3	CD74
2.57e-24	-0.567363	0.237	0.562	8.63e-20	TAM_3	NAP1L1
1.34e-21	-0.566228	0.444	0.747	4.5e-17	TAM_3	RPS26
1.15e-22	-0.565762	0.233	0.531	3.87e-18	TAM_3	LIMS1
2.68e-20	-0.564752	0.057	0.255	8.97e-16	TAM_3	RANBP2
3.67e-26	-0.559715	0.122	0.403	1.23e-21	TAM_3	CD99
2.07e-27	-0.559298	0.728	0.9	6.96e-23	TAM_3	RPL30
4.53e-22	-0.558362	0.398	0.695	1.52e-17	TAM_3	FCGRT
1.14e-22	-0.557607	0.353	0.679	3.83e-18	TAM_3	RPL4
3.09e-24	-0.557231	0.057	0.284	1.04e-19	TAM_3	EIF4B
1.14e-19	-0.553327	0.093	0.307	3.83e-15	TAM_3	GYPC
1.43e-23	-0.551758	0.148	0.426	4.8e-19	TAM_3	RASSF4
6.2e-22	-0.550453	0.073	0.293	2.08e-17	TAM_3	TGFBR1
9.86e-24	-0.550413	0.053	0.273	3.31e-19	TAM_3	PRCP
3.15e-24	-0.54936	0.057	0.284	1.06e-19	TAM_3	ITGAM
3.68e-22	-0.54805	0.262	0.573	1.24e-17	TAM_3	HSP90B1
1.06e-27	-0.546831	0.68	0.921	3.54e-23	TAM_3	RPL18
3.48e-22	-0.543375	0.649	0.896	1.17e-17	TAM_3	RPL35A
1.87e-24	-0.542635	0.142	0.426	6.28e-20	TAM_3	LCP1
1.68e-25	-0.538941	0.114	0.389	5.62e-21	TAM_3	EIF5A
2.15e-22	-0.538917	0.755	0.929	7.21e-18	TAM_3	RPL26
1.99e-23	-0.537527	0.043	0.254	6.68e-19	TAM_3	CALU
5.77e-27	-0.53569	0.099	0.378	1.94e-22	TAM_3	DSTN
5.01e-26	-0.52747	0.572	0.854	1.68e-21	TAM_3	C1QA
2.83e-27	-0.524525	0.897	0.978	9.48e-23	TAM_3	RPL39
1.4e-13	-0.522014	0.254	0.473	4.7e-09	TAM_3	CD83
1.53e-20	-0.520514	0.203	0.48	5.12e-16	TAM_3	ATP1B3
5.34e-22	-0.5193	0.884	0.972	1.79e-17	TAM_3	RPL34
3.38e-17	-0.516252	0.193	0.431	1.13e-12	TAM_3	MEF2C
2.26e-23	-0.51236	0.093	0.34	7.59e-19	TAM_3	EIF3F
2.23e-24	-0.511158	0.093	0.348	7.48e-20	TAM_3	GNS
1.86e-24	-0.511066	0.217	0.537	6.23e-20	TAM_3	GNAS
3.12e-23	-0.510193	0.138	0.411	1.05e-18	TAM_3	PRRC2C
8.25e-20	-0.509287	0.337	0.635	2.77e-15	TAM_3	CALR
2.36e-16	-0.506997	0.513	0.725	7.91e-12	TAM_3	CTSS
1.1e-23	-0.505198	0.864	0.97	3.69e-19	TAM_3	RPL12
6.77e-21	-0.503435	0.075	0.291	2.27e-16	TAM_3	WASF2
1.1e-24	-0.503039	0.049	0.275	3.7e-20	TAM_3	ALOX5
3.5e-25	-0.502853	0.105	0.376	1.17e-20	TAM_3	RBPJ
1.51e-09	-0.500484	0.3	0.481	5.07e-05	TAM_3	NR4A2
1.72e-13	0.506535	0.748	0.708	5.78e-09	TAM_3	RGS1
2.39e-12	0.518414	0.767	0.733	8.01e-08	TAM_3	TYMP
7.5e-35	0.530346	0.911	0.889	2.51e-30	TAM_3	PFN1
4.15e-12	0.534144	0.677	0.74	1.39e-07	TAM_3	ATP6V0E1
4.74e-40	0.540971	0.99	0.96	1.59e-35	TAM_3	HLA-B
4.51e-17	0.555703	0.753	0.775	1.51e-12	TAM_3	DYNLL1
7.21e-07	0.578135	0.515	0.551	0.0241744	TAM_3	SUB1
3.32e-10	0.59649	0.629	0.549	1.11e-05	TAM_3	CCL3
2.64e-07	0.607308	0.511	0.545	0.00884256	TAM_3	MYL12B
2.18e-15	0.607651	0.651	0.652	7.32e-11	TAM_3	CLIC1
3.07e-09	0.610882	0.566	0.552	0.000102948	TAM_3	CTSC
1.55e-13	0.61885	0.665	0.555	5.19e-09	TAM_3	RNASE1
1.83e-28	0.619965	0.907	0.81	6.13e-24	TAM_3	SRGN
1.29e-11	0.625579	0.615	0.578	4.33e-07	TAM_3	FABP5
4.77e-15	0.627102	0.6	0.502	1.6e-10	TAM_3	DNAJB1
3.06e-10	0.629581	0.592	0.598	1.03e-05	TAM_3	TXN
9.38e-26	0.633302	0.781	0.794	3.14e-21	TAM_3	CALM2
2.21e-07	0.637058	0.529	0.567	0.00739886	TAM_3	SKP1
6.14e-24	0.653581	0.726	0.701	2.06e-19	TAM_3	COX7A2
1.93e-24	0.657016	0.746	0.737	6.47e-20	TAM_3	COX6C
2.89e-09	0.681408	0.517	0.522	9.69e-05	TAM_3	HMGN2
1.79e-38	0.685998	0.931	0.928	6e-34	TAM_3	FCER1G
4.14e-57	0.690055	0.978	0.962	1.39e-52	TAM_3	S100A11
1.68e-23	0.69156	0.781	0.779	5.63e-19	TAM_3	UBB
7.54e-17	0.696112	0.817	0.844	2.53e-12	TAM_3	APOC1
2.11e-15	0.696618	0.531	0.404	7.07e-11	TAM_3	RPS17
2.63e-14	0.697847	0.673	0.707	8.82e-10	TAM_3	CD68
4e-10	0.709857	0.353	0.261	1.34e-05	TAM_3	IFI44L
7.28e-14	0.713792	0.556	0.476	2.44e-09	TAM_3	MIF
9.61e-18	0.73062	0.602	0.585	3.22e-13	TAM_3	GNG5
4.14e-09	0.746709	0.418	0.365	0.000138773	TAM_3	COX17
6.1e-22	0.746899	0.645	0.595	2.05e-17	TAM_3	COX6A1
9.09e-57	0.750262	0.972	0.977	3.05e-52	TAM_3	TYROBP
5.52e-17	0.751958	0.58	0.506	1.85e-12	TAM_3	STAT1
8.96e-08	0.755117	0.422	0.395	0.00300485	TAM_3	ERH
6.84e-07	0.767127	0.288	0.23	0.0229443	TAM_3	MRPL27
1.03e-16	0.768323	0.69	0.654	3.45e-12	TAM_3	NFKBIA
3.32e-102	0.788828	1	0.997	1.11e-97	TAM_3	TMSB10
6.58e-11	0.788904	0.46	0.415	2.21e-06	TAM_3	TRMT112
8.05e-22	0.789669	0.627	0.575	2.7e-17	TAM_3	BST2
2.86e-12	0.807044	0.509	0.491	9.59e-08	TAM_3	LAPTM4A
1.87e-49	0.811274	0.905	0.856	6.26e-45	TAM_3	H3F3B
4.89e-07	0.81147	0.436	0.43	0.0164141	TAM_3	HCST
8.68e-40	0.835315	0.769	0.709	2.91e-35	TAM_3	PSMA7
1.38e-06	0.836495	0.26	0.205	0.0462628	TAM_3	RAB5IF
7.64e-24	0.838249	0.637	0.507	2.56e-19	TAM_3	HSPA1B
2.87e-72	0.841233	0.99	0.947	9.63e-68	TAM_3	SAT1
1.3e-06	0.854378	0.363	0.342	0.0436472	TAM_3	RHEB
7.83e-11	0.859424	0.481	0.473	2.63e-06	TAM_3	PRR13
4.12e-09	0.86488	0.312	0.24	0.00013809	TAM_3	XAF1
3.62e-127	0.869594	1	1	1.21e-122	TAM_3	B2M
8.68e-61	0.872381	0.937	0.857	2.91e-56	TAM_3	HLA-C
1.89e-23	0.873692	0.659	0.635	6.33e-19	TAM_3	ATOX1
3.71e-30	0.87685	0.665	0.606	1.24e-25	TAM_3	RBX1
2.36e-12	0.899529	0.316	0.222	7.9e-08	TAM_3	MRPS18C
1.73e-08	0.907763	0.345	0.294	0.000579364	TAM_3	CARD16
2.28e-07	0.931075	0.318	0.269	0.00763373	TAM_3	CCR1
8.94e-10	0.934474	0.298	0.22	3e-05	TAM_3	SPATS2L
1.27e-08	0.935388	0.341	0.295	0.000426114	TAM_3	CD47
1.19e-44	0.946295	0.803	0.737	3.99e-40	TAM_3	ATP6V1F
9.46e-40	0.959642	0.708	0.576	3.17e-35	TAM_3	PSME2
6.64e-20	0.970719	0.533	0.472	2.23e-15	TAM_3	TNFSF13B
8.87e-11	0.971156	0.29	0.206	2.98e-06	TAM_3	RNF114
1.25e-17	0.976375	0.544	0.498	4.21e-13	TAM_3	HSPE1
3.11e-16	0.978162	0.272	0.153	1.04e-11	TAM_3	KRT18
7e-24	0.986995	0.609	0.575	2.35e-19	TAM_3	ATP6V1G1
1.16e-08	1.00144	0.26	0.185	0.000389122	TAM_3	CNIH4
1.34e-24	1.01501	0.56	0.47	4.5e-20	TAM_3	C1orf162
8.69e-18	1.03339	0.499	0.422	2.92e-13	TAM_3	FPR3
5.74e-11	1.0452	0.308	0.223	1.93e-06	TAM_3	SLC11A1
7.53e-19	1.05758	0.284	0.155	2.53e-14	TAM_3	PLA2G16
3.67e-10	1.06505	0.412	0.357	1.23e-05	TAM_3	TIMP1
1.83e-15	1.06927	0.335	0.23	6.15e-11	TAM_3	CD48
3.6e-20	1.0752	0.276	0.142	1.21e-15	TAM_3	OAS2
6.78e-07	1.07824	0.544	0.542	0.0227439	TAM_3	NUPR1
7.12e-20	1.1145	0.402	0.28	2.39e-15	TAM_3	CHMP5
1.31e-15	1.11499	0.339	0.219	4.39e-11	TAM_3	MT1X
1.51e-29	1.11996	0.594	0.469	5.08e-25	TAM_3	PLAUR
2.76e-30	1.12288	0.542	0.418	9.26e-26	TAM_3	PSMA4
6.24e-21	1.12491	0.444	0.336	2.09e-16	TAM_3	SSB
6.9e-14	1.12915	0.288	0.184	2.32e-09	TAM_3	TRIM22
2.5e-23	1.13483	0.363	0.215	8.39e-19	TAM_3	SP110
1.09e-30	1.15752	0.31	0.134	3.67e-26	TAM_3	MX2
3.56e-32	1.19376	0.558	0.421	1.2e-27	TAM_3	PSMB9
4.64e-64	1.20826	0.533	0.217	1.56e-59	TAM_3	MGP
6.22e-28	1.2242	0.416	0.252	2.09e-23	TAM_3	COMT
5.99e-55	1.25275	0.728	0.575	2.01e-50	TAM_3	NOP10
1.92e-69	1.31171	0.781	0.669	6.44e-65	TAM_3	MYL12A
7.89e-26	1.3152	0.284	0.133	2.65e-21	TAM_3	CALHM6
1.96e-31	1.32455	0.505	0.361	6.57e-27	TAM_3	BAX
2.85e-85	1.37423	0.878	0.705	9.55e-81	TAM_3	HSPB1
4.08e-31	1.37957	0.424	0.253	1.37e-26	TAM_3	VAMP5
3.08e-36	1.38438	0.485	0.31	1.03e-31	TAM_3	UBE2L6
6.61e-43	1.40318	0.542	0.338	2.22e-38	TAM_3	IFI30
6.4e-45	1.40361	0.513	0.306	2.15e-40	TAM_3	EPSTI1
1.73e-53	1.40438	0.3	0.084	5.8e-49	TAM_3	HERC5
1.05e-41	1.40721	0.339	0.134	3.53e-37	TAM_3	IRF7
7.59e-41	1.45235	0.45	0.228	2.55e-36	TAM_3	SDS
2.38e-83	1.48687	0.266	0.04	7.98e-79	TAM_3	OASL
4.54e-58	1.48729	0.381	0.127	1.52e-53	TAM_3	IL1RN
3.5e-78	1.4893	0.3	0.058	1.17e-73	TAM_3	GSTM3
1.55e-44	1.49322	0.396	0.176	5.19e-40	TAM_3	IFI35
2.06e-72	1.51094	0.785	0.526	6.91e-68	TAM_3	C15orf48
3.11e-51	1.52302	0.493	0.254	1.04e-46	TAM_3	PLSCR1
6.9e-56	1.52354	0.572	0.333	2.32e-51	TAM_3	DRAP1
4.84e-64	1.53455	0.521	0.234	1.62e-59	TAM_3	MX1
8.85e-94	1.61389	0.318	0.054	2.97e-89	TAM_3	USP18
2.27e-135	1.62297	0.308	0.027	7.61e-131	TAM_3	UBE2C
2.03e-79	1.64142	0.779	0.663	6.8e-75	TAM_3	RPS27L
2.94e-58	1.65909	0.564	0.319	9.86e-54	TAM_3	DYNLT1
1.46e-105	1.66183	0.886	0.538	4.89e-101	TAM_3	IFI27
3.31e-65	1.70932	0.55	0.273	1.11e-60	TAM_3	IFITM2
2.16e-146	1.95177	0.448	0.07	7.26e-142	TAM_3	AGR2
6.83e-85	1.98959	0.511	0.191	2.29e-80	TAM_3	TNFSF10
1.37e-133	2.03095	0.426	0.07	4.61e-129	TAM_3	RSAD2
1.06e-121	2.05997	0.452	0.097	3.56e-117	TAM_3	NT5C3A
1.45e-105	2.06831	0.544	0.181	4.87e-101	TAM_3	OAS1
7.94e-135	2.11922	0.864	0.479	2.66e-130	TAM_3	MT2A
1.8e-204	2.13865	0.982	0.583	6.02e-200	TAM_3	IFI6
8.52e-130	2.1453	0.582	0.168	2.86e-125	TAM_3	IFIT3
7.69e-176	2.18154	0.911	0.493	2.58e-171	TAM_3	LY6E
6.16e-111	2.21142	0.578	0.169	2.07e-106	TAM_3	CXCL10
1.54e-166	2.32029	0.527	0.095	5.17e-162	TAM_3	IFIT2
5.03e-88	2.34013	0.781	0.599	1.69e-83	TAM_3	CTSL
1.2e-194	2.45246	0.572	0.094	4.02e-190	TAM_3	IFIT1
4.5e-222	2.52492	0.974	0.595	1.51e-217	TAM_3	IFITM3
4.26e-254	2.5646	0.434	0.022	1.43e-249	TAM_3	APOBEC3A
1.29e-214	2.65751	0.609	0.099	4.32e-210	TAM_3	ISG20
2.77e-203	3.10777	0.817	0.26	9.29e-199	TAM_3	CCL2
4.44e-274	3.4526	0.988	0.488	1.49e-269	TAM_3	ISG15
2.93e-170	3.65838	0.347	0.026	9.82e-166	TAM_3	CCL7
0	3.72355	0.832	0.044	0	TAM_3	IFITM1
1.43e-229	3.93805	0.55	0.066	4.78e-225	TAM_3	CCL8
p_val	avg_log2FC	pct.1	pct.2	p_val_adj	cluster	gene
7.67e-38	-3.63527	0.064	0.388	2.57e-33	TAM_4	IGKC
1.37e-97	-3.21488	0.216	0.729	4.58e-93	TAM_4	LYZ
5.1e-85	-2.5548	0.091	0.604	1.71e-80	TAM_4	HLA-DRB5
2.73e-76	-2.48086	0.102	0.596	9.17e-72	TAM_4	NUPR1
4.46e-44	-2.35309	0.02	0.347	1.5e-39	TAM_4	CXCL8
4.07e-82	-2.24221	0.075	0.593	1.36e-77	TAM_4	SOD2
1.19e-52	-1.90946	0.035	0.418	3.99e-48	TAM_4	MTRNR2L8
3.41e-96	-1.87466	0.272	0.805	1.14e-91	TAM_4	DUSP1
7.77e-49	-1.85971	0.203	0.602	2.61e-44	TAM_4	CCL3
1.62e-71	-1.84234	0.874	0.955	5.45e-67	TAM_4	MT-ATP6
7.16e-56	-1.84065	0.04	0.442	2.4e-51	TAM_4	TNFAIP3
1.84e-57	-1.79101	0.084	0.505	6.17e-53	TAM_4	NR4A2
6.13e-48	-1.78421	0.068	0.442	2.06e-43	TAM_4	PLIN2
1.54e-59	-1.7764	0.064	0.493	5.17e-55	TAM_4	CFD
3.4e-64	-1.76104	0.117	0.578	1.14e-59	TAM_4	FCGR3A
7.29e-66	-1.75843	0.051	0.507	2.44e-61	TAM_4	TMEM176B
1.05e-62	-1.75485	0.053	0.495	3.51e-58	TAM_4	CD83
1.03e-33	-1.72071	0.018	0.284	3.44e-29	TAM_4	CXCL2
2.07e-101	-1.66888	0.773	0.963	6.93e-97	TAM_4	MT-CYB
2.91e-52	-1.66877	0.141	0.55	9.76e-48	TAM_4	IER3
2.7e-48	-1.66473	0.236	0.609	9.07e-44	TAM_4	RNASE1
6.21e-58	-1.64118	0.36	0.712	2.08e-53	TAM_4	HLA-DQA1
1.07e-59	-1.63052	0.148	0.593	3.58e-55	TAM_4	FOSB
1.3e-54	-1.59409	0.291	0.676	4.35e-50	TAM_4	GPNMB
4.86e-44	-1.57135	0.071	0.426	1.63e-39	TAM_4	EGR1
6.49e-21	-1.56223	0.099	0.318	2.18e-16	TAM_4	CCL3L1
1.48e-56	-1.55325	0.077	0.508	4.96e-52	TAM_4	CXCR4
1.1e-59	-1.55175	0.274	0.705	3.68e-55	TAM_4	NFKBIA
3.78e-77	-1.54511	0.342	0.796	1.27e-72	TAM_4	GLUL
1.95e-45	-1.54257	0.046	0.398	6.54e-41	TAM_4	ATF3
7.19e-79	-1.54202	0.605	0.899	2.41e-74	TAM_4	CTSB
7.06e-27	-1.53743	0.049	0.288	2.37e-22	TAM_4	IL1B
1.97e-75	-1.51958	0.609	0.861	6.62e-71	TAM_4	HLA-DPA1
4.34e-15	-1.51571	0.161	0.347	1.45e-10	TAM_4	CCL2
3.29e-59	-1.49778	0.327	0.747	1.1e-54	TAM_4	JUN
2.47e-67	-1.48622	0.653	0.904	8.28e-63	TAM_4	CTSD
7.5e-46	-1.48121	0.168	0.556	2.52e-41	TAM_4	DNAJB1
1.9e-63	-1.44826	0.201	0.673	6.37e-59	TAM_4	JUNB
7.3e-55	-1.44485	0.073	0.494	2.45e-50	TAM_4	NAMPT
2.68e-40	-1.43333	0.035	0.354	9e-36	TAM_4	ZNF331
9.67e-41	-1.41685	0.276	0.663	3.24e-36	TAM_4	CTSL
1.02e-30	-1.4151	0.225	0.542	3.43e-26	TAM_4	CCL4
1.2e-68	-1.41055	0.916	0.951	4.02e-64	TAM_4	HLA-DRA
2e-80	-1.39463	0.43	0.869	6.7e-76	TAM_4	SRGN
2.68e-52	-1.38885	0.099	0.515	8.99e-48	TAM_4	GADD45B
3.03e-57	-1.37696	0.21	0.645	1.02e-52	TAM_4	LGALS3
7.09e-82	-1.3564	0.795	0.956	2.38e-77	TAM_4	MT-ND1
8.88e-92	-1.33989	0.506	0.911	2.98e-87	TAM_4	HLA-C
4.53e-71	-1.33776	0.391	0.826	1.52e-66	TAM_4	UBC
5.15e-47	-1.3345	0.022	0.376	1.73e-42	TAM_4	SERPING1
4.11e-16	-1.32826	0.113	0.297	1.38e-11	TAM_4	SELENOP
1.34e-46	-1.28325	0.029	0.382	4.49e-42	TAM_4	MTRNR2L12
2.49e-46	-1.26957	0.152	0.548	8.34e-42	TAM_4	ZFAND5
2.97e-59	-1.26278	0.347	0.743	9.97e-55	TAM_4	CTSS
2.8e-50	-1.24986	0.04	0.424	9.38e-46	TAM_4	TMEM176A
9.38e-37	-1.24179	0.04	0.344	3.15e-32	TAM_4	IL4I1
2.3e-32	-1.22573	0.227	0.561	7.7e-28	TAM_4	MT2A
4.6e-43	-1.21726	0.086	0.451	1.54e-38	TAM_4	TSC22D3
2.55e-50	-1.20975	0.11	0.529	8.56e-46	TAM_4	PNRC1
1.49e-70	-1.19156	0.77	0.924	4.98e-66	TAM_4	TPT1
8.27e-56	-1.1799	0.3	0.752	2.77e-51	TAM_4	CD68
8.81e-50	-1.17933	0.285	0.708	2.95e-45	TAM_4	BTG1
6.88e-38	-1.17566	0.062	0.386	2.31e-33	TAM_4	CEBPD
4.08e-41	-1.16853	0.137	0.512	1.37e-36	TAM_4	RHOB
2.89e-43	-1.15385	0.155	0.544	9.7e-39	TAM_4	PLD3
6.8e-24	-1.1503	0.049	0.274	2.28e-19	TAM_4	SLC40A1
3.02e-44	-1.14871	0.426	0.73	1.01e-39	TAM_4	HLA-DQB1
2.57e-37	-1.12714	0.331	0.673	8.61e-33	TAM_4	TXNIP
8.14e-27	-1.10866	0.923	0.924	2.73e-22	TAM_4	MT-ND3
2.27e-32	-1.10737	0.013	0.271	7.62e-28	TAM_4	NFKBIZ
3e-40	-1.10535	0.102	0.459	1.01e-35	TAM_4	PPP1R15A
8.63e-96	-1.10358	0.852	0.978	2.89e-91	TAM_4	HLA-B
3.64e-39	-1.09784	0.214	0.595	1.22e-34	TAM_4	CTSC
3.94e-36	-1.08523	0.064	0.38	1.32e-31	TAM_4	CHMP1B
9.02e-31	-1.08487	0.137	0.448	3.02e-26	TAM_4	ZFP36
4.85e-23	-1.08239	0.488	0.726	1.63e-18	TAM_4	HSPA1A
1.1e-43	-1.0798	0.113	0.497	3.7e-39	TAM_4	CEBPB
4.17e-39	-1.07307	0.205	0.58	1.4e-34	TAM_4	HERPUD1
1.77e-45	-1.05782	0.062	0.438	5.95e-41	TAM_4	CXCL16
3.88e-35	-1.05761	0.086	0.407	1.3e-30	TAM_4	RGS2
2.88e-33	-1.05404	0.013	0.278	9.66e-29	TAM_4	FUCA1
4.31e-31	-1.05076	0.161	0.478	1.44e-26	TAM_4	ACP5
1.82e-46	-1.0502	0.664	0.852	6.12e-42	TAM_4	HLA-DPB1
1.13e-40	-1.0497	0.512	0.791	3.79e-36	TAM_4	CTSZ
4.01e-36	-1.04892	0.201	0.567	1.34e-31	TAM_4	IER2
4.7e-39	-1.04278	0.252	0.644	1.58e-34	TAM_4	SGK1
1.34e-30	-1.03842	0.088	0.38	4.51e-26	TAM_4	GPR183
1.52e-30	-1.02957	0.272	0.599	5.09e-26	TAM_4	LGMN
2.24e-56	-1.02629	0.351	0.793	7.53e-52	TAM_4	HLA-E
3.52e-33	-1.02192	0.04	0.323	1.18e-28	TAM_4	KLF4
1.82e-37	-1.02108	0.057	0.376	6.1e-33	TAM_4	ALDH2
6.92e-41	-1.01509	0.62	0.876	2.32e-36	TAM_4	FOS
7.11e-19	-1.0008	0.077	0.276	2.39e-14	TAM_4	MGP
2.11e-27	-0.998974	0.026	0.263	7.09e-23	TAM_4	KLF2
1.14e-29	-0.998439	0.024	0.274	3.83e-25	TAM_4	BCL2A1
9.18e-38	-0.997972	0.141	0.509	3.08e-33	TAM_4	ANXA1
7.84e-42	-0.976174	0.155	0.551	2.63e-37	TAM_4	BRI3
2.93e-67	-0.966446	0.7	0.954	9.84e-63	TAM_4	MT-ND2
7.97e-34	-0.964655	0.717	0.864	2.67e-29	TAM_4	VIM
3.19e-35	-0.960192	0.018	0.3	1.07e-30	TAM_4	KCNMA1
2.18e-54	-0.958169	0.974	0.987	7.3e-50	TAM_4	MT-ND4
6.19e-46	-0.956422	0.263	0.709	2.08e-41	TAM_4	SDCBP
1.56e-34	-0.954893	0.642	0.798	5.23e-30	TAM_4	C1QB
1.83e-74	-0.947741	0.996	1	6.13e-70	TAM_4	FTH1
1.1e-32	-0.946664	0.371	0.722	3.7e-28	TAM_4	KLF6
6.56e-32	-0.942012	0.033	0.305	2.2e-27	TAM_4	C5AR1
2.81e-42	-0.937817	0.998	1	9.43e-38	TAM_4	FTL
2.79e-43	-0.932986	0.298	0.707	9.36e-39	TAM_4	ASAH1
3.16e-29	-0.932391	0.095	0.386	1.06e-24	TAM_4	HSPH1
1.8e-28	-0.931565	0.881	0.902	6.02e-24	TAM_4	APOE
3.38e-29	-0.928117	0.221	0.558	1.13e-24	TAM_4	MSR1
5.62e-26	-0.926387	0.033	0.263	1.88e-21	TAM_4	TFRC
1.91e-39	-0.923452	0.47	0.768	6.4e-35	TAM_4	MT-ND5
3.69e-64	-0.922226	0.996	0.999	1.24e-59	TAM_4	MT-CO1
1.31e-31	-0.922195	0.141	0.469	4.4e-27	TAM_4	LIPA
8e-37	-0.913512	0.219	0.594	2.68e-32	TAM_4	CTSH
7.47e-60	-0.903837	0.792	0.951	2.51e-55	TAM_4	HLA-A
3.61e-31	-0.896927	0.117	0.434	1.21e-26	TAM_4	SNX10
4.22e-34	-0.882602	0.104	0.436	1.42e-29	TAM_4	FGL2
6.98e-29	-0.881762	0.046	0.308	2.34e-24	TAM_4	CDKN1A
3.97e-26	-0.879149	0.066	0.319	1.33e-21	TAM_4	IRF1
1.09e-36	-0.878036	0.834	0.949	3.66e-32	TAM_4	NEAT1
6.84e-27	-0.877898	0.04	0.282	2.3e-22	TAM_4	SLC2A3
2e-32	-0.876171	0.042	0.326	6.72e-28	TAM_4	BASP1
5.82e-30	-0.865107	0.042	0.309	1.95e-25	TAM_4	C2
1.69e-25	-0.863834	0.453	0.744	5.68e-21	TAM_4	RGS1
2.26e-32	-0.862359	0.227	0.58	7.59e-28	TAM_4	HLA-DMB
2.57e-27	-0.858732	0.121	0.406	8.63e-23	TAM_4	PLTP
1.66e-44	-0.85304	0.497	0.851	5.56e-40	TAM_4	EIF1
5.84e-36	-0.849524	0.082	0.415	1.96e-31	TAM_4	RNF13
1.71e-09	-0.841796	0.219	0.377	5.73e-05	TAM_4	CCL4L2
1.1e-36	-0.833149	0.097	0.448	3.69e-32	TAM_4	LAMP1
5.72e-19	-0.832954	0.075	0.28	1.92e-14	TAM_4	GBP1
3.85e-29	-0.826095	0.194	0.516	1.29e-24	TAM_4	A2M
2.19e-30	-0.820359	0.247	0.596	7.33e-26	TAM_4	LITAF
3.22e-28	-0.817697	0.051	0.313	1.08e-23	TAM_4	CPM
4.48e-35	-0.813251	0.196	0.571	1.5e-30	TAM_4	RTN4
3.33e-36	-0.811514	0.077	0.41	1.12e-31	TAM_4	CNBP
2.62e-28	-0.807526	0.04	0.294	8.79e-24	TAM_4	ELL2
1.13e-25	-0.802075	0.157	0.45	3.8e-21	TAM_4	MS4A4A
5.4e-27	-0.800996	0.051	0.305	1.81e-22	TAM_4	NCF1
6.39e-26	-0.796475	0.046	0.289	2.14e-21	TAM_4	ICAM1
4.42e-29	-0.787383	0.166	0.49	1.48e-24	TAM_4	DNAJA1
3.94e-20	-0.782535	0.309	0.588	1.32e-15	TAM_4	C15orf48
5.97e-32	-0.778855	0.071	0.373	2e-27	TAM_4	NFE2L2
6e-28	-0.770213	0.057	0.321	2.01e-23	TAM_4	CPVL
2.22e-27	-0.76702	0.313	0.656	7.44e-23	TAM_4	MAFB
3.16e-33	-0.763164	0.077	0.392	1.06e-28	TAM_4	C3AR1
9.32e-23	-0.75395	0.74	0.83	3.13e-18	TAM_4	C1QA
2.03e-30	-0.750777	0.095	0.402	6.79e-26	TAM_4	FCGR1A
2.93e-32	-0.749835	0.062	0.361	9.82e-28	TAM_4	BNIP3L
1.6e-36	-0.748988	0.108	0.471	5.36e-32	TAM_4	CD37
1.06e-33	-0.741062	0.075	0.391	3.56e-29	TAM_4	CLEC2B
1.34e-36	-0.739781	0.609	0.878	4.51e-32	TAM_4	ITM2B
7.71e-30	-0.733072	0.126	0.445	2.59e-25	TAM_4	MT-ND4L
9.54e-19	-0.729898	0.06	0.255	3.2e-14	TAM_4	DDIT4
1.72e-28	-0.725978	0.053	0.318	5.78e-24	TAM_4	CD59
7.33e-24	-0.723597	0.183	0.479	2.46e-19	TAM_4	ATP1B3
1.76e-25	-0.72178	0.086	0.352	5.9e-21	TAM_4	ARL4C
5.34e-25	-0.714584	0.029	0.252	1.79e-20	TAM_4	RASGEF1B
6.97e-28	-0.710504	0.139	0.454	2.34e-23	TAM_4	LILRB4
3.67e-28	-0.708178	0.04	0.294	1.23e-23	TAM_4	NCF2
1.06e-27	-0.70697	0.049	0.307	3.56e-23	TAM_4	NPL
7.85e-24	-0.706028	0.137	0.414	2.63e-19	TAM_4	REL
7.55e-17	-0.704608	0.3	0.55	2.53e-12	TAM_4	HSPA1B
1.27e-27	-0.704268	0.124	0.426	4.27e-23	TAM_4	RASSF4
3.2e-27	-0.703285	0.124	0.424	1.07e-22	TAM_4	CCNL1
1.34e-20	-0.699203	0.232	0.515	4.49e-16	TAM_4	PLAUR
2.77e-26	-0.698151	0.051	0.3	9.28e-22	TAM_4	NABP1
4.72e-27	-0.68996	0.033	0.273	1.58e-22	TAM_4	HLA-DOA
1.28e-22	-0.687499	0.04	0.254	4.3e-18	TAM_4	HLA-DQA2
4.7e-21	-0.686194	0.057	0.271	1.58e-16	TAM_4	SCD
1.26e-27	-0.682384	0.113	0.413	4.22e-23	TAM_4	NINJ1
1.26e-25	-0.679182	0.212	0.537	4.22e-21	TAM_4	FCGR2A
1.35e-25	-0.670341	0.199	0.523	4.51e-21	TAM_4	VMP1
7.94e-27	-0.669413	0.084	0.361	2.66e-22	TAM_4	SERPINA1
4.18e-24	-0.668894	0.272	0.592	1.4e-19	TAM_4	XIST
3.01e-22	-0.666885	0.084	0.324	1.01e-17	TAM_4	IER5
2.06e-27	-0.666027	0.168	0.49	6.93e-23	TAM_4	TMEM59
1.27e-21	-0.663969	0.055	0.271	4.27e-17	TAM_4	LTA4H
7.08e-15	-0.657292	0.746	0.887	2.38e-10	TAM_4	HSP90AA1
3.89e-28	-0.656847	0.108	0.414	1.3e-23	TAM_4	MGAT1
8.85e-21	-0.649209	0.097	0.332	2.97e-16	TAM_4	BTG2
2.2e-27	-0.645485	0.194	0.533	7.39e-23	TAM_4	SQSTM1
5.33e-20	-0.639716	0.212	0.498	1.79e-15	TAM_4	HMOX1
4.97e-27	-0.639575	0.232	0.584	1.67e-22	TAM_4	PABPC1
6.28e-24	-0.637669	0.132	0.411	2.11e-19	TAM_4	AKR1B1
9.32e-25	-0.636167	0.095	0.359	3.13e-20	TAM_4	CD86
2.28e-28	-0.633875	0.177	0.527	7.66e-24	TAM_4	CCNI
1.3e-22	-0.623154	0.249	0.565	4.34e-18	TAM_4	MCL1
1.56e-25	-0.623076	0.102	0.376	5.24e-21	TAM_4	UCP2
4.58e-32	-0.622901	0.828	0.967	1.54e-27	TAM_4	SAT1
8.04e-29	-0.622168	0.128	0.444	2.7e-24	TAM_4	LAMP2
7.42e-28	-0.62149	0.141	0.46	2.49e-23	TAM_4	SARAF
8.39e-16	-0.615359	0.073	0.253	2.81e-11	TAM_4	SLC11A1
3.02e-28	-0.610491	0.102	0.401	1.01e-23	TAM_4	HEXA
2.98e-30	-0.609787	0.132	0.47	1e-25	TAM_4	SH3BGRL
3.61e-21	-0.603801	0.494	0.767	1.21e-16	TAM_4	TYMP
1.53e-26	-0.597721	0.124	0.421	5.13e-22	TAM_4	DNAJB6
1.51e-24	-0.596116	0.093	0.363	5.08e-20	TAM_4	GM2A
1.6e-21	-0.594034	0.196	0.479	5.38e-17	TAM_4	OLR1
1.03e-07	-0.589695	0.402	0.554	0.00346493	TAM_4	FN1
1.06e-23	-0.588226	0.066	0.309	3.55e-19	TAM_4	DRAM2
3.85e-25	-0.588214	0.969	0.976	1.29e-20	TAM_4	CD74
6.07e-20	-0.579568	0.254	0.542	2.04e-15	TAM_4	LDHA
5.32e-20	-0.578879	0.393	0.666	1.78e-15	TAM_4	ITGB2
2.2e-19	-0.566706	0.402	0.683	7.38e-15	TAM_4	CD81
5.26e-24	-0.565329	0.583	0.855	1.76e-19	TAM_4	GRN
1.48e-16	-0.563168	0.095	0.296	4.95e-12	TAM_4	PHACTR1
1.11e-25	-0.560511	0.077	0.347	3.72e-21	TAM_4	GNS
6e-14	-0.55757	0.104	0.286	2.01e-09	TAM_4	MAF
2.77e-07	-0.553524	0.786	0.847	0.00927687	TAM_4	APOC1
2.29e-20	-0.552722	0.404	0.712	7.68e-16	TAM_4	ZFP36L1
2.27e-22	-0.54911	0.06	0.29	7.6e-18	TAM_4	DSE
2.45e-21	-0.545361	0.075	0.303	8.22e-17	TAM_4	SLC3A2
1.53e-25	-0.543324	0.159	0.473	5.13e-21	TAM_4	ATP6AP2
6.29e-18	-0.543324	0.342	0.631	2.11e-13	TAM_4	HSPA8
1.27e-22	-0.543313	0.104	0.362	4.26e-18	TAM_4	TSPAN4
3.64e-20	-0.536346	0.068	0.286	1.22e-15	TAM_4	TUBB4B
1.64e-23	-0.534237	0.084	0.339	5.52e-19	TAM_4	SLC15A3
2.98e-15	-0.532543	0.102	0.295	9.99e-11	TAM_4	VAMP5
9.1e-24	-0.532093	0.099	0.367	3.05e-19	TAM_4	SERPINB1
5.65e-18	-0.528279	0.351	0.644	1.89e-13	TAM_4	MS4A7
8.42e-18	-0.526754	0.066	0.263	2.82e-13	TAM_4	FNIP2
6.54e-21	-0.526306	0.269	0.589	2.19e-16	TAM_4	FYB1
1.09e-13	-0.515429	0.179	0.389	3.65e-09	TAM_4	GCHFR
7.38e-21	-0.515093	0.046	0.255	2.48e-16	TAM_4	SOAT1
5.43e-22	-0.51441	0.192	0.492	1.82e-17	TAM_4	DDX3X
3.92e-19	-0.51349	0.252	0.543	1.32e-14	TAM_4	ZFP36L2
1.29e-22	-0.513489	0.071	0.309	4.33e-18	TAM_4	PRNP
3.83e-22	-0.51073	0.203	0.515	1.29e-17	TAM_4	KCTD12
2.42e-21	-0.506902	0.212	0.52	8.12e-17	TAM_4	WSB1
9.33e-18	-0.505627	0.071	0.27	3.13e-13	TAM_4	PMP22
4.19e-15	-0.502679	0.088	0.272	1.41e-10	TAM_4	PPA1
7e-19	-0.501811	0.084	0.302	2.35e-14	TAM_4	TNFAIP2
4.35e-38	0.506202	0.989	0.985	1.46e-33	TAM_4	RPL28
1.39e-13	0.507173	0.826	0.861	4.66e-09	TAM_4	AIF1
4.71e-34	0.511478	0.971	0.968	1.58e-29	TAM_4	RPL39
1.52e-37	0.514806	0.982	0.97	5.11e-33	TAM_4	RPS2
7.29e-19	0.517468	0.907	0.928	2.44e-14	TAM_4	RPS6
9.18e-20	0.521045	0.912	0.931	3.08e-15	TAM_4	FCER1G
3.17e-16	0.521608	0.737	0.769	1.06e-11	TAM_4	VAMP8
5.86e-29	0.536216	0.901	0.891	1.97e-24	TAM_4	RPL18
1.55e-35	0.536734	0.96	0.953	5.19e-31	TAM_4	RPL11
7.5e-16	0.549145	0.746	0.738	2.52e-11	TAM_4	RPSA
3.45e-28	0.557033	0.94	0.929	1.16e-23	TAM_4	RPL21
1.15e-36	0.569084	0.947	0.915	3.84e-32	TAM_4	UBA52
1.7e-15	0.575638	0.689	0.634	5.7e-11	TAM_4	IFITM3
4.57e-43	0.576625	0.993	0.964	1.53e-38	TAM_4	RPS28
6.77e-28	0.578965	0.905	0.899	2.27e-23	TAM_4	MYL6
2.58e-10	0.581428	0.605	0.65	8.66e-06	TAM_4	CHCHD2
2.59e-32	0.592956	0.925	0.918	8.69e-28	TAM_4	RPS9
4.96e-07	0.59865	0.536	0.597	0.0166212	TAM_4	AP2S1
7.57e-49	0.610887	0.976	0.959	2.54e-44	TAM_4	RPL19
2.39e-13	0.621795	0.669	0.702	8.01e-09	TAM_4	TSPO
1e-06	0.626711	0.494	0.521	0.0336699	TAM_4	LAMTOR4
3.56e-15	0.627415	0.634	0.588	1.19e-10	TAM_4	NOP10
3.53e-13	0.63002	0.598	0.613	1.19e-08	TAM_4	SSR4
1.12e-18	0.631382	0.77	0.782	3.75e-14	TAM_4	RPS21
7.73e-25	0.635405	0.79	0.8	2.59e-20	TAM_4	RPL24
1.02e-06	0.638551	0.256	0.185	0.0340527	TAM_4	PKIB
2.35e-39	0.64108	0.947	0.938	7.88e-35	TAM_4	RPS27A
7.07e-10	0.641335	0.581	0.617	2.37e-05	TAM_4	ATP5MD
4.31e-07	0.642342	0.508	0.534	0.0144576	TAM_4	COMMD6
3.44e-48	0.648796	0.993	0.977	1.15e-43	TAM_4	PTMA
5.7e-09	0.650196	0.55	0.594	0.000191191	TAM_4	UQCRH
9.66e-66	0.654494	1	0.992	3.24e-61	TAM_4	RPL41
7.53e-14	0.658769	0.673	0.721	2.52e-09	TAM_4	PSMA7
2.04e-42	0.662425	0.94	0.937	6.85e-38	TAM_4	FAU
3.4e-31	0.665668	0.916	0.935	1.14e-26	TAM_4	CYBA
2.71e-44	0.666507	0.951	0.949	9.09e-40	TAM_4	RPL15
8.09e-36	0.673089	0.905	0.884	2.71e-31	TAM_4	RPS11
1.59e-38	0.675904	0.916	0.9	5.32e-34	TAM_4	RPS3
3.5e-24	0.676881	0.748	0.616	1.17e-19	TAM_4	IFI6
8.77e-08	0.67692	0.444	0.418	0.00294032	TAM_4	TRMT112
1.95e-58	0.678313	0.991	0.97	6.53e-54	TAM_4	RPL13
9.23e-30	0.680064	0.839	0.801	3.09e-25	TAM_4	RPL10A
5.58e-42	0.689372	0.921	0.919	1.87e-37	TAM_4	RPL36
1.52e-20	0.694906	0.698	0.703	5.09e-16	TAM_4	COX6B1
1.72e-44	0.700871	0.943	0.941	5.77e-40	TAM_4	RPL8
2.57e-11	0.703122	0.576	0.586	8.6e-07	TAM_4	OST4
7.9e-08	0.704028	0.506	0.537	0.00265063	TAM_4	NEDD8
2.16e-55	0.704901	0.969	0.94	7.25e-51	TAM_4	RPS15A
1.99e-14	0.705291	0.521	0.407	6.68e-10	TAM_4	RPS17
1.6e-08	0.711541	0.543	0.572	0.00053495	TAM_4	PPIB
1.67e-50	0.714983	0.96	0.951	5.59e-46	TAM_4	ATP5F1E
6.29e-32	0.720764	0.815	0.825	2.11e-27	TAM_4	SRP14
1.55e-07	0.725109	0.45	0.447	0.00519485	TAM_4	NDUFA11
4.88e-29	0.728663	0.804	0.804	1.64e-24	TAM_4	COX4I1
2.03e-91	0.739832	1	0.993	6.81e-87	TAM_4	RPLP1
5.71e-08	0.739901	0.435	0.416	0.00191514	TAM_4	EIF2S2
2.41e-67	0.750369	0.985	0.964	8.07e-63	TAM_4	SERF2
2.94e-18	0.750712	0.647	0.653	9.85e-14	TAM_4	UBL5
2.45e-50	0.75581	0.925	0.874	8.21e-46	TAM_4	RPS20
1.99e-38	0.756855	0.837	0.827	6.69e-34	TAM_4	RPLP0
1.19e-06	0.763916	0.4	0.38	0.0398477	TAM_4	SF3B5
4.44e-07	0.765211	0.439	0.435	0.0148862	TAM_4	SNRPG
7.51e-14	0.76715	0.592	0.58	2.52e-09	TAM_4	BST2
1.49e-07	0.770044	0.477	0.475	0.00498843	TAM_4	TGFBI
7.32e-68	0.772126	0.98	0.962	2.46e-63	TAM_4	RPL32
1.89e-44	0.774734	0.905	0.906	6.32e-40	TAM_4	RPS13
9.36e-07	0.782511	0.446	0.454	0.0314051	TAM_4	COPS9
1.05e-64	0.783419	0.974	0.96	3.51e-60	TAM_4	RPL34
4.41e-60	0.791254	0.965	0.939	1.48e-55	TAM_4	RPS23
1.06e-26	0.793609	0.706	0.674	3.57e-22	TAM_4	ATP5MC2
4.15e-15	0.802265	0.596	0.602	1.39e-10	TAM_4	COX7B
2.21e-11	0.802576	0.344	0.237	7.42e-07	TAM_4	HTRA1
1.09e-06	0.804737	0.404	0.392	0.0367213	TAM_4	MRPS21
2.95e-08	0.808277	0.47	0.472	0.000991016	TAM_4	NDUFB11
6.53e-18	0.81483	0.585	0.557	2.19e-13	TAM_4	SEC61B
9.09e-75	0.815042	0.993	0.981	3.05e-70	TAM_4	RPS27
3.33e-14	0.815688	0.57	0.565	1.12e-09	TAM_4	ATP5MC3
1.41e-06	0.816647	0.362	0.328	0.0472913	TAM_4	SNRPE
1.1e-43	0.818582	0.936	0.89	3.68e-39	TAM_4	S100A6
4.39e-20	0.818687	0.627	0.583	1.47e-15	TAM_4	RPS10
1.27e-19	0.820855	0.664	0.693	4.25e-15	TAM_4	ELOB
5.95e-07	0.82127	0.256	0.189	0.0199396	TAM_4	NME1
5.33e-07	0.824897	0.386	0.36	0.01787	TAM_4	TRAPPC1
3.87e-07	0.832693	0.278	0.211	0.0129729	TAM_4	LTC4S
8.28e-09	0.833665	0.453	0.437	0.000277616	TAM_4	LAMTOR2
1.86e-18	0.834035	0.6	0.57	6.25e-14	TAM_4	LST1
1.37e-26	0.839318	0.687	0.671	4.6e-22	TAM_4	COX5B
4.86e-09	0.841688	0.426	0.392	0.000163017	TAM_4	NDUFA2
1.65e-09	0.841795	0.422	0.365	5.55e-05	TAM_4	COX17
3.81e-61	0.848783	0.96	0.929	1.28e-56	TAM_4	RPL18A
1.34e-10	0.855152	0.296	0.202	4.49e-06	TAM_4	POLR2F
7.87e-10	0.85935	0.459	0.438	2.64e-05	TAM_4	NDUFS6
1.56e-92	0.8595	0.991	0.983	5.24e-88	TAM_4	RPS19
7.29e-12	0.86035	0.355	0.254	2.45e-07	TAM_4	KRTCAP2
7.35e-49	0.869454	0.848	0.788	2.46e-44	TAM_4	RPL38
1.68e-09	0.872519	0.455	0.441	5.64e-05	TAM_4	NDUFC2
3.9e-15	0.873863	0.576	0.594	1.31e-10	TAM_4	ATP5PF
1.95e-62	0.881239	0.923	0.861	6.56e-58	TAM_4	RPS5
6.94e-58	0.886272	0.918	0.877	2.33e-53	TAM_4	RPS25
1.21e-09	0.890199	0.382	0.32	4.07e-05	TAM_4	LSM7
9.65e-95	0.896945	0.993	0.979	3.24e-90	TAM_4	RPS14
4.07e-11	0.898046	0.466	0.434	1.37e-06	TAM_4	MZT2B
8.5e-15	0.910582	0.492	0.43	2.85e-10	TAM_4	ANAPC11
1.5e-08	0.918633	0.305	0.233	0.000502962	TAM_4	MZT2A
8.67e-08	0.91864	0.327	0.265	0.00290638	TAM_4	DNPH1
2.97e-13	0.918938	0.464	0.403	9.96e-09	TAM_4	NDUFB8
6.36e-80	0.921333	0.978	0.951	2.13e-75	TAM_4	RPS8
6.25e-61	0.922084	0.901	0.801	2.1e-56	TAM_4	RPL23A
3.92e-76	0.925544	0.96	0.913	1.31e-71	TAM_4	RPS16
1.1e-28	0.93209	0.717	0.704	3.69e-24	TAM_4	HMGB1
6.04e-12	0.934796	0.269	0.17	2.03e-07	TAM_4	NDUFAF8
1.49e-10	0.938371	0.413	0.354	4.99e-06	TAM_4	ROMO1
3.83e-07	0.946095	0.358	0.322	0.0128322	TAM_4	PET100
6.35e-42	0.949293	0.784	0.727	2.13e-37	TAM_4	ATP5MG
2.81e-28	0.950372	0.662	0.607	9.42e-24	TAM_4	RBX1
4.54e-07	0.959778	0.322	0.269	0.015219	TAM_4	SDF2L1
1.32e-10	0.96143	0.371	0.299	4.41e-06	TAM_4	SNRPF
1.72e-13	0.963568	0.393	0.303	5.75e-09	TAM_4	SNRPD1
1.34e-88	0.976512	0.971	0.937	4.49e-84	TAM_4	RPL37A
9.41e-99	0.97863	0.989	0.968	3.16e-94	TAM_4	RPLP2
2.86e-13	0.980648	0.428	0.357	9.58e-09	TAM_4	NDUFA13
2.29e-12	0.983852	0.329	0.235	7.68e-08	TAM_4	PARP1
5.74e-47	0.985102	0.819	0.804	1.93e-42	TAM_4	COX7C
4.62e-52	0.985655	0.815	0.729	1.55e-47	TAM_4	COX6C
3.46e-19	0.987036	0.664	0.646	1.16e-14	TAM_4	EMP3
5.2e-44	0.987233	0.766	0.697	1.74e-39	TAM_4	UQCR11
4.92e-09	0.99416	0.336	0.271	0.000165033	TAM_4	EIF3J
2.26e-12	0.997534	0.395	0.319	7.59e-08	TAM_4	NAA38
2.9e-38	1.00195	0.717	0.623	9.74e-34	TAM_4	TMA7
9.7e-26	1.00267	0.614	0.541	3.25e-21	TAM_4	NDUFB1
6e-60	1.00462	0.868	0.788	2.01e-55	TAM_4	RPL27
3.37e-83	1.00934	0.976	0.925	1.13e-78	TAM_4	RPS29
3e-41	1.01809	0.748	0.694	1e-36	TAM_4	UQCR10
1.52e-28	1.0205	0.66	0.617	5.08e-24	TAM_4	ATP5MPL
1.12e-30	1.02088	0.704	0.689	3.75e-26	TAM_4	NDUFB2
2.9e-13	1.02413	0.344	0.243	9.73e-09	TAM_4	NHP2
1.22e-31	1.0284	0.66	0.585	4.11e-27	TAM_4	COX8A
1.06e-91	1.03416	0.987	0.95	3.55e-87	TAM_4	RPL13A
4.93e-124	1.04462	1	0.999	1.65e-119	TAM_4	TMSB4X
2.54e-15	1.05552	0.486	0.43	8.51e-11	TAM_4	MINOS1
1.79e-33	1.06345	0.673	0.592	6.01e-29	TAM_4	COX6A1
1.32e-26	1.06743	0.592	0.513	4.42e-22	TAM_4	NDUFA1
1.81e-10	1.06831	0.517	0.528	6.08e-06	TAM_4	H2AFZ
6e-29	1.06927	0.589	0.458	2.01e-24	TAM_4	RPL36A
2.26e-62	1.07179	0.832	0.769	7.57e-58	TAM_4	PPIA
8.29e-55	1.1033	0.786	0.687	2.78e-50	TAM_4	NDUFA4
8.05e-36	1.1146	0.631	0.468	2.7e-31	TAM_4	MIF
3.71e-102	1.11571	0.971	0.935	1.24e-97	TAM_4	RPL35
4.79e-16	1.12466	0.442	0.358	1.61e-11	TAM_4	ATP5MC1
1.55e-60	1.13364	0.806	0.692	5.21e-56	TAM_4	COX7A2
6.66e-28	1.14037	0.616	0.559	2.23e-23	TAM_4	ATP5MF
4.37e-34	1.14412	0.653	0.538	1.46e-29	TAM_4	SEC61G
1.78e-105	1.14591	0.987	0.94	5.98e-101	TAM_4	LGALS1
[truncated: 208 more rows]
