# Supplementary material for: Integrated Analysis of Single-Cell and Bulk RNA-Sequencing Reveals a Tissue-Resident Macrophage-Related Signature for Predicting Immunotherapy Response in Breast Cancer Patients
Source: Cancers (Basel). 2022 Nov 9;14(22):5506. doi: 10.3390/cancers14225506 (PMC9688720; doi:10.3390/cancers14225506)
Supplement: Supplementary file 1 [file cancers-14-05506-s001.zip › Table S3.xls]

## Sheet: differentially express genes 
Table S4. The list of differentially expressed genes (DEGs) between RTM and TAM
p_val	avg_log2FC	pct.1	pct.2	p_val_adj	y	threshold	label
HLA-DRB5	0	1.48198	0.927	0.283	0	Inf	HLA-DRB5
HLA-DQA1	0	1.70369	0.942	0.485	0	Inf	HLA-DQA1
TMEM176B	0	1.72851	0.842	0.188	0	Inf	TMEM176B
TMSB4X	0	-1.43956	0.999	1	0	Inf	TMSB4X
MTRNR2L8	0	2.2531	0.745	0.119	0	Inf	MTRNR2L8
LYZ	0	2.50477	0.941	0.487	0	Inf	LYZ
MT-ATP6	0	2.08017	0.998	0.91	0	Inf	MT-ATP6
MT-ND3	0	1.67233	0.991	0.878	0	Inf	MT-ND3
MT-ND4	0	1.28216	0.999	0.975	0	Inf	MT-ND4
MT-CYB	0	1.55403	0.996	0.905	0	Inf	MT-CYB
RPL13A	0	-1.73148	0.943	0.961	5.40487e-304	307.793	RPL13A
TPT1	1.75644e-301	1.29364	0.994	0.847	5.89073e-297	300.755	TPT1
MT-CO1	4.01345e-294	1.09139	0.999	0.998	1.34603e-289	293.396	MT-CO1
MT-CO3	1.51873e-285	1.15898	0.999	0.994	5.09351e-281	284.819	MT-CO3
RPS18	1.92961e-264	-1.51298	0.966	0.978	6.47154e-260	263.715	RPS18
FCGR3A	1.58219e-245	1.48294	0.834	0.313	5.30635e-241	244.801	FCGR3A
MT-ND5	3.05936e-245	1.10162	0.956	0.581	1.02605e-240	244.514	MT-ND5
SOD2	5.12577e-244	1.57306	0.837	0.327	1.71908e-239	243.29	SOD2
TMEM176A	3.87536e-242	1.32452	0.717	0.148	1.29972e-237	241.412	TMEM176A
RPL27A	4.53636e-242	-1.58178	0.914	0.942	1.5214e-237	241.343	RPL27A
RPL31	1.43783e-241	-1.87315	0.655	0.833	4.82221e-237	240.842	RPL31
CTSZ	4.56559e-233	1.22273	0.954	0.625	1.53121e-228	232.341	CTSZ
MT-ND1	6.39568e-228	1.22829	0.991	0.902	2.14498e-223	227.194	MT-ND1
HLA-DRA	5.15828e-225	1.15363	0.995	0.913	1.72998e-220	224.287	HLA-DRA
IFI6	4.11118e-218	-2.47124	0.486	0.731	1.37881e-213	217.386	IFI6
MTRNR2L12	1.0136e-210	1.30367	0.66	0.122	3.39941e-206	209.994	MTRNR2L12
HLA-DQB1	1.03874e-210	1.06697	0.935	0.531	3.48372e-206	209.983	HLA-DQB1
CTSS	2.32801e-203	1.05408	0.924	0.543	7.80769e-199	202.633	CTSS
CFD	6.24546e-203	1.26075	0.763	0.224	2.0946e-198	202.204	CFD
TXNIP	3.73297e-199	1.18429	0.901	0.451	1.25196e-194	198.428	TXNIP
HLA-DPA1	2.29793e-195	0.91085	0.983	0.729	7.70681e-191	194.639	HLA-DPA1
RPL23A	4.77365e-191	-1.57191	0.749	0.856	1.60099e-186	190.321	RPL23A
ITGB2	2.97703e-178	0.911586	0.896	0.455	9.98435e-174	177.526	ITGB2
RPS17	4.13823e-174	-1.69196	0.22	0.559	1.38788e-169	173.383	RPS17
CXCL9	1.32283e-168	3.17396	0.453	0.019	4.4365e-164	167.878	CXCL9
SERPING1	1.59145e-168	1.09319	0.634	0.13	5.33741e-164	167.798	SERPING1
RPS19	2.93135e-166	-1.00328	0.985	0.983	9.83117e-162	165.533	RPS19
CTSB	4.19402e-162	1.08344	0.974	0.792	1.40659e-157	161.377	CTSB
C2	5.188e-162	1.13403	0.556	0.087	1.73995e-157	161.285	C2
MT-ND4L	5.68034e-158	0.931172	0.703	0.206	1.90507e-153	157.246	MT-ND4L
XIST	1.83185e-157	0.87521	0.833	0.364	6.14366e-153	156.737	XIST
RPS15	3.46943e-155	-1.05789	0.98	0.979	1.16358e-150	154.46	RPS15
GLUL	3.85529e-153	0.927354	0.93	0.618	1.29299e-148	152.414	GLUL
MRC1	1.95695e-152	1.39484	0.461	0.042	6.56321e-148	151.708	MRC1
C1QA	3.22987e-151	1.021	0.947	0.732	1.08324e-146	150.491	C1QA
ISG15	5.71538e-150	-2.83683	0.446	0.618	1.91683e-145	149.243	ISG15
VIM	9.85195e-149	1.07518	0.952	0.775	3.30415e-144	148.006	VIM
C1QB	2.02981e-147	0.930773	0.935	0.674	6.80759e-143	146.693	C1QB
HLA-DPB1	2.73162e-147	0.771713	0.972	0.733	9.16132e-143	146.564	HLA-DPB1
KCNMA1	8.16479e-141	1.01784	0.523	0.091	2.73831e-136	140.088	KCNMA1
PFN1	5.00994e-138	-1.30482	0.869	0.907	1.68023e-133	137.3	PFN1
FGL2	2.03909e-137	0.947715	0.676	0.206	6.83872e-133	136.691	FGL2
RPLP1	1.25321e-135	-0.77945	0.994	0.994	4.20302e-131	134.902	RPLP1
ALDH2	7.56211e-134	0.971475	0.59	0.167	2.53618e-129	133.121	ALDH2
A2M	4.30773e-133	0.982325	0.745	0.296	1.44473e-128	132.366	A2M
ATP1B3	7.56843e-130	1.00465	0.708	0.264	2.5383e-125	129.121	ATP1B3
NAMPT	9.6793e-124	0.937582	0.703	0.27	3.24624e-119	123.014	NAMPT
HSPA5	2.2326e-122	0.940039	0.65	0.209	7.48768e-118	121.651	HSPA5
RPS20	1.58201e-120	-1.22784	0.874	0.884	5.30574e-116	119.801	RPS20
RPS29	1.86722e-120	-1.07658	0.933	0.928	6.26229e-116	119.729	RPS29
SLAMF8	8.15426e-119	0.855748	0.447	0.065	2.73478e-114	118.089	SLAMF8
UBC	1.49796e-117	0.706848	0.941	0.664	5.02387e-113	116.824	UBC
CD81	1.59243e-117	0.717333	0.873	0.498	5.3407e-113	116.798	CD81
HLA-DMB	2.28362e-116	0.709716	0.791	0.368	7.65881e-112	115.641	HLA-DMB
CTSC	5.18322e-112	0.823562	0.788	0.39	1.73835e-107	111.285	CTSC
C3AR1	2.38606e-111	0.766487	0.614	0.178	8.00237e-107	110.622	C3AR1
PLTP	2.46349e-110	0.943113	0.62	0.204	8.26205e-106	109.608	PLTP
AHNAK	1.37435e-109	0.728492	0.688	0.25	4.60929e-105	108.862	AHNAK
HLA-DOA	6.57785e-109	0.844328	0.47	0.091	2.20608e-104	108.182	HLA-DOA
FCGR2A	2.15113e-108	0.832049	0.745	0.331	7.21446e-104	107.667	FCGR2A
IGKC	9.05799e-108	3.9481	0.625	0.162	3.03787e-103	107.043	IGKC
ANXA1	1.86744e-107	0.799157	0.723	0.292	6.26302e-103	106.729	ANXA1
LGALS3	3.265e-107	0.642422	0.828	0.437	1.09502e-102	106.486	LGALS3
HLA-B	1.89868e-106	0.522561	0.996	0.941	6.36778e-102	105.722	HLA-B
LGALS1	2.31695e-106	-1.24814	0.939	0.949	7.77058e-102	105.635	LGALS1
GNAI2	2.72751e-106	0.59205	0.815	0.412	9.14753e-102	105.564	GNAI2
MIF	1.92974e-105	-1.51974	0.387	0.554	6.47195e-101	104.715	MIF
MGP	9.04827e-105	-1.72398	0.115	0.352	3.03461e-100	104.043	MGP
FYB1	1.60137e-103	0.665671	0.788	0.391	5.37066e-99	102.796	FYB1
TFRC	2.13854e-103	1.08075	0.449	0.091	7.17223e-99	102.67	TFRC
CKLF	3.44211e-103	-1.58525	0.425	0.569	1.15442e-98	102.463	CKLF
IFITM3	4.25342e-103	-1.89463	0.582	0.681	1.42651e-98	102.371	IFITM3
SLCO2B1	8.33233e-103	0.829198	0.651	0.232	2.7945e-98	102.079	SLCO2B1
RPL41	2.13628e-102	-0.72039	0.994	0.993	7.16465e-98	101.67	RPL41
BRI3	9.01393e-102	0.687454	0.751	0.337	3.02309e-97	101.045	BRI3
NR4A2	1.03481e-101	0.987268	0.684	0.302	3.47056e-97	100.985	NR4A2
GPNMB	1.97797e-101	0.737724	0.841	0.489	6.63371e-97	100.704	GPNMB
COX6C	3.51633e-101	-1.35033	0.709	0.758	1.17931e-96	100.454	COX6C
LITAF	9.2393e-101	0.670949	0.794	0.393	3.09868e-96	100.034	LITAF
HLA-E	1.22272e-99	0.491149	0.933	0.613	4.10074e-95	98.9127	HLA-E
CYBB	3.48225e-99	0.699184	0.762	0.362	1.16788e-94	98.4581	CYBB
ATP6AP2	7.20726e-99	0.634375	0.685	0.267	2.41717e-94	98.1422	ATP6AP2
PTPRC	7.66905e-99	0.666558	0.727	0.303	2.57205e-94	98.1153	PTPRC
ZFAND5	1.03521e-98	0.824209	0.743	0.339	3.4719e-94	97.985	ZFAND5
SNX6	1.01608e-97	0.671064	0.654	0.224	3.40774e-93	96.9931	SNX6
RASSF4	1.01718e-97	0.763285	0.629	0.228	3.41142e-93	96.9926	RASSF4
LY6E	5.07007e-97	-1.78138	0.484	0.584	1.7004e-92	96.295	LY6E
FOSB	1.578e-95	0.871621	0.765	0.39	5.2923e-91	94.8019	FOSB
ALDH1A1	2.04664e-95	0.80871	0.385	0.061	6.86402e-91	94.689	ALDH1A1
CTSH	5.11018e-95	0.68661	0.778	0.396	1.71385e-90	94.2916	CTSH
RBPJ	7.31602e-95	0.747464	0.582	0.178	2.45365e-90	94.1357	RBPJ
NEAT1	1.44217e-94	0.809116	0.979	0.906	4.83675e-90	93.841	NEAT1
RTN4	2.25973e-94	0.583223	0.776	0.359	7.57868e-90	93.6459	RTN4
IL32	6.42511e-92	1.00314	0.327	0.038	2.15485e-87	91.1921	IL32
CPVL	1.85384e-91	0.742622	0.51	0.14	6.21742e-87	90.7319	CPVL
PNRC1	1.97948e-91	0.597847	0.73	0.311	6.63877e-87	90.7034	PNRC1
RPS14	6.73319e-91	-0.811859	0.984	0.978	2.25818e-86	90.1718	RPS14
CLEC2B	1.01369e-90	0.724589	0.598	0.188	3.39973e-86	89.9941	CLEC2B
RPLP2	1.18572e-88	-0.887448	0.984	0.961	3.97665e-84	87.926	RPLP2
CD74	2.32971e-88	0.511331	0.998	0.96	7.81338e-84	87.6327	CD74
LDHA	4.78154e-87	0.748373	0.73	0.358	1.60363e-82	86.3204	LDHA
PLXDC2	9.80025e-87	0.587542	0.655	0.247	3.28681e-82	86.0088	PLXDC2
NOP10	2.37067e-86	-1.39085	0.537	0.632	7.95074e-82	85.6251	NOP10
RNF13	4.97986e-86	0.573975	0.607	0.219	1.67014e-81	85.3028	RNF13
MT-ND2	5.34144e-86	0.525731	0.988	0.882	1.79141e-81	85.2723	MT-ND2
CD44	2.04134e-85	0.61	0.76	0.365	6.84624e-81	84.6901	CD44
IFITM1	2.29673e-85	-2.04106	0.02	0.22	7.70278e-81	84.6389	IFITM1
HSP90AA1	1.37351e-84	0.768986	0.964	0.807	4.60647e-80	83.8622	HSP90AA1
GAA	1.41789e-84	0.6822	0.511	0.146	4.75533e-80	83.8484	GAA
LCP1	2.82811e-83	0.59567	0.628	0.227	9.48491e-79	82.5485	LCP1
PLEKHO1	3.18072e-83	0.6416	0.571	0.181	1.06675e-78	82.4975	PLEKHO1
KLF2	6.52181e-83	0.958378	0.432	0.101	2.18728e-78	82.1856	KLF2
CCL5	1.26145e-82	1.06947	0.399	0.089	4.23064e-78	81.8991	CCL5
HLA-DRB1	4.70059e-82	0.496756	0.98	0.869	1.57648e-77	81.3278	HLA-DRB1
SERPINA1	8.40844e-82	0.701163	0.555	0.174	2.82002e-77	81.0753	SERPINA1
SLC2A3	1.41453e-81	0.889881	0.453	0.118	4.74405e-77	80.8494	SLC2A3
HERPUD1	2.27238e-81	0.638303	0.764	0.382	7.62112e-77	80.6435	HERPUD1
CNBP	3.14559e-81	0.55215	0.601	0.215	1.05497e-76	80.5023	CNBP
HSPA8	5.55433e-81	0.543989	0.81	0.453	1.86281e-76	80.2554	HSPA8
LHFPL2	2.43981e-79	0.636051	0.542	0.169	8.18262e-75	78.6126	LHFPL2
BTG1	2.84805e-78	0.586398	0.859	0.524	9.55181e-74	77.5455	BTG1
LAP3	2.01112e-77	0.574927	0.61	0.24	6.74489e-73	76.6966	LAP3
IGHG3	2.96307e-77	2.7974	0.314	0.018	9.93753e-73	76.5283	IGHG3
IQGAP1	6.42833e-77	0.519216	0.66	0.254	2.15593e-72	76.1919	IQGAP1
PRDX1	3.27994e-76	0.661611	0.918	0.72	1.10003e-71	75.4841	PRDX1
KCTD12	9.46674e-76	0.615373	0.711	0.32	3.17496e-71	75.0238	KCTD12
FCGBP	9.52023e-76	-1.74293	0.031	0.22	3.1929e-71	75.0214	FCGBP
ZNF331	1.44756e-75	0.911255	0.519	0.18	4.85481e-71	74.8394	ZNF331
HLA-A	6.10229e-75	0.41049	0.986	0.896	2.04659e-70	74.2145	HLA-A
TNFAIP3	7.18019e-75	0.810621	0.611	0.249	2.40809e-70	74.1439	TNFAIP3
LILRB4	1.65602e-74	0.584171	0.64	0.265	5.55396e-70	73.7809	LILRB4
CPM	1.72353e-74	0.694927	0.486	0.143	5.78039e-70	73.7636	CPM
CTSD	2.41368e-74	0.692448	0.962	0.817	8.09502e-70	73.6173	CTSD
GOLGA4	3.11872e-74	0.610832	0.421	0.098	1.04596e-69	73.506	GOLGA4
VMP1	7.60374e-74	0.66049	0.705	0.336	2.55014e-69	73.119	VMP1
IRF1	1.21239e-73	0.779914	0.495	0.149	4.06611e-69	72.9164	IRF1
NFE2L2	4.05338e-73	0.605708	0.556	0.189	1.35942e-68	72.3922	NFE2L2
RANBP2	7.71091e-73	0.896733	0.423	0.098	2.58609e-68	72.1129	RANBP2
SNX2	8.87551e-73	0.515475	0.528	0.166	2.97667e-68	72.0518	SNX2
SRGN	2.45792e-72	0.420858	0.958	0.725	8.24337e-68	71.6094	SRGN
TSC22D3	2.58541e-72	0.755672	0.63	0.259	8.67095e-68	71.5875	TSC22D3
RPS27	3.16175e-72	-0.727791	0.987	0.979	1.06039e-67	71.5001	RPS27
ACTR2	4.49255e-72	0.40769	0.753	0.369	1.50671e-67	71.3475	ACTR2
RPL10	5.2805e-72	-0.636763	0.995	0.99	1.77098e-67	71.2773	RPL10
PABPC1	6.98293e-72	0.480615	0.77	0.389	2.34194e-67	71.156	PABPC1
UQCRB	1.53814e-71	0.415096	0.812	0.445	5.15863e-67	70.813	UQCRB
PPT1	2.63725e-71	0.47193	0.704	0.316	8.84481e-67	70.5788	PPT1
C5AR1	4.86641e-71	0.722452	0.474	0.137	1.6321e-66	70.3128	C5AR1
PRNP	5.71612e-71	0.612861	0.49	0.138	1.91707e-66	70.2429	PRNP
TAPBP	1.27581e-69	0.446067	0.614	0.238	4.27882e-65	68.8942	TAPBP
ANKRD12	1.67966e-69	0.561441	0.47	0.144	5.63324e-65	68.7748	ANKRD12
SNX10	2.42961e-69	0.630764	0.613	0.25	8.14842e-65	68.6145	SNX10
ITM2B	4.13992e-69	0.416238	0.964	0.769	1.38844e-64	68.383	ITM2B
IQGAP2	3.6687e-68	0.610494	0.409	0.098	1.23041e-63	67.4355	IQGAP2
HSPD1	9.33659e-68	0.698966	0.559	0.202	3.13131e-63	67.0298	HSPD1
UGP2	2.13012e-67	0.612701	0.452	0.122	7.14399e-63	66.6716	UGP2
TYROBP	8.1224e-67	-0.749361	0.988	0.968	2.72409e-62	66.0903	TYROBP
ZEB2	8.1466e-67	0.431707	0.699	0.325	2.73221e-62	66.089	ZEB2
RPL38	8.2341e-67	-1.04891	0.802	0.789	2.76155e-62	66.0844	RPL38
MT-CO2	2.17905e-66	0.434513	0.999	0.998	7.30811e-62	65.6617	MT-CO2
GNPTAB	2.38757e-66	0.569968	0.384	0.082	8.00742e-62	65.622	GNPTAB
UBE2D3	4.61824e-66	0.402423	0.737	0.354	1.54886e-61	65.3355	UBE2D3
HCLS1	5.55399e-66	0.475293	0.591	0.229	1.8627e-61	65.2554	HCLS1
ASAH1	1.22232e-65	0.414273	0.848	0.532	4.0994e-61	64.9128	ASAH1
RPL27	1.22386e-65	-1.10122	0.804	0.792	4.10457e-61	64.9123	RPL27
FBP1	1.56475e-65	1.20287	0.359	0.088	5.24785e-61	64.8056	FBP1
PDIA3	1.61264e-65	0.499635	0.612	0.249	5.40848e-61	64.7925	PDIA3
BASP1	1.79547e-65	0.679367	0.49	0.159	6.02166e-61	64.7458	BASP1
PGK1	3.07262e-65	0.485881	0.727	0.36	1.0305e-60	64.5125	PGK1
ARPC5	4.37667e-65	0.317313	0.815	0.447	1.46785e-60	64.3589	ARPC5
CIITA	6.89964e-65	0.593056	0.364	0.078	2.314e-60	64.1612	CIITA
CAST	7.96773e-65	0.458902	0.593	0.223	2.67222e-60	64.0987	CAST
GBP5	1.10029e-64	0.682642	0.25	0.021	3.69016e-60	63.9585	GBP5
CXCL16	1.12375e-64	0.473888	0.619	0.242	3.76884e-60	63.9493	CXCL16
FAM129A	1.17538e-64	0.695249	0.32	0.059	3.94199e-60	63.9298	FAM129A
RAP1B	1.43077e-64	0.494587	0.59	0.214	4.7985e-60	63.8444	RAP1B
SH3BGRL	1.91143e-64	0.419443	0.656	0.277	6.41057e-60	63.7186	SH3BGRL
RPL32	5.04134e-64	-0.793185	0.975	0.956	1.69076e-59	63.2975	RPL32
COX6A1	6.75637e-64	-1.19657	0.571	0.622	2.26595e-59	63.1703	COX6A1
DUSP1	1.0492e-63	0.568807	0.894	0.645	3.5188e-59	62.9791	DUSP1
MAP3K2	1.19133e-63	0.589956	0.505	0.169	3.99549e-59	62.924	MAP3K2
KIF5B	1.19408e-63	0.499121	0.494	0.153	4.00472e-59	62.923	KIF5B
BNIP3L	1.24975e-63	0.544676	0.528	0.188	4.1914e-59	62.9032	BNIP3L
ARL6IP5	2.12302e-63	0.411507	0.691	0.323	7.12019e-59	62.673	ARL6IP5
CD83	3.88165e-63	0.684072	0.648	0.306	1.30183e-58	62.411	CD83
ANXA5	4.19056e-63	0.382589	0.804	0.445	1.40543e-58	62.3777	ANXA5
MCL1	5.4341e-63	0.50264	0.745	0.38	1.82249e-58	62.2649	MCL1
PLBD1	1.10853e-62	0.540844	0.369	0.085	3.71779e-58	61.9553	PLBD1
CAPZB	7.36361e-62	0.427488	0.734	0.365	2.46961e-57	61.1329	CAPZB
MARCO	7.71118e-62	1.26768	0.234	0.032	2.58618e-57	61.1129	MARCO
SLC40A1	1.06619e-61	1.02795	0.414	0.134	3.57577e-57	60.9722	SLC40A1
NCOA4	1.08018e-61	0.487782	0.523	0.186	3.62271e-57	60.9665	NCOA4
SPRED1	1.17337e-61	0.631621	0.454	0.129	3.93524e-57	60.9306	SPRED1
LAMP1	1.22229e-61	0.446573	0.624	0.26	4.09933e-57	60.9128	LAMP1
BCAT1	1.86298e-61	0.626699	0.403	0.097	6.24806e-57	60.7298	BCAT1
DOK2	2.27811e-61	0.542676	0.369	0.076	7.64034e-57	60.6424	DOK2
AKR1B1	3.21497e-61	0.521122	0.581	0.24	1.07824e-56	60.4928	AKR1B1
HSPH1	3.33976e-61	0.675592	0.56	0.211	1.12009e-56	60.4763	HSPH1
HNRNPU	3.57535e-61	0.62972	0.739	0.4	1.1991e-56	60.4467	HNRNPU
SIGLEC10	2.63076e-60	0.547477	0.275	0.04	8.82306e-56	59.5799	SIGLEC10
ADGRE5	3.95964e-60	0.569962	0.355	0.071	1.32798e-55	59.4023	ADGRE5
ATP5MC2	5.17613e-60	-1.06081	0.657	0.691	1.73597e-55	59.286	ATP5MC2
GOLGB1	6.67047e-60	0.564992	0.351	0.08	2.23714e-55	59.1758	GOLGB1
HSP90B1	6.86737e-60	0.437352	0.74	0.394	2.30318e-55	59.1632	HSP90B1
ICAM1	1.62609e-59	0.689255	0.447	0.133	5.45358e-55	58.7889	ICAM1
DDX3X	2.28384e-59	0.474912	0.677	0.307	7.65953e-55	58.6413	DDX3X
NCF1	2.58422e-59	0.560862	0.471	0.141	8.66697e-55	58.5877	NCF1
GNS	2.58427e-59	0.43432	0.519	0.178	8.66714e-55	58.5877	GNS
RPS2	2.66368e-59	-0.824546	0.985	0.962	8.93346e-55	58.5745	RPS2
HLA-DQA2	5.29332e-59	0.68411	0.396	0.115	1.77527e-54	58.2763	HLA-DQA2
ROCK1	6.43591e-59	0.483162	0.426	0.116	2.15847e-54	58.1914	ROCK1
RPL35	6.48794e-59	-0.821666	0.955	0.928	2.17592e-54	58.1879	RPL35
VOPP1	7.46008e-59	0.480112	0.486	0.163	2.50196e-54	58.1273	VOPP1
RPL17	1.73065e-58	-1.00593	0.132	0.291	5.80426e-54	57.7618	RPL17
ATF3	2.28626e-58	0.712553	0.549	0.228	7.66765e-54	57.6409	ATF3
TAGLN2	6.45697e-58	0.386377	0.674	0.315	2.16554e-53	57.19	TAGLN2
PARP14	9.00793e-58	0.461575	0.56	0.198	3.02108e-53	57.0454	PARP14
ACTG1	2.64892e-57	0.402235	0.949	0.791	8.88395e-53	56.5769	ACTG1
CPB1	3.28364e-57	-1.09295	0.001	0.128	1.10127e-52	56.4836	CPB1
ALOX5	3.65403e-57	0.506086	0.43	0.121	1.22549e-52	56.4372	ALOX5
KRTCAP2	1.20637e-56	-1.10592	0.197	0.312	4.04592e-52	55.9185	KRTCAP2
ACP5	3.46804e-56	0.600024	0.63	0.314	1.16311e-51	55.4599	ACP5
FUCA1	3.77894e-56	0.583376	0.432	0.122	1.26738e-51	55.4226	FUCA1
MFSD1	3.89468e-56	0.362911	0.691	0.321	1.3062e-51	55.4095	MFSD1
TFEC	3.89532e-56	0.452512	0.412	0.116	1.30641e-51	55.4095	TFEC
STAT1	5.66241e-56	0.432776	0.716	0.374	1.89906e-51	55.247	STAT1
HLA-C	8.70704e-56	0.153985	0.976	0.791	2.92017e-51	55.0601	HLA-C
IGFBP5	9.63129e-56	-1.25437	0.041	0.167	3.23014e-51	55.0163	IGFBP5
SELENOP	1.36265e-55	1.4469	0.425	0.174	4.57005e-51	54.8656	SELENOP
IGHG1	2.03247e-55	2.68494	0.278	0.033	6.8165e-51	54.692	IGHG1
PMP22	2.70414e-55	0.605792	0.416	0.131	9.06915e-51	54.568	PMP22
MT-ATP8	2.99329e-55	0.503216	0.316	0.063	1.00389e-50	54.5239	MT-ATP8
SERINC1	3.31634e-55	0.462087	0.446	0.138	1.11223e-50	54.4793	SERINC1
TSPAN4	5.04891e-55	0.449384	0.533	0.195	1.6933e-50	54.2968	TSPAN4
DMXL2	1.09318e-54	0.466291	0.377	0.095	3.66631e-50	53.9613	DMXL2
SERPINB1	1.11847e-54	0.438865	0.53	0.204	3.75113e-50	53.9514	SERPINB1
RRAS	1.39023e-54	0.429385	0.292	0.048	4.66254e-50	53.8569	RRAS
DICER1	2.07589e-54	0.470193	0.373	0.095	6.96213e-50	53.6828	DICER1
PLD3	2.90442e-54	0.392097	0.708	0.357	9.74085e-50	53.5369	PLD3
NCF2	3.69092e-54	0.462485	0.443	0.142	1.23786e-49	53.4329	NCF2
RPS5	5.22471e-54	-0.929274	0.886	0.854	1.75226e-49	53.2819	RPS5
NABP1	1.56144e-53	0.539163	0.449	0.149	5.23675e-49	52.8065	NABP1
GBP1	2.42226e-53	0.894533	0.425	0.141	8.12377e-49	52.6158	GBP1
SERPINB6	2.45761e-53	0.374837	0.523	0.191	8.24232e-49	52.6095	SERPINB6
AKR1A1	2.53332e-53	0.37615	0.653	0.323	8.49623e-49	52.5963	AKR1A1
PLIN2	2.54419e-53	0.950977	0.588	0.271	8.53272e-49	52.5944	PLIN2
LAIR1	4.58514e-53	0.37826	0.62	0.262	1.53776e-48	52.3386	LAIR1
IER3	9.84164e-53	0.692924	0.674	0.387	3.30069e-48	52.0069	IER3
DNAJA1	1.66513e-52	0.376072	0.668	0.306	5.58453e-48	51.7786	DNAJA1
SLC15A3	1.85634e-52	0.459509	0.507	0.174	6.2258e-48	51.7313	SLC15A3
GNAS	2.27605e-52	0.354958	0.718	0.346	7.63343e-48	51.6428	GNAS
DST	2.72559e-52	0.527482	0.363	0.098	9.14109e-48	51.5645	DST
WASHC4	2.73497e-52	0.444678	0.392	0.111	9.17256e-48	51.563	WASHC4
CCL13	2.81226e-52	0.915842	0.178	0.008	9.43175e-48	51.5509	CCL13
CSDE1	3.8808e-52	0.369831	0.533	0.202	1.30154e-47	51.4111	CSDE1
IL4I1	8.07998e-52	0.609315	0.498	0.179	2.70986e-47	51.0926	IL4I1
VPS13C	9.12476e-52	0.491432	0.383	0.099	3.06026e-47	51.0398	VPS13C
ALCAM	9.85495e-52	0.428216	0.466	0.151	3.30515e-47	51.0063	ALCAM
FN1	9.97667e-52	0.8059	0.692	0.43	3.34598e-47	51.001	FN1
GPR155	2.09824e-51	0.519825	0.256	0.048	7.03708e-47	50.6781	GPR155
FCGRT	3.01202e-51	0.349884	0.838	0.535	1.01017e-46	50.5211	FCGRT
LAMP2	5.38344e-51	0.336697	0.62	0.262	1.8055e-46	50.2689	LAMP2
CXCR4	6.08676e-51	0.447565	0.668	0.316	2.04138e-46	50.2156	CXCR4
IL13RA1	6.84596e-51	0.452758	0.386	0.114	2.296e-46	50.1646	IL13RA1
GM2A	7.01383e-51	0.414578	0.534	0.194	2.3523e-46	50.154	GM2A
FKBP5	7.20983e-51	0.503974	0.329	0.087	2.41803e-46	50.1421	FKBP5
ARHGAP18	8.6317e-51	0.420807	0.574	0.226	2.8949e-46	50.0639	ARHGAP18
MS4A4A	9.59283e-51	0.42224	0.62	0.277	3.21724e-46	50.0181	MS4A4A
DSE	2.11852e-50	0.468666	0.444	0.139	7.1051e-46	49.674	DSE
GDI2	3.48022e-50	0.362342	0.54	0.206	1.1672e-45	49.4584	GDI2
CEBPD	4.66482e-50	0.609699	0.533	0.223	1.56449e-45	49.3312	CEBPD
CHMP1B	5.01102e-50	0.552028	0.527	0.218	1.6806e-45	49.3001	CHMP1B
DAB2	6.17236e-50	0.426501	0.75	0.409	2.07009e-45	49.2095	DAB2
ME1	1.01735e-49	0.477987	0.216	0.025	3.412e-45	48.9925	ME1
HLA-DQB2	1.15448e-49	0.553835	0.247	0.04	3.87189e-45	48.9376	HLA-DQB2
LIMS1	1.39804e-49	0.352018	0.693	0.359	4.68875e-45	48.8545	LIMS1
KLF4	1.68189e-49	0.471799	0.477	0.163	5.64071e-45	48.7742	KLF4
ADA2	2.11789e-49	0.427697	0.533	0.193	7.10299e-45	48.6741	ADA2
STAB1	4.5516e-49	0.640767	0.456	0.172	1.52652e-44	48.3418	STAB1
RPS25	6.15175e-49	-0.940526	0.912	0.86	2.06317e-44	48.211	RPS25
ACP2	8.23373e-49	0.380601	0.433	0.136	2.76143e-44	48.0844	ACP2
SLC2A5	9.29164e-49	0.461352	0.225	0.032	3.11623e-44	48.0319	SLC2A5
SLC25A3	1.15768e-48	0.36668	0.678	0.337	3.88261e-44	47.9364	SLC25A3
ACSL1	1.36574e-48	0.508081	0.386	0.111	4.58042e-44	47.8646	ACSL1
REL	1.50039e-48	0.545629	0.569	0.254	5.032e-44	47.8238	REL
LRRFIP1	1.55088e-48	0.353512	0.71	0.36	5.20133e-44	47.8094	LRRFIP1
TMA7	2.95026e-48	-1.06894	0.629	0.636	9.89458e-44	47.5301	TMA7
GPX3	2.99182e-48	0.514695	0.278	0.061	1.0034e-43	47.5241	GPX3
GNB1	3.1176e-48	0.358071	0.502	0.18	1.04558e-43	47.5062	GNB1
FOLR2	4.61088e-48	0.797766	0.325	0.082	1.5464e-43	47.3362	FOLR2
RHOQ	4.89893e-48	0.466497	0.373	0.101	1.643e-43	47.3099	RHOQ
RPL15	6.99626e-48	-0.739255	0.966	0.938	2.3464e-43	47.1551	RPL15
FMNL2	1.1506e-47	0.392031	0.424	0.134	3.85887e-43	46.9391	FMNL2
WARS	1.16031e-47	0.522769	0.3	0.068	3.89146e-43	46.9354	WARS
LMNA	1.27646e-47	0.54812	0.605	0.286	4.281e-43	46.894	LMNA
GPR183	1.31763e-47	0.494418	0.531	0.22	4.41907e-43	46.8802	GPR183
SARAF	1.57169e-47	0.373349	0.629	0.283	5.27115e-43	46.8036	SARAF
ITGAV	1.65942e-47	0.498155	0.396	0.119	5.56536e-43	46.78	ITGAV
ENPP2	1.66666e-47	0.605061	0.185	0.014	5.58966e-43	46.7782	ENPP2
GBP4	1.91923e-47	0.494589	0.359	0.088	6.4367e-43	46.7169	GBP4
RPS6	2.04941e-47	-0.830272	0.953	0.907	6.8733e-43	46.6884	RPS6
CCNI	3.07238e-47	0.313729	0.693	0.346	1.03042e-42	46.5125	CCNI
AGR2	3.18465e-47	-1.03748	0.05	0.161	1.06807e-42	46.4969	AGR2
GBP2	3.34143e-47	0.469547	0.374	0.103	1.12065e-42	46.4761	GBP2
MACF1	3.35081e-47	0.436471	0.395	0.121	1.12379e-42	46.4749	MACF1
2022-03-01	4.14684e-47	0.381328	0.54	0.208	1.39077e-42	46.3823	2022-03-01
PEA15	9.87106e-47	0.408376	0.466	0.162	3.31056e-42	46.0056	PEA15
RSRP1	2.3841e-46	0.450503	0.438	0.143	7.9958e-42	45.6227	RSRP1
ZFP36L2	2.58325e-46	0.407376	0.714	0.37	8.66369e-42	45.5878	ZFP36L2
SMAP2	3.35167e-46	0.463306	0.356	0.096	1.12408e-41	45.4747	SMAP2
RPL37A	4.46227e-46	-0.802518	0.962	0.926	1.49656e-41	45.3504	RPL37A
DDX5	6.20687e-46	0.238607	0.911	0.621	2.08166e-41	45.2071	DDX5
PLXNC1	8.21199e-46	0.411662	0.371	0.113	2.75414e-41	45.0856	PLXNC1
MSR1	1.57881e-45	0.250933	0.724	0.38	5.29501e-41	44.8017	MSR1
EVI2B	1.66642e-45	0.405199	0.464	0.163	5.58884e-41	44.7782	EVI2B
PDCD1LG2	1.67652e-45	0.357119	0.156	0.009	5.62273e-41	44.7756	PDCD1LG2
INSIG1	1.8649e-45	0.629711	0.334	0.096	6.25451e-41	44.7293	INSIG1
RNASE1	1.93456e-45	0.583225	0.724	0.46	6.48812e-41	44.7134	RNASE1
EIF4A3	1.9512e-45	0.441467	0.414	0.141	6.54394e-41	44.7097	EIF4A3
BIRC3	2.48609e-45	0.632209	0.257	0.055	8.33783e-41	44.6045	BIRC3
RPS3	2.77952e-45	-0.837879	0.922	0.888	9.32195e-41	44.556	RPS3
ELL2	3.45042e-45	0.53134	0.437	0.147	1.1572e-40	44.4621	ELL2
SERF2	4.04866e-45	-0.65381	0.977	0.959	1.35784e-40	44.3927	SERF2
MGAT4A	4.3873e-45	0.345588	0.493	0.181	1.47141e-40	44.3578	MGAT4A
P4HB	4.54992e-45	0.296315	0.616	0.284	1.52595e-40	44.342	P4HB
PFKFB3	9.42596e-45	0.539098	0.323	0.088	3.16128e-40	44.0257	PFKFB3
IL18BP	1.21383e-44	0.412663	0.198	0.026	4.07095e-40	43.9158	IL18BP
NACA	1.41106e-44	0.233631	0.917	0.687	4.73241e-40	43.8505	NACA
LGALS3BP	1.5548e-44	0.305727	0.587	0.245	5.21449e-40	43.8083	LGALS3BP
HSD17B4	1.91935e-44	0.387775	0.272	0.054	6.43712e-40	43.7168	HSD17B4
ARL4C	2.04777e-44	0.476633	0.495	0.203	6.86782e-40	43.6887	ARL4C
MS4A6A	2.60636e-44	0.369297	0.791	0.51	8.7412e-40	43.584	MS4A6A
CLTC	2.73509e-44	0.339869	0.523	0.197	9.17294e-40	43.563	CLTC
EEF1A1	2.98119e-44	0.223119	0.997	0.952	9.99832e-40	43.5256	EEF1A1
NUB1	3.53182e-44	0.437737	0.365	0.105	1.1845e-39	43.452	NUB1
GRN	4.57902e-44	0.228051	0.941	0.744	1.53571e-39	43.3392	GRN
CD14	5.36459e-44	0.405102	0.798	0.516	1.79918e-39	43.2705	CD14
RNH1	6.07561e-44	0.251224	0.612	0.286	2.03764e-39	43.2164	RNH1
TTC3	8.21666e-44	0.403735	0.381	0.115	2.7557e-39	43.0853	TTC3
IGLC3	8.38383e-44	2.8506	0.193	0.012	2.81177e-39	43.0766	IGLC3
MGAT1	1.37025e-43	0.343305	0.583	0.239	4.59556e-39	42.8632	MGAT1
FCGR2B	1.45448e-43	0.45884	0.454	0.173	4.87804e-39	42.8373	FCGR2B
ARHGDIB	1.46773e-43	0.249079	0.795	0.494	4.92249e-39	42.8334	ARHGDIB
ERO1A	1.661e-43	0.540739	0.307	0.077	5.57067e-39	42.7796	ERO1A
EIF1	1.87225e-43	0.234392	0.943	0.721	6.27915e-39	42.7276	EIF1
CTSA	2.20693e-43	0.287512	0.619	0.289	7.40161e-39	42.6562	CTSA
SF3B1	2.63204e-43	0.342167	0.464	0.167	8.82732e-39	42.5797	SF3B1
NDUFA4	3.00294e-43	-1.04072	0.714	0.687	1.00712e-38	42.5225	NDUFA4
TRMT112	4.48873e-43	-0.991724	0.397	0.437	1.50543e-38	42.3479	TRMT112
FCER1G	6.67746e-43	-0.806026	0.949	0.915	2.23949e-38	42.1754	FCER1G
NUFIP2	8.6317e-43	0.44347	0.423	0.136	2.8949e-38	42.0639	NUFIP2
LCP2	1.0355e-42	0.337313	0.513	0.195	3.47286e-38	41.9848	LCP2
TNFRSF14	1.23257e-42	0.379547	0.401	0.128	4.13379e-38	41.9092	TNFRSF14
DRAP1	1.73553e-42	-1.08693	0.329	0.383	5.82063e-38	41.7606	DRAP1
CCAR1	1.80604e-42	0.320278	0.297	0.07	6.05708e-38	41.7433	CCAR1
SQSTM1	3.61348e-42	0.303627	0.692	0.359	1.21189e-37	41.4421	SQSTM1
LTA4H	4.21666e-42	0.524129	0.402	0.14	1.41418e-37	41.375	LTA4H
IGLC2	4.26614e-42	3.38121	0.284	0.053	1.43078e-37	41.37	IGLC2
TAX1BP1	5.4846e-42	0.370023	0.477	0.172	1.83942e-37	41.2609	TAX1BP1
TYMP	8.61377e-42	0.307612	0.871	0.643	2.88889e-37	41.0648	TYMP
EIF4G2	8.73362e-42	0.265226	0.646	0.305	2.92908e-37	41.0588	EIF4G2
PTGES3	1.42097e-41	0.23504	0.68	0.333	4.76566e-37	40.8474	PTGES3
RPL19	1.80637e-41	-0.628311	0.974	0.952	6.05821e-37	40.7432	RPL19
ZFP36L1	2.1591e-41	0.418207	0.842	0.563	7.2412e-37	40.6657	ZFP36L1
N4BP2L2	2.72583e-41	0.285015	0.544	0.224	9.14189e-37	40.5645	N4BP2L2
SELENOH	7.25886e-41	-0.947878	0.333	0.391	2.43447e-36	40.1391	SELENOH
YBX3	7.4817e-41	0.400081	0.457	0.17	2.50921e-36	40.126	YBX3
ZNF292	1.15137e-40	0.418901	0.277	0.068	3.86147e-36	39.9388	ZNF292
OAZ1	1.55206e-40	-0.719768	0.945	0.904	5.2053e-36	39.8091	OAZ1
GCC2	1.97306e-40	0.378969	0.321	0.086	6.61726e-36	39.7049	GCC2
FCHO2	1.98894e-40	0.398612	0.309	0.076	6.67052e-36	39.7014	FCHO2
PKIB	2.72434e-40	-0.928754	0.132	0.235	9.13689e-36	39.5647	PKIB
EIF5	3.26691e-40	0.266825	0.586	0.262	1.09565e-35	39.4859	EIF5
CMKLR1	4.79404e-40	0.398016	0.257	0.052	1.60783e-35	39.3193	CMKLR1
CDC42	5.10698e-40	0.204921	0.781	0.437	1.71278e-35	39.2918	CDC42
NUCB1	6.08575e-40	0.359383	0.407	0.13	2.04104e-35	39.2157	NUCB1
RASGEF1B	6.42694e-40	0.476563	0.383	0.12	2.15547e-35	39.192	RASGEF1B
USP9X	8.04889e-40	0.364828	0.344	0.099	2.69944e-35	39.0943	USP9X
PDE4DIP	8.53155e-40	0.403791	0.265	0.064	2.86131e-35	39.069	PDE4DIP
SLC7A7	9.1119e-40	0.307277	0.476	0.191	3.05595e-35	39.0404	SLC7A7
FAM20A	1.07818e-39	0.378421	0.169	0.023	3.61601e-35	38.9673	FAM20A
ATP6AP1	1.64626e-39	0.291339	0.557	0.239	5.52124e-35	38.7835	ATP6AP1
CLEC7A	2.50255e-39	0.283429	0.601	0.278	8.39306e-35	38.6016	CLEC7A
ABI1	2.51195e-39	0.351244	0.421	0.135	8.42456e-35	38.6	ABI1
DNAJB1	2.67071e-39	0.648698	0.67	0.404	8.95704e-35	38.5734	DNAJB1
PRCP	2.76861e-39	0.319918	0.407	0.135	9.28535e-35	38.5577	PRCP
NCKAP1L	3.37034e-39	0.333045	0.463	0.17	1.13035e-34	38.4723	NCKAP1L
DYNC1H1	3.9513e-39	0.384765	0.431	0.155	1.32519e-34	38.4033	DYNC1H1
MPEG1	4.21608e-39	0.402661	0.403	0.133	1.41399e-34	38.3751	MPEG1
NR1H3	4.44767e-39	0.446426	0.342	0.102	1.49166e-34	38.3519	NR1H3
GADD45B	5.26422e-39	0.357957	0.653	0.342	1.76551e-34	38.2787	GADD45B
COX7A2	6.16269e-39	-0.975381	0.715	0.696	2.06684e-34	38.2102	COX7A2
SDS	6.82788e-39	-1.13225	0.203	0.29	2.28993e-34	38.1657	SDS
DPP7	9.93921e-39	0.286919	0.553	0.235	3.33341e-34	38.0026	DPP7
BMP2K	1.12761e-38	0.28169	0.542	0.238	3.78178e-34	37.9478	BMP2K
GHITM	1.1412e-38	0.291896	0.495	0.199	3.82737e-34	37.9426	GHITM
CYFIP1	1.20517e-38	0.330753	0.489	0.194	4.04191e-34	37.919	CYFIP1
FLNA	1.54777e-38	0.338498	0.469	0.182	5.1909e-34	37.8103	FLNA
HLA-DMA	1.71634e-38	0.143173	0.871	0.577	5.75625e-34	37.7654	HLA-DMA
TCIRG1	1.88341e-38	0.34647	0.394	0.127	6.31657e-34	37.7251	TCIRG1
AKAP13	1.90243e-38	0.384597	0.443	0.165	6.38037e-34	37.7207	AKAP13
ALOX5AP	2.28672e-38	-1.21902	0.657	0.628	7.66922e-34	37.6408	ALOX5AP
LILRB2	2.43695e-38	0.38067	0.284	0.068	8.17305e-34	37.6132	LILRB2
CD55	2.53487e-38	0.45285	0.235	0.053	8.50145e-34	37.596	CD55
ITGAM	2.57988e-38	0.30389	0.422	0.142	8.65241e-34	37.5884	ITGAM
CD86	2.76646e-38	0.253192	0.517	0.2	9.27814e-34	37.5581	CD86
ADAMTSL4	4.03524e-38	0.307084	0.154	0.017	1.35334e-33	37.3941	ADAMTSL4
TSC22D1	4.17217e-38	0.521548	0.302	0.096	1.39926e-33	37.3796	TSC22D1
CD40	4.38743e-38	0.390763	0.302	0.073	1.47146e-33	37.3578	CD40
TPP1	4.72809e-38	0.228653	0.673	0.334	1.58571e-33	37.3253	TPP1
SERPINF1	5.05734e-38	0.324534	0.507	0.216	1.69613e-33	37.2961	SERPINF1
CEP350	5.33519e-38	0.387753	0.287	0.07	1.78932e-33	37.2728	CEP350
IL2RA	5.38779e-38	0.376729	0.126	0.007	1.80696e-33	37.2686	IL2RA
ATRX	5.67408e-38	0.319897	0.422	0.145	1.90297e-33	37.2461	ATRX
CCL2	8.16387e-38	-1.66949	0.274	0.364	2.738e-33	37.0881	CCL2
CRABP2	9.98945e-38	-0.630047	0.018	0.108	3.35026e-33	37.0005	CRABP2
TAP1	1.18582e-37	0.400082	0.347	0.101	3.97699e-33	36.926	TAP1
ISG20	1.24259e-37	-1.26556	0.115	0.19	4.16739e-33	36.9057	ISG20
VCAM1	1.45147e-37	0.437447	0.143	0.011	4.86793e-33	36.8382	VCAM1
PSMD1	1.45737e-37	0.355982	0.336	0.091	4.88774e-33	36.8364	PSMD1
ATP6V0A1	1.53291e-37	0.427635	0.314	0.089	5.14106e-33	36.8145	ATP6V0A1
RHOB	1.86805e-37	0.321148	0.653	0.344	6.26505e-33	36.7286	RHOB
DRAM1	1.88938e-37	0.337183	0.342	0.092	6.33661e-33	36.7237	DRAM1
RAC1	2.1616e-37	0.117411	0.885	0.608	7.24959e-33	36.6652	RAC1
RBMS1	3.09801e-37	0.336535	0.418	0.139	1.03901e-32	36.5089	RBMS1
TXNL1	4.83136e-37	0.331431	0.383	0.122	1.62034e-32	36.3159	TXNL1
RPS8	4.90837e-37	-0.713375	0.974	0.94	1.64617e-32	36.3091	RPS8
GNAQ	6.13609e-37	0.338826	0.481	0.191	2.05792e-32	36.2121	GNAQ
STX12	7.52198e-37	0.334805	0.315	0.087	2.52272e-32	36.1237	STX12
CD302	1.03462e-36	0.427273	0.326	0.096	3.46992e-32	35.9852	CD302
SEC61G	1.11468e-36	-1.02412	0.544	0.555	3.73841e-32	35.9529	SEC61G
CD59	1.25103e-36	0.35803	0.454	0.173	4.19571e-32	35.9027	CD59
HEXA	1.46204e-36	0.300937	0.552	0.24	4.90339e-32	35.835	HEXA
IL7R	1.54831e-36	0.595814	0.205	0.038	5.19273e-32	35.8101	IL7R
CD163	1.85448e-36	0.442598	0.484	0.206	6.21957e-32	35.7318	CD163
MAF	1.86698e-36	0.694862	0.412	0.164	6.26146e-32	35.7289	MAF
CCNL1	2.21828e-36	0.343652	0.573	0.265	7.43966e-32	35.654	CCNL1
CEBPB	2.58808e-36	0.30266	0.64	0.326	8.6799e-32	35.587	CEBPB
ZFYVE16	4.09947e-36	0.383716	0.294	0.08	1.37488e-31	35.3873	ZFYVE16
PRRC2C	4.18097e-36	0.294671	0.559	0.252	1.40221e-31	35.3787	PRRC2C
RPS3A	4.70035e-36	0.134386	0.962	0.778	1.57641e-31	35.3279	RPS3A
M6PR	4.78149e-36	0.276612	0.506	0.212	1.60362e-31	35.3204	M6PR
PPP1R12A	5.12145e-36	0.361248	0.336	0.102	1.71763e-31	35.2906	PPP1R12A
RPL9	5.74174e-36	0.10908	0.966	0.785	1.92566e-31	35.241	RPL9
COL4A3BP	6.6124e-36	0.335075	0.25	0.057	2.21767e-31	35.1796	COL4A3BP
RBM47	1.12111e-35	0.309136	0.447	0.165	3.75998e-31	34.9504	RBM47
NUPR1	1.58369e-35	0.161022	0.717	0.421	5.31138e-31	34.8003	NUPR1
EGR1	1.7877e-35	0.490945	0.546	0.276	5.99559e-31	34.7477	EGR1
PPP1R15A	1.79507e-35	0.357084	0.599	0.294	6.0203e-31	34.7459	PPP1R15A
MAT2A	1.91824e-35	0.340006	0.455	0.18	6.43339e-31	34.7171	MAT2A
DNAJB6	2.25042e-35	0.375429	0.569	0.262	7.54748e-31	34.6477	DNAJB6
ITGAX	3.17155e-35	0.342721	0.44	0.161	1.06367e-30	34.4987	ITGAX
FXR1	4.13978e-35	0.31316	0.286	0.081	1.3884e-30	34.383	FXR1
MAP1LC3B	4.64517e-35	0.302437	0.519	0.226	1.5579e-30	34.333	MAP1LC3B
PPA1	6.37998e-35	0.492154	0.39	0.156	2.13972e-30	34.1952	PPA1
JUNB	7.01233e-35	0.224515	0.792	0.502	2.3518e-30	34.1541	JUNB
TCP1	8.79272e-35	0.315694	0.323	0.098	2.9489e-30	34.0559	TCP1
SCAF11	1.07502e-34	0.232031	0.516	0.227	3.60541e-30	33.9686	SCAF11
SPEN	1.08683e-34	0.364259	0.225	0.044	3.64501e-30	33.9638	SPEN
RPL34	1.17481e-34	-0.662576	0.981	0.948	3.94009e-30	33.93	RPL34
NRP2	1.88929e-34	0.301212	0.454	0.18	6.33631e-30	33.7237	NRP2
COX17	2.03335e-34	-1.00647	0.345	0.39	6.81943e-30	33.6918	COX17
RPS16	2.48687e-34	-0.76699	0.949	0.897	8.34045e-30	33.6043	RPS16
DSC2	2.6626e-34	0.325955	0.201	0.04	8.92982e-30	33.5747	DSC2
RPL10A	2.74447e-34	-0.897769	0.839	0.781	9.2044e-30	33.5615	RPL10A
PTMS	2.74852e-34	0.260141	0.528	0.227	9.21798e-30	33.5609	PTMS
IFIT1	2.93798e-34	-1.06474	0.103	0.185	9.85339e-30	33.532	IFIT1
POLR2L	3.99051e-34	-1.08328	0.58	0.553	1.33834e-29	33.399	POLR2L
ACTR3	4.65305e-34	0.236148	0.644	0.323	1.56054e-29	33.3323	ACTR3
S100A10	4.68124e-34	0.496961	0.897	0.728	1.56999e-29	33.3296	S100A10
LILRB5	5.20331e-34	0.51595	0.171	0.025	1.74508e-29	33.2837	LILRB5
PDGFC	5.24483e-34	0.349982	0.148	0.023	1.75901e-29	33.2803	PDGFC
YPEL5	5.57036e-34	0.378286	0.36	0.127	1.86819e-29	33.2541	YPEL5
ABCC3	5.84488e-34	0.331035	0.333	0.099	1.96026e-29	33.2332	ABCC3
2022-03-02	6.38081e-34	0.316277	0.286	0.082	2.13999e-29	33.1951	2022-03-02
JUN	6.94905e-34	0.478804	0.825	0.614	2.33057e-29	33.1581	JUN
SPPL2A	8.43586e-34	0.256858	0.423	0.156	2.82922e-29	33.0739	SPPL2A
TNFAIP2	8.55838e-34	0.326639	0.433	0.17	2.87031e-29	33.0676	TNFAIP2
CD84	9.80019e-34	0.18456	0.611	0.298	3.28679e-29	33.0088	CD84
ZBTB38	9.84258e-34	0.33138	0.258	0.066	3.301e-29	33.0069	ZBTB38
WSB1	1.14597e-33	0.202872	0.674	0.355	3.84336e-29	32.9408	WSB1
MYO5A	1.63345e-33	0.345256	0.268	0.072	5.47827e-29	32.7869	MYO5A
MYOF	1.77819e-33	0.295723	0.233	0.055	5.96369e-29	32.75	MYOF
AC020916.1	2.19502e-33	0.485397	0.356	0.125	7.36164e-29	32.6586	AC020916.1
PLA2G2D	2.3087e-33	0.518729	0.109	0.005	7.74292e-29	32.6366	PLA2G2D
AOAH	2.3787e-33	0.353798	0.243	0.056	7.97767e-29	32.6237	AOAH
ANXA4	2.4063e-33	0.2692	0.364	0.128	8.07024e-29	32.6187	ANXA4
UQCRQ	2.44832e-33	-0.962843	0.656	0.636	8.21117e-29	32.6111	UQCRQ
YWHAB	2.63042e-33	0.164473	0.773	0.472	8.82191e-29	32.58	YWHAB
GRINA	2.76097e-33	0.268861	0.537	0.231	9.25975e-29	32.5589	GRINA
ATF5	3.25406e-33	0.322903	0.377	0.129	1.09135e-28	32.4876	ATF5
PICALM	3.34568e-33	0.289083	0.404	0.141	1.12207e-28	32.4755	PICALM
RAB5C	3.90528e-33	0.191284	0.601	0.284	1.30975e-28	32.4083	RAB5C
HNRNPA2B1	4.25052e-33	0.194552	0.776	0.466	1.42554e-28	32.3716	HNRNPA2B1
CAP1	4.26353e-33	0.126565	0.783	0.471	1.4299e-28	32.3702	CAP1
RPL7	4.87233e-33	-0.870965	0.86	0.8	1.63408e-28	32.3123	RPL7
TLR7	5.13917e-33	0.369453	0.235	0.052	1.72357e-28	32.2891	TLR7
GATAD1	6.21957e-33	0.313346	0.283	0.087	2.08592e-28	32.2062	GATAD1
FAM107B	6.65419e-33	0.339577	0.316	0.086	2.23168e-28	32.1769	FAM107B
RPL8	1.06566e-32	-0.63285	0.956	0.93	3.57401e-28	31.9724	RPL8
MSN	1.14634e-32	0.259241	0.602	0.284	3.84459e-28	31.9407	MSN
BCLAF1	1.15961e-32	0.332766	0.35	0.113	3.88911e-28	31.9357	BCLAF1
IL10RA	1.17141e-32	0.318623	0.329	0.101	3.92869e-28	31.9313	IL10RA
TMEM70	1.44907e-32	0.320668	0.337	0.117	4.85991e-28	31.8389	TMEM70
CANX	1.63414e-32	0.185018	0.67	0.353	5.48059e-28	31.7867	CANX
AHCYL1	1.75484e-32	0.351401	0.331	0.101	5.88539e-28	31.7558	AHCYL1
APBB1IP	1.77304e-32	0.274286	0.443	0.169	5.94642e-28	31.7513	APBB1IP
PFKL	2.02249e-32	0.294027	0.372	0.123	6.78303e-28	31.6941	PFKL
MCTP1	2.50896e-32	0.345442	0.192	0.037	8.41455e-28	31.6005	MCTP1
SEL1L	2.77171e-32	0.324618	0.247	0.064	9.29576e-28	31.5573	SEL1L
OCIAD1	2.82464e-32	0.266171	0.398	0.137	9.47329e-28	31.549	OCIAD1
SLAMF7	3.79726e-32	0.421821	0.195	0.038	1.27353e-27	31.4205	SLAMF7
RIF1	4.05478e-32	0.341731	0.205	0.042	1.35989e-27	31.392	RIF1
CD53	4.0626e-32	0.113026	0.697	0.386	1.36251e-27	31.3912	CD53
F13A1	4.44607e-32	1.07921	0.15	0.03	1.49112e-27	31.352	F13A1
SEMA4A	4.73719e-32	0.360231	0.271	0.073	1.58876e-27	31.3245	SEMA4A
TACC1	4.87468e-32	0.349515	0.416	0.161	1.63487e-27	31.3121	TACC1
PEPD	5.82655e-32	0.343858	0.362	0.119	1.95411e-27	31.2346	PEPD
CAT	5.8887e-32	0.35499	0.305	0.089	1.97495e-27	31.23	CAT
MPP1	6.02852e-32	0.281069	0.418	0.158	2.02185e-27	31.2198	MPP1
EGLN3	6.74137e-32	0.386324	0.103	0.006	2.26092e-27	31.1713	EGLN3
COPB2	7.45292e-32	0.245503	0.248	0.06	2.49956e-27	31.1277	COPB2
TKT	1.01011e-31	0.292539	0.427	0.172	3.38771e-27	30.9956	TKT
SOCS3	1.06274e-31	0.368496	0.273	0.073	3.56422e-27	30.9736	SOCS3
IL21R	1.09202e-31	0.275621	0.115	0.009	3.66241e-27	30.9618	IL21R
TNFSF13B	1.11836e-31	0.110123	0.663	0.351	3.75077e-27	30.9514	TNFSF13B
IFI16	1.25442e-31	0.177301	0.59	0.279	4.20706e-27	30.9016	IFI16
WNK1	1.34055e-31	0.306545	0.384	0.138	4.49592e-27	30.8727	WNK1
PPP1R15B	1.34609e-31	0.33847	0.249	0.068	4.51451e-27	30.8709	PPP1R15B
TLR4	1.42402e-31	0.352467	0.303	0.092	4.77587e-27	30.8465	TLR4
PCNX4	1.58102e-31	0.569334	0.231	0.057	5.30244e-27	30.8011	PCNX4
PPP1R10	1.83011e-31	0.341963	0.32	0.105	6.13783e-27	30.7375	PPP1R10
RDX	1.8555e-31	0.28024	0.353	0.114	6.22298e-27	30.7315	RDX
PRPF40A	1.92734e-31	0.267862	0.458	0.183	6.46392e-27	30.715	PRPF40A
GSN	1.93583e-31	0.126707	0.751	0.458	6.49237e-27	30.7131	GSN
BLOC1S6	2.04072e-31	0.348712	0.292	0.087	6.84417e-27	30.6902	BLOC1S6
SELPLG	2.29443e-31	0.339265	0.356	0.115	7.69506e-27	30.6393	SELPLG
AKAP9	3.16263e-31	0.2512	0.442	0.173	1.06068e-26	30.5	AKAP9
JUND	3.16333e-31	0.269163	0.661	0.349	1.06092e-26	30.4999	JUND
TIMP2	3.81211e-31	0.211112	0.654	0.336	1.2785e-26	30.4188	TIMP2
PTPN6	5.04984e-31	0.257254	0.379	0.138	1.69362e-26	30.2967	PTPN6
VPS28	5.659e-31	0.176824	0.581	0.276	1.89791e-26	30.2473	VPS28
C8orf59	6.72395e-31	0.2469	0.362	0.116	2.25508e-26	30.1724	C8orf59
SCD	6.8052e-31	0.385965	0.39	0.149	2.28233e-26	30.1672	SCD
AP2A2	7.66463e-31	0.353773	0.314	0.103	2.57056e-26	30.1155	AP2A2
PDXK	8.0141e-31	0.266449	0.493	0.208	2.68777e-26	30.0961	PDXK
COX8A	8.07639e-31	-0.938231	0.607	0.583	2.70866e-26	30.0928	COX8A
NR3C1	8.30861e-31	0.339015	0.335	0.114	2.78654e-26	30.0805	NR3C1
RARRES3	1.26876e-30	0.327071	0.376	0.129	4.25516e-26	29.8966	RARRES3
CLIC2	1.3526e-30	0.292683	0.145	0.022	4.53636e-26	29.8688	CLIC2
CAPN1	1.39916e-30	0.280633	0.252	0.07	4.6925e-26	29.8541	CAPN1
TFG	1.61083e-30	0.297868	0.248	0.064	5.40239e-26	29.793	TFG
MARCKS	1.75869e-30	0.207497	0.911	0.712	5.89829e-26	29.7548	MARCKS
GIMAP4	1.87296e-30	0.170969	0.504	0.205	6.28153e-26	29.7275	GIMAP4
ATM	2.48319e-30	0.35989	0.328	0.1	8.32813e-26	29.605	ATM
GADD45G	2.80702e-30	0.476894	0.332	0.115	9.41419e-26	29.5518	GADD45G
ARHGDIA	2.86379e-30	0.251922	0.459	0.188	9.60457e-26	29.5431	ARHGDIA
TNFAIP8	3.0359e-30	0.342759	0.31	0.09	1.01818e-25	29.5177	TNFAIP8
NSA2	3.21938e-30	0.227905	0.469	0.201	1.07972e-25	29.4922	NSA2
OLR1	3.22023e-30	0.310544	0.613	0.333	1.08e-25	29.4921	OLR1
PHIP	3.28261e-30	0.304432	0.322	0.105	1.10092e-25	29.4838	PHIP
ATP2B1	3.42793e-30	0.349825	0.332	0.117	1.14966e-25	29.465	ATP2B1
TNS3	3.60602e-30	0.283725	0.31	0.095	1.20939e-25	29.443	TNS3
FOXO3	3.77302e-30	0.350085	0.277	0.082	1.2654e-25	29.4233	FOXO3
INTS6	3.90162e-30	0.408959	0.338	0.125	1.30853e-25	29.4088	INTS6
PKM	4.30527e-30	0.154728	0.757	0.471	1.4439e-25	29.366	PKM
UNC93B1	4.59224e-30	0.229639	0.461	0.187	1.54014e-25	29.338	UNC93B1
EEF1B2	4.86734e-30	0.119233	0.758	0.465	1.63241e-25	29.3127	EEF1B2
IDI1	5.03964e-30	0.311148	0.215	0.049	1.6902e-25	29.2976	IDI1
PTBP3	5.28171e-30	0.307197	0.339	0.109	1.77138e-25	29.2772	PTBP3
EPRS	7.30898e-30	0.259038	0.235	0.059	2.45129e-25	29.1361	EPRS
KLF6	7.38394e-30	0.400879	0.825	0.585	2.47643e-25	29.1317	KLF6
SGK1	7.82422e-30	0.192095	0.771	0.483	2.62409e-25	29.1066	SGK1
AIDA	9.21488e-30	0.303074	0.245	0.059	3.09049e-25	29.0355	AIDA
TAGAP	1.00387e-29	0.351472	0.275	0.08	3.36678e-25	28.9983	TAGAP
MMP19	1.19988e-29	0.470234	0.183	0.041	4.02415e-25	28.9209	MMP19
GRB2	1.21878e-29	0.202033	0.586	0.289	4.08754e-25	28.9141	GRB2
SHTN1	1.2374e-29	0.265042	0.307	0.092	4.15e-25	28.9075	SHTN1
PTPN1	1.31452e-29	0.290778	0.273	0.08	4.40863e-25	28.8812	PTPN1
ATP5F1E	1.89452e-29	-0.608798	0.974	0.937	6.35383e-25	28.7225	ATP5F1E
ZBTB20	1.92529e-29	0.315526	0.283	0.086	6.45703e-25	28.7155	ZBTB20
JMJD1C	2.35295e-29	0.339169	0.358	0.126	7.89133e-25	28.6284	JMJD1C
RALGDS	2.6741e-29	0.292439	0.278	0.078	8.9684e-25	28.5728	RALGDS
IFNAR1	2.7312e-29	0.277428	0.333	0.105	9.15989e-25	28.5636	IFNAR1
ATG3	2.75417e-29	0.21642	0.385	0.138	9.23693e-25	28.56	ATG3
CNDP2	2.87776e-29	0.241242	0.436	0.173	9.65144e-25	28.5409	CNDP2
CD4	2.9051e-29	0.193933	0.543	0.251	9.74312e-25	28.5368	CD4
AC020656.1	3.46426e-29	0.304263	0.459	0.188	1.16184e-24	28.4604	AC020656.1
CD68	3.66385e-29	0.0575299	0.863	0.591	1.22878e-24	28.4361	CD68
CASP4	3.83215e-29	0.250448	0.379	0.142	1.28523e-24	28.4166	CASP4
RPS15A	5.06935e-29	-0.672233	0.972	0.923	1.70016e-24	28.295	RPS15A
SH3BP5	5.25512e-29	0.339422	0.202	0.049	1.76246e-24	28.2794	SH3BP5
EPS15	5.33801e-29	0.343143	0.282	0.081	1.79026e-24	28.2726	EPS15
C6orf48	5.40999e-29	-0.810881	0.198	0.265	1.8144e-24	28.2668	C6orf48
GATA3	5.66593e-29	-0.707995	0.062	0.133	1.90024e-24	28.2467	GATA3
MS4A7	6.53633e-29	0.337655	0.757	0.511	2.19215e-24	28.1847	MS4A7
ENO1	7.62395e-29	0.102785	0.78	0.5	2.55692e-24	28.1178	ENO1
GNAI3	9.24361e-29	0.222039	0.426	0.166	3.10012e-24	28.0342	GNAI3
SCPEP1	9.64353e-29	0.259724	0.415	0.158	3.23425e-24	28.0158	SCPEP1
MAML2	1.00733e-28	0.335427	0.255	0.071	3.37837e-24	27.9968	MAML2
TMEM37	1.05709e-28	0.320339	0.212	0.048	3.54527e-24	27.9759	TMEM37
KDELR1	1.08667e-28	0.261491	0.414	0.158	3.64447e-24	27.9639	KDELR1
AAK1	1.12407e-28	0.31442	0.327	0.11	3.7699e-24	27.9492	AAK1
VDAC1	1.20456e-28	0.209014	0.561	0.28	4.03986e-24	27.9192	VDAC1
UQCR11	1.22254e-28	-0.899503	0.744	0.677	4.10014e-24	27.9127	UQCR11
CD58	1.28041e-28	0.237872	0.341	0.113	4.29424e-24	27.8927	CD58
RPL12	1.40998e-28	-0.658709	0.982	0.94	4.7288e-24	27.8508	RPL12
SNX5	1.48914e-28	0.229418	0.373	0.131	4.99428e-24	27.8271	SNX5
PLXND1	1.516e-28	0.25705	0.376	0.133	5.08436e-24	27.8193	PLXND1
KPNB1	1.65601e-28	0.241498	0.463	0.189	5.55392e-24	27.7809	KPNB1
HAPLN3	1.69636e-28	0.286921	0.128	0.017	5.68925e-24	27.7705	HAPLN3
NEMF	1.78192e-28	0.220188	0.285	0.082	5.97622e-24	27.7491	NEMF
TLR2	1.91488e-28	0.298445	0.307	0.092	6.42211e-24	27.7179	TLR2
TCN2	1.94657e-28	0.301668	0.228	0.047	6.52842e-24	27.7107	TCN2
CALR	2.05593e-28	0.186937	0.766	0.484	6.89518e-24	27.687	CALR
WIPF1	2.11632e-28	0.241066	0.453	0.184	7.09771e-24	27.6744	WIPF1
KLF9	2.29897e-28	0.364101	0.164	0.029	7.71029e-24	27.6385	KLF9
P4HA1	2.37165e-28	0.336117	0.342	0.121	7.95405e-24	27.6249	P4HA1
MVP	2.63965e-28	0.290968	0.303	0.094	8.85286e-24	27.5785	MVP
BNIP2	2.67614e-28	0.219752	0.347	0.122	8.97524e-24	27.5725	BNIP2
SCARB2	3.42617e-28	0.231183	0.495	0.201	1.14907e-23	27.4652	SCARB2
NIPBL	3.44398e-28	0.272513	0.292	0.085	1.15504e-23	27.4629	NIPBL
NPL	3.49025e-28	0.206724	0.425	0.176	1.17056e-23	27.4571	NPL
AP2M1	3.93817e-28	0.1658	0.556	0.269	1.32078e-23	27.4047	AP2M1
NCEH1	3.94379e-28	0.279372	0.326	0.101	1.32267e-23	27.4041	NCEH1
ADAP2	4.48726e-28	0.238976	0.62	0.326	1.50494e-23	27.348	ADAP2
SPP1	4.66334e-28	-0.423702	0.592	0.729	1.56399e-23	27.3313	SPP1
TOMM20	4.73524e-28	0.257863	0.484	0.21	1.58811e-23	27.3247	TOMM20
SETX	5.22488e-28	0.285501	0.287	0.079	1.75232e-23	27.2819	SETX
IER5	5.39362e-28	0.321526	0.45	0.191	1.80891e-23	27.2681	IER5
TMSB10	7.23143e-28	-0.380431	0.999	0.997	2.42528e-23	27.1408	TMSB10
TUBB4B	7.94881e-28	0.29399	0.403	0.164	2.66587e-23	27.0997	TUBB4B
SCGB2A2	8.34565e-28	-0.91559	0.121	0.182	2.79896e-23	27.0785	SCGB2A2
SLIRP	1.03282e-27	-0.9351	0.406	0.407	3.46386e-23	26.986	SLIRP
PTTG1IP	1.04288e-27	0.149075	0.504	0.224	3.49763e-23	26.9818	PTTG1IP
RB1CC1	1.10013e-27	0.288537	0.203	0.047	3.68962e-23	26.9586	RB1CC1
THEMIS2	1.19263e-27	0.303179	0.32	0.105	3.99984e-23	26.9235	THEMIS2
BTN2A2	1.24362e-27	0.27039	0.156	0.027	4.17084e-23	26.9053	BTN2A2
IRAK3	1.32354e-27	0.276237	0.179	0.033	4.43889e-23	26.8783	IRAK3
NKTR	1.33705e-27	0.317352	0.309	0.098	4.48421e-23	26.8739	NKTR
POLR2F	1.4931e-27	-0.803514	0.18	0.235	5.00757e-23	26.8259	POLR2F
SCAMP2	1.50479e-27	0.208082	0.459	0.188	5.04677e-23	26.8225	SCAMP2
RIPK2	1.56558e-27	0.296462	0.217	0.062	5.25063e-23	26.8053	RIPK2
NTAN1	1.73247e-27	0.298235	0.276	0.078	5.81036e-23	26.7613	NTAN1
COX7C	1.79058e-27	-0.782099	0.844	0.78	6.00525e-23	26.747	COX7C
AES	1.87189e-27	0.262283	0.346	0.112	6.27796e-23	26.7277	AES
SLC1A3	2.21641e-27	0.273903	0.458	0.192	7.43341e-23	26.6543	SLC1A3
DYNC1LI1	2.28173e-27	0.25335	0.229	0.058	7.65247e-23	26.6417	DYNC1LI1
CALM2	2.60802e-27	-0.773518	0.833	0.764	8.74679e-23	26.5837	CALM2
2022-09-07	2.67818e-27	0.16921	0.534	0.243	8.98208e-23	26.5722	2022-09-07
EIF3E	2.84264e-27	0.143814	0.574	0.285	9.53364e-23	26.5463	EIF3E
HADHA	2.90132e-27	0.192181	0.399	0.154	9.73044e-23	26.5374	HADHA
CSF1R	3.28018e-27	0.203092	0.571	0.268	1.10011e-22	26.4841	CSF1R
CDKN1A	3.80956e-27	0.310507	0.42	0.181	1.27765e-22	26.4191	CDKN1A
SMARCA5	3.92921e-27	0.268491	0.27	0.08	1.31778e-22	26.4057	SMARCA5
HSPA9	4.29525e-27	0.249533	0.338	0.114	1.44054e-22	26.367	HSPA9
TTC37	4.44109e-27	0.209212	0.198	0.049	1.48945e-22	26.3525	TTC37
SNX9	4.93246e-27	0.263905	0.213	0.056	1.65425e-22	26.3069	SNX9
APOL1	5.31037e-27	0.260476	0.152	0.022	1.78099e-22	26.2749	APOL1
CHI3L1	6.31233e-27	0.561237	0.155	0.028	2.11703e-22	26.1998	CHI3L1
TFDP2	6.54405e-27	0.376952	0.2	0.045	2.19474e-22	26.1842	TFDP2
EIF4B	7.23938e-27	0.256257	0.396	0.159	2.42794e-22	26.1403	EIF4B
UCP2	8.02481e-27	0.270493	0.507	0.233	2.69136e-22	26.0956	UCP2
ZNF644	8.21177e-27	0.296649	0.21	0.051	2.75406e-22	26.0856	ZNF644
FAM133B	8.34457e-27	0.216321	0.497	0.232	2.7986e-22	26.0786	FAM133B
RPN2	8.39016e-27	0.149887	0.526	0.245	2.81389e-22	26.0762	RPN2
CYCS	8.66585e-27	0.263464	0.606	0.333	2.90635e-22	26.0622	CYCS
DNAJC3	1.05759e-26	0.269047	0.312	0.105	3.54695e-22	25.9757	DNAJC3
FARP1	1.4289e-26	0.291016	0.22	0.062	4.79224e-22	25.845	FARP1
CALM1	1.52173e-26	0.0804583	0.856	0.606	5.10359e-22	25.8177	CALM1
FUS	1.52486e-26	0.15365	0.651	0.354	5.11408e-22	25.8168	FUS
TSPAN3	1.56349e-26	0.216227	0.281	0.081	5.24363e-22	25.8059	TSPAN3
LACTB	1.6315e-26	0.201723	0.382	0.148	5.47173e-22	25.7874	LACTB
LINC02345	2.03705e-26	0.248383	0.101	0.012	6.83187e-22	25.691	LINC02345
GK	2.08867e-26	0.346827	0.212	0.06	7.005e-22	25.6801	GK
DYNLT1	2.60071e-26	-0.979314	0.353	0.345	8.72227e-22	25.5849	DYNLT1
HBEGF	2.76057e-26	0.375475	0.27	0.089	9.25839e-22	25.559	HBEGF
LINC01094	2.85682e-26	0.310641	0.279	0.084	9.5812e-22	25.5441	LINC01094
TGM2	3.59364e-26	0.27205	0.162	0.03	1.20523e-21	25.4445	TGM2
CYTIP	4.0632e-26	0.325933	0.221	0.056	1.36272e-21	25.3911	CYTIP
MBD4	4.16737e-26	0.242229	0.309	0.107	1.39765e-21	25.3801	MBD4
ARPC4	4.18473e-26	0.175721	0.583	0.281	1.40347e-21	25.3783	ARPC4
CFLAR	5.16384e-26	0.219506	0.481	0.216	1.73185e-21	25.287	CFLAR
MBNL1	5.32184e-26	0.123273	0.543	0.254	1.78484e-21	25.2739	MBNL1
ZNF148	5.4388e-26	0.288254	0.235	0.061	1.82406e-21	25.2645	ZNF148
ITPR2	5.68144e-26	0.273864	0.305	0.11	1.90544e-21	25.2455	ITPR2
LMO4	5.95894e-26	0.236202	0.355	0.134	1.99851e-21	25.2248	LMO4
AC016831.5	6.29496e-26	0.303586	0.182	0.043	2.1112e-21	25.201	AC016831.5
CX3CR1	6.65891e-26	-0.616542	0.028	0.105	2.23326e-21	25.1766	CX3CR1
DRAM2	7.32233e-26	0.19806	0.43	0.178	2.45576e-21	25.1354	DRAM2
HNRNPUL1	7.89838e-26	0.257221	0.34	0.125	2.64896e-21	25.1025	HNRNPUL1
FCGR1A	7.91513e-26	0.16696	0.53	0.256	2.65458e-21	25.1015	FCGR1A
TANC2	9.88413e-26	0.295542	0.24	0.072	3.31494e-21	25.0051	TANC2
USP18	9.90852e-26	-0.669813	0.051	0.11	3.32312e-21	25.004	USP18
SNRPD2	1.01392e-25	-0.900306	0.439	0.43	3.4005e-21	24.994	SNRPD2
XRCC6	1.04917e-25	0.197774	0.385	0.159	3.51871e-21	24.9792	XRCC6
PBX3	1.10023e-25	0.305955	0.232	0.064	3.68995e-21	24.9585	PBX3
DNTTIP2	1.33626e-25	0.275881	0.199	0.043	4.48156e-21	24.8741	DNTTIP2
EPB41L3	1.34125e-25	0.260676	0.341	0.12	4.49827e-21	24.8725	EPB41L3
SRSF7	1.4513e-25	0.228616	0.544	0.275	4.86738e-21	24.8382	SRSF7
COMT	1.55218e-25	-0.851637	0.253	0.285	5.20571e-21	24.8091	COMT
NDUFV2	1.56735e-25	0.186544	0.49	0.218	5.25657e-21	24.8048	NDUFV2
ASPH	1.8929e-25	0.255026	0.314	0.113	6.34842e-21	24.7229	ASPH
LXN	1.96262e-25	0.229912	0.118	0.02	6.58222e-21	24.7072	LXN
STOM	2.24158e-25	0.186442	0.446	0.18	7.51782e-21	24.6494	STOM
HSP90AB1	2.39119e-25	0.0702559	0.887	0.666	8.01956e-21	24.6214	HSP90AB1
NRP1	2.94434e-25	0.248367	0.366	0.147	9.87471e-21	24.531	NRP1
BEX3	3.9884e-25	-0.746131	0.096	0.169	1.33763e-20	24.3992	BEX3
RLF	4.93363e-25	0.299846	0.169	0.038	1.65464e-20	24.3068	RLF
QKI	5.08765e-25	0.189494	0.558	0.276	1.70629e-20	24.2935	QKI
APC	6.1145e-25	0.246644	0.155	0.032	2.05068e-20	24.2136	APC
FXYD3	6.36668e-25	-0.55499	0.047	0.122	2.13526e-20	24.1961	FXYD3
RAB32	6.96425e-25	0.214203	0.507	0.242	2.33567e-20	24.1571	RAB32
COPA	6.97847e-25	0.211762	0.345	0.121	2.34044e-20	24.1562	COPA
PER1	7.02925e-25	0.320989	0.216	0.058	2.35747e-20	24.1531	PER1
JAK1	7.21901e-25	0.198367	0.392	0.155	2.42111e-20	24.1415	JAK1
OST4	7.76632e-25	-0.828454	0.609	0.569	2.60467e-20	24.1098	OST4
ANXA7	9.1244e-25	0.188276	0.376	0.142	3.06014e-20	24.0398	ANXA7
SLC20A1	1.12019e-24	0.363976	0.353	0.134	3.75689e-20	23.9507	SLC20A1
RECQL	1.13353e-24	0.259586	0.237	0.062	3.80163e-20	23.9456	RECQL
PDCD10	1.14536e-24	0.184111	0.329	0.116	3.84131e-20	23.9411	PDCD10
CD46	1.22017e-24	0.267715	0.293	0.094	4.0922e-20	23.9136	CD46
PLXNB2	1.23862e-24	0.233523	0.341	0.124	4.15407e-20	23.9071	PLXNB2
YPEL3	1.24923e-24	0.284729	0.228	0.068	4.18966e-20	23.9034	YPEL3
ANXA2	1.33812e-24	0.122197	0.864	0.656	4.4878e-20	23.8735	ANXA2
AC058791.1	1.33922e-24	0.293911	0.131	0.025	4.49149e-20	23.8731	AC058791.1
TBXAS1	1.45139e-24	0.277334	0.367	0.134	4.86769e-20	23.8382	TBXAS1
NINJ1	1.53073e-24	0.205902	0.544	0.266	5.13377e-20	23.8151	NINJ1
LMBRD1	1.56439e-24	0.238453	0.275	0.089	5.24666e-20	23.8057	LMBRD1
PDE4B	1.61315e-24	0.331288	0.224	0.069	5.41017e-20	23.7923	PDE4B
EPHX1	1.63612e-24	0.249705	0.168	0.037	5.48721e-20	23.7862	EPHX1
BPTF	1.74768e-24	0.190732	0.302	0.104	5.86137e-20	23.7575	BPTF
RPL36A	1.75718e-24	-0.817954	0.471	0.473	5.89322e-20	23.7552	RPL36A
IFNGR2	1.79421e-24	0.19726	0.545	0.256	6.01743e-20	23.7461	IFNGR2
NDFIP1	2.08746e-24	0.142202	0.469	0.196	7.00093e-20	23.6804	NDFIP1
BTN3A2	2.39918e-24	0.267677	0.232	0.058	8.04638e-20	23.6199	BTN3A2
PAPSS2	2.47702e-24	0.293009	0.148	0.027	8.30744e-20	23.6061	PAPSS2
SLC16A10	2.49257e-24	0.414682	0.17	0.039	8.35957e-20	23.6034	SLC16A10
PSMA1	2.49781e-24	0.14709	0.48	0.219	8.37715e-20	23.6024	PSMA1
CACUL1	2.70696e-24	0.249645	0.29	0.094	9.07861e-20	23.5675	CACUL1
PAK2	2.72809e-24	0.178274	0.465	0.2	9.14946e-20	23.5641	PAK2
BCAS2	2.76126e-24	0.295996	0.259	0.077	9.26073e-20	23.5589	BCAS2
CALCOCO2	3.32501e-24	0.24704	0.21	0.055	1.11514e-19	23.4782	CALCOCO2
PEBP1	4.0322e-24	0.0834803	0.621	0.338	1.35232e-19	23.3945	PEBP1
DUSP3	4.61155e-24	0.244986	0.255	0.075	1.54662e-19	23.3362	DUSP3
RBX1	4.77704e-24	-0.909295	0.643	0.592	1.60212e-19	23.3208	RBX1
AMD1	4.84301e-24	0.284976	0.353	0.132	1.62425e-19	23.3149	AMD1
MXD1	4.86717e-24	0.29508	0.238	0.074	1.63235e-19	23.3127	MXD1
SEMA4D	4.89859e-24	0.282448	0.228	0.057	1.64289e-19	23.3099	SEMA4D
IVNS1ABP	4.93012e-24	0.21562	0.313	0.105	1.65346e-19	23.3071	IVNS1ABP
OS9	5.1054e-24	0.169518	0.42	0.173	1.71225e-19	23.292	OS9
RSAD2	5.11877e-24	-0.823706	0.076	0.138	1.71673e-19	23.2908	RSAD2
PDK4	5.38027e-24	1.40077	0.183	0.069	1.80444e-19	23.2692	PDK4
CCPG1	5.42808e-24	0.260758	0.246	0.072	1.82047e-19	23.2654	CCPG1
SKAP2	5.50903e-24	0.130475	0.506	0.227	1.84762e-19	23.2589	SKAP2
TALDO1	5.84723e-24	0.137848	0.575	0.307	1.96104e-19	23.233	TALDO1
CD151	6.44713e-24	0.191341	0.379	0.149	2.16224e-19	23.1906	CD151
AGPAT2	6.48452e-24	0.242369	0.303	0.103	2.17478e-19	23.1881	AGPAT2
DNASE2	6.79065e-24	0.218898	0.4	0.165	2.27745e-19	23.1681	DNASE2
TGFBR2	6.79491e-24	0.23218	0.333	0.123	2.27888e-19	23.1678	TGFBR2
GLB1	6.85382e-24	0.243984	0.265	0.078	2.29864e-19	23.1641	GLB1
PLEK	6.86159e-24	0.316136	0.586	0.315	2.30124e-19	23.1636	PLEK
DENND3	7.14625e-24	0.255216	0.201	0.053	2.39671e-19	23.1459	DENND3
PECAM1	7.63443e-24	0.253396	0.339	0.122	2.56043e-19	23.1172	PECAM1
ESD	7.69365e-24	0.179904	0.389	0.153	2.5803e-19	23.1139	ESD
CREBL2	8.09055e-24	0.27675	0.321	0.117	2.71341e-19	23.092	CREBL2
STEAP3	8.26514e-24	0.226304	0.14	0.025	2.77196e-19	23.0827	STEAP3
H1FX	8.45478e-24	0.29172	0.275	0.098	2.83556e-19	23.0729	H1FX
COLGALT1	8.65369e-24	0.1917	0.319	0.113	2.90227e-19	23.0628	COLGALT1
SLC11A2	8.90221e-24	0.269869	0.238	0.073	2.98562e-19	23.0505	SLC11A2
RPLP0	9.63913e-24	-0.77869	0.867	0.801	3.23277e-19	23.016	RPLP0
PNPLA8	1.03447e-23	0.235813	0.192	0.043	3.4694e-19	22.9853	PNPLA8
CALU	1.14031e-23	0.227284	0.362	0.135	3.82437e-19	22.943	CALU
ANXA11	1.16036e-23	0.219816	0.372	0.151	3.89163e-19	22.9354	ANXA11
XRN1	1.18063e-23	0.253818	0.206	0.047	3.95959e-19	22.9279	XRN1
PTP4A2	1.21293e-23	0.137166	0.467	0.201	4.06791e-19	22.9162	PTP4A2
IDH1	1.3277e-23	0.199911	0.356	0.133	4.45283e-19	22.8769	IDH1
SDCBP	1.42893e-23	0.0216564	0.827	0.544	4.79233e-19	22.845	SDCBP
GNB4	1.53928e-23	0.174444	0.486	0.214	5.16243e-19	22.8127	GNB4
APOL3	1.57554e-23	0.252327	0.174	0.036	5.28405e-19	22.8026	APOL3
FOXN3	1.58348e-23	0.208824	0.337	0.124	5.31067e-19	22.8004	FOXN3
ARIH1	1.7313e-23	0.317618	0.208	0.058	5.80644e-19	22.7616	ARIH1
TLR1	1.75838e-23	0.267039	0.188	0.043	5.89726e-19	22.7549	TLR1
HMOX1	1.92536e-23	0.179536	0.634	0.35	6.45726e-19	22.7155	HMOX1
TMOD3	2.0021e-23	0.208928	0.293	0.093	6.71464e-19	22.6985	TMOD3
GNA13	2.15877e-23	0.22869	0.373	0.146	7.24008e-19	22.6658	GNA13
CTNNA1	2.2356e-23	0.191539	0.362	0.134	7.49776e-19	22.6506	CTNNA1
CCT8	2.3235e-23	0.210735	0.36	0.134	7.79255e-19	22.6339	CCT8
RELT	2.32665e-23	0.245718	0.182	0.04	7.80313e-19	22.6333	RELT
GSTM3	2.45399e-23	-0.65796	0.052	0.111	8.2302e-19	22.6101	GSTM3
THBD	2.5389e-23	0.368826	0.173	0.043	8.51496e-19	22.5954	THBD
TRIP11	2.65629e-23	0.245159	0.185	0.042	8.90865e-19	22.5757	TRIP11
SNX18	2.91239e-23	0.257812	0.218	0.059	9.76757e-19	22.5358	SNX18
PIAS1	2.93919e-23	0.21066	0.297	0.102	9.85746e-19	22.5318	PIAS1
VPS35	2.98429e-23	0.176653	0.412	0.176	1.00087e-18	22.5252	VPS35
GGNBP2	3.00981e-23	0.23474	0.296	0.101	1.00943e-18	22.5215	GGNBP2
XRCC5	3.06882e-23	0.126148	0.418	0.173	1.02922e-18	22.513	XRCC5
XRN2	3.09385e-23	0.195937	0.335	0.125	1.03761e-18	22.5095	XRN2
CLIC4	3.14545e-23	0.252199	0.246	0.071	1.05492e-18	22.5023	CLIC4
ARFGAP3	3.17444e-23	0.238886	0.209	0.052	1.06464e-18	22.4983	ARFGAP3
ZBTB1	3.18396e-23	0.264122	0.198	0.051	1.06784e-18	22.497	ZBTB1
TBC1D2B	3.32355e-23	0.235407	0.198	0.046	1.11465e-18	22.4784	TBC1D2B
MEF2C	3.4349e-23	-0.898707	0.397	0.407	1.152e-18	22.4641	MEF2C
LMAN1	3.60603e-23	0.23052	0.338	0.123	1.20939e-18	22.443	LMAN1
PYGL	3.916e-23	0.259978	0.174	0.039	1.31335e-18	22.4072	PYGL
STAT3	3.96473e-23	0.15523	0.411	0.166	1.32969e-18	22.4018	STAT3
DHRS7	4.08111e-23	0.220645	0.407	0.167	1.36872e-18	22.3892	DHRS7
2022-09-10	4.0877e-23	0.232506	0.132	0.025	1.37093e-18	22.3885	2022-09-10
PTEN	4.81542e-23	0.232353	0.25	0.073	1.61499e-18	22.3174	PTEN
GPR108	5.12123e-23	0.244891	0.225	0.064	1.71756e-18	22.2906	GPR108
TGFB1	5.16837e-23	0.190693	0.379	0.148	1.73337e-18	22.2866	TGFB1
LILRB3	6.07504e-23	0.277344	0.205	0.054	2.03745e-18	22.2165	LILRB3
SRSF3	6.14018e-23	0.125455	0.666	0.374	2.05929e-18	22.2118	SRSF3
TNFRSF1B	6.62115e-23	0.292445	0.307	0.113	2.2206e-18	22.1791	TNFRSF1B
MAFF	6.62197e-23	0.343447	0.232	0.075	2.22088e-18	22.179	MAFF
TWF1	6.85403e-23	0.243314	0.149	0.028	2.2987e-18	22.1641	TWF1
LPP	6.95362e-23	0.226429	0.305	0.108	2.3321e-18	22.1578	LPP
SH2B3	7.11827e-23	0.210474	0.308	0.114	2.38733e-18	22.1476	SH2B3
SLC2A6	7.11827e-23	0.243734	0.116	0.018	2.38733e-18	22.1476	SLC2A6
COL1A2	7.35531e-23	-0.745524	0.063	0.127	2.46682e-18	22.1334	COL1A2
TLR8	7.66714e-23	0.235718	0.121	0.016	2.5714e-18	22.1154	TLR8
GSAP	8.76956e-23	0.235869	0.174	0.042	2.94113e-18	22.057	GSAP
RBM3	9.2954e-23	0.125227	0.599	0.32	3.11749e-18	22.0317	RBM3
MOB1A	9.43812e-23	0.0964122	0.543	0.256	3.16536e-18	22.0251	MOB1A
RRAGD	9.5089e-23	0.264298	0.181	0.043	3.1891e-18	22.0219	RRAGD
BST2	9.85352e-23	-0.885937	0.604	0.566	3.30467e-18	22.0064	BST2
CCDC88A	1.02342e-22	0.118363	0.52	0.251	3.43235e-18	21.9899	CCDC88A
SIDT2	1.3285e-22	0.231637	0.149	0.029	4.45552e-18	21.8766	SIDT2
RAB14	1.38123e-22	0.202872	0.335	0.124	4.63239e-18	21.8597	RAB14
SEC11A	1.41061e-22	0.144863	0.587	0.322	4.7309e-18	21.8506	SEC11A
RUNX1	1.4139e-22	0.288143	0.295	0.109	4.74192e-18	21.8496	RUNX1
RHOU	1.49824e-22	0.249759	0.119	0.018	5.0248e-18	21.8244	RHOU
VEGFB	1.51893e-22	0.24921	0.234	0.073	5.09419e-18	21.8185	VEGFB
ACSL3	1.55906e-22	0.219406	0.256	0.075	5.22879e-18	21.8071	ACSL3
BACH1	1.67379e-22	0.235957	0.226	0.062	5.61357e-18	21.7763	BACH1
UTP18	1.70039e-22	0.225521	0.214	0.057	5.70275e-18	21.7695	UTP18
ZFAS1	2.11774e-22	-0.832396	0.446	0.455	7.10246e-18	21.6741	ZFAS1
ABCA1	2.12391e-22	0.239781	0.447	0.196	7.12318e-18	21.6729	ABCA1
CDC42SE2	2.2777e-22	0.247508	0.305	0.099	7.63894e-18	21.6425	CDC42SE2
TPM3	2.41329e-22	0.0903665	0.761	0.482	8.09368e-18	21.6174	TPM3
SBNO2	2.57782e-22	0.238544	0.132	0.022	8.6455e-18	21.5887	SBNO2
ACAP2	2.62706e-22	0.219584	0.376	0.144	8.81065e-18	21.5805	ACAP2
ERH	2.75586e-22	-0.836277	0.404	0.393	9.24259e-18	21.5597	ERH
CREBRF	3.23045e-22	0.240958	0.297	0.108	1.08343e-17	21.4907	CREBRF
NDUFB1	3.43585e-22	-0.862708	0.577	0.529	1.15231e-17	21.464	NDUFB1
ZMYM2	3.64792e-22	0.278483	0.234	0.069	1.22344e-17	21.438	ZMYM2
NAA50	3.84125e-22	0.257001	0.233	0.072	1.28828e-17	21.4155	NAA50
GABARAPL1	4.07395e-22	0.352922	0.252	0.085	1.36632e-17	21.39	GABARAPL1
MTCH1	4.95345e-22	0.217553	0.366	0.146	1.66129e-17	21.3051	MTCH1
NBR1	5.14693e-22	0.250437	0.186	0.043	1.72618e-17	21.2885	NBR1
KTN1	5.22048e-22	0.112885	0.57	0.29	1.75084e-17	21.2823	KTN1
CXCL12	5.42483e-22	0.34288	0.119	0.025	1.81938e-17	21.2656	CXCL12
NECAP2	5.91138e-22	0.220831	0.36	0.135	1.98256e-17	21.2283	NECAP2
FOSL2	6.04755e-22	0.284465	0.265	0.094	2.02823e-17	21.2184	FOSL2
PPCS	6.24915e-22	0.19665	0.319	0.116	2.09584e-17	21.2042	PPCS
OSBPL1A	6.33703e-22	0.23606	0.24	0.072	2.12531e-17	21.1981	OSBPL1A
TREM1	7.19127e-22	0.315867	0.204	0.057	2.41181e-17	21.1432	TREM1
TREM2	7.92665e-22	-0.893633	0.569	0.546	2.65844e-17	21.1009	TREM2
UBL3	8.03187e-22	0.232469	0.279	0.096	2.69373e-17	21.0952	UBL3
DBNL	8.10746e-22	0.181964	0.387	0.163	2.71908e-17	21.0911	DBNL
TRIM14	8.11974e-22	0.218539	0.214	0.062	2.7232e-17	21.0905	TRIM14
IFITM2	8.37826e-22	-0.895938	0.291	0.316	2.8099e-17	21.0768	IFITM2
DNAJB14	8.46712e-22	0.223736	0.254	0.071	2.8397e-17	21.0723	DNAJB14
FRMD4B	8.91245e-22	0.174652	0.399	0.167	2.98906e-17	21.05	FRMD4B
OTOA	9.00783e-22	-0.754547	0.108	0.151	3.02104e-17	21.0454	OTOA
SRFBP1	1.01747e-21	0.203238	0.158	0.036	3.41239e-17	20.9925	SRFBP1
PPID	1.1043e-21	0.216687	0.168	0.042	3.70359e-17	20.9569	PPID
TMEM59	1.15273e-21	0.0293772	0.62	0.34	3.86603e-17	20.9383	TMEM59
TRIM47	1.16058e-21	0.244171	0.173	0.041	3.89234e-17	20.9353	TRIM47
RARRES1	1.22054e-21	0.364584	0.166	0.043	4.09344e-17	20.9134	RARRES1
FNDC3A	1.23719e-21	0.234702	0.228	0.062	4.14927e-17	20.9076	FNDC3A
TIPRL	1.26798e-21	0.204779	0.242	0.072	4.25254e-17	20.8969	TIPRL
PPP2R5E	1.27187e-21	0.209351	0.212	0.063	4.2656e-17	20.8956	PPP2R5E
NPC1	1.28594e-21	0.225627	0.182	0.043	4.31279e-17	20.8908	NPC1
JAML	1.29807e-21	0.288435	0.15	0.035	4.35348e-17	20.8867	JAML
SDC3	1.33063e-21	0.230574	0.32	0.113	4.46268e-17	20.8759	SDC3
RPL18A	1.37465e-21	-0.642382	0.962	0.912	4.6103e-17	20.8618	RPL18A
TUT7	1.39537e-21	0.269857	0.197	0.056	4.6798e-17	20.8553	TUT7
ANAPC11	1.4426e-21	-0.840142	0.45	0.427	4.83818e-17	20.8409	ANAPC11
MYO1G	1.48548e-21	0.269755	0.152	0.031	4.982e-17	20.8281	MYO1G
KCNQ1OT1	1.52055e-21	0.489226	0.186	0.055	5.09963e-17	20.818	KCNQ1OT1
PABPC4	1.64705e-21	0.189331	0.424	0.179	5.52389e-17	20.7833	PABPC4
EIF3L	1.65267e-21	0.154679	0.431	0.203	5.54273e-17	20.7818	EIF3L
HADHB	1.80871e-21	0.15896	0.321	0.119	6.06605e-17	20.7426	HADHB
KLHL6	1.84049e-21	0.254433	0.178	0.046	6.17265e-17	20.7351	KLHL6
IFRD1	1.98267e-21	0.260976	0.363	0.158	6.64947e-17	20.7028	IFRD1
NFKB1	2.20916e-21	0.301032	0.312	0.118	7.4091e-17	20.6558	NFKB1
SLC38A2	2.2687e-21	0.242952	0.41	0.18	7.60878e-17	20.6442	SLC38A2
ZNF207	2.34391e-21	0.188449	0.382	0.158	7.86101e-17	20.6301	ZNF207
SGK3	2.7576e-21	0.183849	0.287	0.095	9.24844e-17	20.5595	SGK3
PPP1CC	2.84661e-21	0.218656	0.329	0.119	9.54697e-17	20.5457	PPP1CC
TUBA1A	2.88122e-21	0.274415	0.449	0.204	9.66302e-17	20.5404	TUBA1A
MRPL23	2.92838e-21	-0.609363	0.15	0.187	9.82121e-17	20.5334	MRPL23
RAB5A	2.93725e-21	0.213736	0.265	0.085	9.85093e-17	20.5321	RAB5A
PTMA	2.9549e-21	-0.464429	0.993	0.969	9.91013e-17	20.5295	PTMA
HSPA1A	3.15968e-21	0.562386	0.798	0.631	1.05969e-16	20.5004	HSPA1A
NRIP1	3.32496e-21	0.192937	0.309	0.108	1.11513e-16	20.4782	NRIP1
HSD3B7	3.38331e-21	0.228386	0.153	0.035	1.1347e-16	20.4707	HSD3B7
WBP2	3.50293e-21	0.199198	0.293	0.101	1.17481e-16	20.4556	WBP2
TCF4	3.54239e-21	0.190222	0.452	0.208	1.18805e-16	20.4507	TCF4
KIAA1551	3.89312e-21	0.232631	0.234	0.073	1.30567e-16	20.4097	KIAA1551
AC016831.1	4.30751e-21	0.259779	0.107	0.019	1.44465e-16	20.3658	AC016831.1
DNM2	4.36583e-21	0.230332	0.222	0.062	1.46421e-16	20.3599	DNM2
PRKAR1A	4.69286e-21	0.213777	0.379	0.156	1.57389e-16	20.3286	PRKAR1A
NFAM1	5.17893e-21	0.243286	0.172	0.037	1.73691e-16	20.2858	NFAM1
PSTPIP2	5.17928e-21	0.257112	0.162	0.036	1.73703e-16	20.2857	PSTPIP2
ADAM28	5.37185e-21	0.205045	0.266	0.087	1.80161e-16	20.2699	ADAM28
RHOA	5.4443e-21	0.049563	0.841	0.607	1.82591e-16	20.2641	RHOA
DERL1	5.56526e-21	0.182621	0.273	0.089	1.86648e-16	20.2545	DERL1
BZW1	6.04246e-21	0.180281	0.389	0.161	2.02652e-16	20.2188	BZW1
2022-03-07	6.64319e-21	0.199591	0.206	0.06	2.22799e-16	20.1776	2022-03-07
GPCPD1	6.71471e-21	0.219486	0.273	0.091	2.25198e-16	20.173	GPCPD1
PUM1	6.97629e-21	0.192135	0.322	0.126	2.33971e-16	20.1564	PUM1
C5AR2	7.37258e-21	0.345041	0.101	0.018	2.47262e-16	20.1324	C5AR2
FAM111A	7.61367e-21	0.211767	0.2	0.053	2.55347e-16	20.1184	FAM111A
MINOS1	7.63374e-21	-0.836812	0.453	0.425	2.5602e-16	20.1173	MINOS1
SFPQ	8.84703e-21	0.104053	0.526	0.26	2.96712e-16	20.0532	SFPQ
SQOR	8.86908e-21	0.155302	0.43	0.181	2.97451e-16	20.0521	SQOR
MOB1B	9.14833e-21	0.249958	0.188	0.053	3.06817e-16	20.0387	MOB1B
FUCA2	9.17302e-21	0.20873	0.306	0.111	3.07645e-16	20.0375	FUCA2
MX1	9.3525e-21	-0.83506	0.249	0.281	3.13664e-16	20.0291	MX1
EHBP1L1	9.65989e-21	0.201405	0.286	0.098	3.23973e-16	20.015	EHBP1L1
MITF	9.69964e-21	0.24711	0.228	0.071	3.25306e-16	20.0132	MITF
CREM	9.78294e-21	0.214786	0.332	0.13	3.281e-16	20.0095	CREM
FLVCR2	9.80945e-21	0.179933	0.138	0.027	3.28989e-16	20.0084	FLVCR2
VCP	9.90602e-21	0.149192	0.358	0.134	3.32228e-16	20.0041	VCP
SLC43A3	9.90779e-21	0.173551	0.345	0.137	3.32287e-16	20.004	SLC43A3
ACTN1	1.02557e-20	0.158946	0.373	0.147	3.43956e-16	19.989	ACTN1
CCNDBP1	1.13533e-20	0.210854	0.246	0.076	3.80765e-16	19.9449	CCNDBP1
TUBA1C	1.15438e-20	0.122225	0.483	0.227	3.87155e-16	19.9377	TUBA1C
BAZ1A	1.1665e-20	0.19764	0.349	0.135	3.91222e-16	19.9331	BAZ1A
SLC39A1	1.21273e-20	0.20218	0.296	0.105	4.06724e-16	19.9162	SLC39A1
RPS4X	1.23473e-20	-0.591803	0.973	0.93	4.14105e-16	19.9084	RPS4X
MYO1E	1.30939e-20	0.230244	0.179	0.04	4.39142e-16	19.8829	MYO1E
PTGER4	1.36889e-20	0.244977	0.251	0.08	4.59097e-16	19.8636	PTGER4
ATP2C1	1.38491e-20	0.203747	0.277	0.098	4.64473e-16	19.8586	ATP2C1
SECTM1	1.44069e-20	0.253505	0.159	0.03	4.83177e-16	19.8414	SECTM1
VDAC2	1.44536e-20	0.120337	0.433	0.198	4.84744e-16	19.84	VDAC2
BBX	1.54957e-20	0.17424	0.303	0.112	5.19693e-16	19.8098	BBX
TMX4	1.56952e-20	0.25318	0.189	0.052	5.26386e-16	19.8042	TMX4
FADS1	1.57793e-20	0.237189	0.142	0.03	5.29207e-16	19.8019	FADS1
TSNAX	1.73757e-20	0.215296	0.228	0.07	5.82747e-16	19.7601	TSNAX
TBC1D15	1.81879e-20	0.181825	0.178	0.048	6.09987e-16	19.7402	TBC1D15
TPR	1.8287e-20	0.18596	0.301	0.109	6.1331e-16	19.7379	TPR
SLC25A36	1.85241e-20	0.200832	0.226	0.07	6.2126e-16	19.7323	SLC25A36
PIGT	1.97509e-20	0.203245	0.295	0.102	6.62407e-16	19.7044	PIGT
SEC63	1.97723e-20	0.17375	0.255	0.087	6.63124e-16	19.7039	SEC63
NAP1L1	1.9995e-20	0.0729723	0.688	0.407	6.70594e-16	19.6991	NAP1L1
SECISBP2	2.02915e-20	0.220496	0.169	0.041	6.80538e-16	19.6927	SECISBP2
TLR5	2.07247e-20	0.245441	0.132	0.028	6.95063e-16	19.6835	TLR5
ABHD2	2.0975e-20	0.239678	0.263	0.081	7.03458e-16	19.6783	ABHD2
RNF144B	2.21456e-20	0.303127	0.221	0.065	7.42719e-16	19.6547	RNF144B
USP15	2.30633e-20	0.201268	0.267	0.084	7.73497e-16	19.6371	USP15
CYLD	2.32025e-20	0.218777	0.253	0.075	7.78165e-16	19.6345	CYLD
DDX17	2.36148e-20	0.135494	0.561	0.286	7.91993e-16	19.6268	DDX17
SLC25A44	2.49338e-20	0.20526	0.119	0.018	8.36229e-16	19.6032	SLC25A44
SIRPA	2.53585e-20	0.135295	0.396	0.169	8.50474e-16	19.5959	SIRPA
TMED5	2.59145e-20	0.163003	0.256	0.083	8.69122e-16	19.5865	TMED5
ORMDL1	2.74188e-20	0.21428	0.268	0.092	9.19571e-16	19.562	ORMDL1
USP33	2.75561e-20	0.207346	0.19	0.048	9.24177e-16	19.5598	USP33
RUFY3	2.87424e-20	0.227684	0.18	0.042	9.63963e-16	19.5415	RUFY3
LYN	3.06625e-20	0.15199	0.484	0.217	1.02836e-15	19.5134	LYN
HSPB1	3.27411e-20	-0.732754	0.744	0.713	1.09807e-15	19.4849	HSPB1
KDSR	3.40313e-20	0.215212	0.218	0.071	1.14134e-15	19.4681	KDSR
ARID1B	3.52095e-20	0.132369	0.327	0.131	1.18086e-15	19.4533	ARID1B
PBRM1	3.79753e-20	0.18247	0.276	0.096	1.27361e-15	19.4205	PBRM1
PQLC1	3.89224e-20	0.233736	0.19	0.05	1.30538e-15	19.4098	PQLC1
AFF1	4.11465e-20	0.23421	0.159	0.039	1.37997e-15	19.3857	AFF1
MIS18BP1	4.46442e-20	0.215576	0.228	0.073	1.49728e-15	19.3502	MIS18BP1
PPP3CA	4.58333e-20	0.239289	0.202	0.06	1.53716e-15	19.3388	PPP3CA
NDRG1	4.72341e-20	0.275272	0.213	0.066	1.58414e-15	19.3257	NDRG1
PCMTD1	4.82275e-20	0.216809	0.215	0.065	1.61745e-15	19.3167	PCMTD1
USF2	4.85285e-20	0.17522	0.417	0.17	1.62755e-15	19.314	USF2
EIF5A	4.86491e-20	0.0734158	0.506	0.251	1.63159e-15	19.3129	EIF5A
CEMIP2	4.87763e-20	0.248404	0.101	0.017	1.63586e-15	19.3118	CEMIP2
TAOK1	5.32544e-20	0.189555	0.303	0.105	1.78605e-15	19.2736	TAOK1
RAB13	5.33025e-20	0.141147	0.38	0.167	1.78766e-15	19.2733	RAB13
ST3GAL1	6.3223e-20	0.206596	0.199	0.058	2.12037e-15	19.1991	ST3GAL1
ABHD12	7.15912e-20	0.143083	0.387	0.161	2.40103e-15	19.1451	ABHD12
TUBGCP2	7.26422e-20	0.186624	0.272	0.1	2.43627e-15	19.1388	TUBGCP2
CIR1	7.42671e-20	0.207644	0.336	0.123	2.49077e-15	19.1292	CIR1
FKBP15	7.5938e-20	0.17973	0.283	0.096	2.54681e-15	19.1195	FKBP15
CAPNS1	7.63635e-20	0.140108	0.451	0.204	2.56108e-15	19.1171	CAPNS1
EP300	7.8867e-20	0.202755	0.186	0.055	2.64504e-15	19.1031	EP300
N4BP1	7.93553e-20	0.193776	0.188	0.048	2.66142e-15	19.1004	N4BP1
USP48	8.50633e-20	0.171023	0.156	0.04	2.85285e-15	19.0703	USP48
SOAT1	9.35799e-20	0.207532	0.362	0.142	3.13848e-15	19.0288	SOAT1
FBXL3	9.92948e-20	0.188374	0.147	0.037	3.33015e-15	19.0031	FBXL3
ERP44	9.97324e-20	0.143273	0.347	0.139	3.34482e-15	19.0012	ERP44
COL1A1	1.04884e-19	-0.849847	0.066	0.118	3.5176e-15	18.9793	COL1A1
ARID4A	1.09302e-19	0.195469	0.225	0.071	3.66576e-15	18.9614	ARID4A
NIN	1.15368e-19	0.207289	0.189	0.055	3.86921e-15	18.9379	NIN
SAMHD1	1.21896e-19	0.0471493	0.6	0.331	4.08815e-15	18.914	SAMHD1
DARS	1.24375e-19	0.184722	0.357	0.144	4.17127e-15	18.9053	DARS
ST13	1.27228e-19	0.0837198	0.533	0.271	4.26699e-15	18.8954	ST13
SMCO4	1.41679e-19	0.187939	0.359	0.149	4.75165e-15	18.8487	SMCO4
ATG7	1.44527e-19	0.243789	0.209	0.058	4.84713e-15	18.8401	ATG7
KLF10	1.45725e-19	0.266691	0.262	0.091	4.88732e-15	18.8365	KLF10
IMMT	1.47266e-19	0.184147	0.253	0.082	4.93899e-15	18.8319	IMMT
THUMPD1	1.4832e-19	0.168498	0.215	0.066	4.97436e-15	18.8288	THUMPD1
SGTB	1.51645e-19	0.197023	0.13	0.027	5.08586e-15	18.8192	SGTB
CHD1	1.56807e-19	0.263629	0.235	0.076	5.25899e-15	18.8046	CHD1
RNASEH2B	1.58341e-19	0.173606	0.319	0.12	5.31043e-15	18.8004	RNASEH2B
RCN1	1.60063e-19	0.18115	0.185	0.043	5.3682e-15	18.7957	RCN1
MKNK2	1.60933e-19	0.262796	0.216	0.066	5.39736e-15	18.7934	MKNK2
TMEM51	1.63614e-19	0.215569	0.306	0.109	5.48727e-15	18.7862	TMEM51
ABHD5	1.74608e-19	0.285348	0.221	0.069	5.85601e-15	18.7579	ABHD5
MX2	1.79975e-19	-0.694996	0.131	0.172	6.036e-15	18.7448	MX2
COMMD6	1.8472e-19	-0.798902	0.556	0.514	6.19514e-15	18.7335	COMMD6
DIAPH2	2.01456e-19	0.229377	0.139	0.027	6.75642e-15	18.6958	DIAPH2
ACO1	2.05056e-19	0.207308	0.134	0.026	6.87715e-15	18.6881	ACO1
MAP3K8	2.10808e-19	0.218567	0.265	0.101	7.07009e-15	18.6761	MAP3K8
SLC3A2	2.16124e-19	0.123425	0.417	0.181	7.24836e-15	18.6653	SLC3A2
ARID4B	2.20806e-19	0.130831	0.319	0.117	7.40541e-15	18.656	ARID4B
SEC31A	2.29723e-19	0.184763	0.298	0.1	7.70447e-15	18.6388	SEC31A
CYBC1	2.34691e-19	0.200187	0.298	0.117	7.87105e-15	18.6295	CYBC1
DOCK11	2.64624e-19	0.203644	0.144	0.033	8.87497e-15	18.5774	DOCK11
RALA	2.69894e-19	0.143732	0.36	0.144	9.05169e-15	18.5688	RALA
COPB1	2.83675e-19	0.228958	0.274	0.09	9.5139e-15	18.5472	COPB1
GPR137B	3.03898e-19	0.176476	0.31	0.11	1.01921e-14	18.5173	GPR137B
EFR3A	3.07408e-19	0.170571	0.318	0.118	1.03098e-14	18.5123	EFR3A
KIAA1109	3.09298e-19	0.211072	0.17	0.041	1.03732e-14	18.5096	KIAA1109
AFF4	3.18004e-19	0.228729	0.302	0.116	1.06652e-14	18.4976	AFF4
TMEM230	3.34534e-19	0.0863978	0.442	0.205	1.12196e-14	18.4756	TMEM230
RIOK3	3.47905e-19	0.187066	0.22	0.07	1.1668e-14	18.4585	RIOK3
NT5C3A	3.50767e-19	-0.791658	0.124	0.15	1.1764e-14	18.455	NT5C3A
SWAP70	3.55446e-19	0.199168	0.324	0.123	1.1921e-14	18.4492	SWAP70
THOC7	3.60297e-19	0.121602	0.302	0.112	1.20836e-14	18.4433	THOC7
TRAPPC1	3.60347e-19	-0.783152	0.37	0.358	1.20853e-14	18.4433	TRAPPC1
RMDN3	3.71538e-19	0.221511	0.265	0.096	1.24606e-14	18.43	RMDN3
DNAJC13	3.82293e-19	0.173404	0.162	0.037	1.28214e-14	18.4176	DNAJC13
ECHDC1	3.93099e-19	0.198778	0.22	0.069	1.31838e-14	18.4055	ECHDC1
CREG1	3.93529e-19	0.0460682	0.561	0.291	1.31982e-14	18.405	CREG1
EMC2	4.01816e-19	0.186848	0.162	0.037	1.34761e-14	18.396	EMC2
CCNC	4.12655e-19	0.178126	0.159	0.038	1.38396e-14	18.3844	CCNC
ECPAS	4.32411e-19	0.209139	0.149	0.031	1.45022e-14	18.3641	ECPAS
GRASP	4.61158e-19	0.295083	0.125	0.028	1.54663e-14	18.3362	GRASP
TANK	4.66937e-19	0.210284	0.27	0.097	1.56601e-14	18.3307	TANK
PCNX1	4.73572e-19	0.200092	0.135	0.029	1.58827e-14	18.3246	PCNX1
RAPGEF1	5.16007e-19	0.189921	0.248	0.083	1.73059e-14	18.2873	RAPGEF1
PSMA7	5.41405e-19	-0.808966	0.759	0.686	1.81576e-14	18.2665	PSMA7
DDX6	5.43045e-19	0.209348	0.235	0.081	1.82126e-14	18.2652	DDX6
CPEB4	5.57987e-19	0.240403	0.316	0.123	1.87138e-14	18.2534	CPEB4
SLU7	6.48602e-19	0.198201	0.199	0.06	2.17528e-14	18.188	SLU7
EZR	6.73686e-19	0.255305	0.34	0.145	2.25941e-14	18.1715	EZR
SECISBP2L	6.7778e-19	0.225066	0.142	0.032	2.27314e-14	18.1689	SECISBP2L
HEBP1	6.77982e-19	0.18742	0.263	0.087	2.27382e-14	18.1688	HEBP1
IGHG4	6.81838e-19	0.924105	0.138	0.03	2.28675e-14	18.1663	IGHG4
FAM49A	7.00007e-19	0.215311	0.202	0.06	2.34768e-14	18.1549	FAM49A
LRRK2	7.0732e-19	0.189243	0.129	0.024	2.37221e-14	18.1504	LRRK2
SNW1	7.28509e-19	0.176223	0.275	0.094	2.44327e-14	18.1376	SNW1
MYH9	7.65025e-19	0.170575	0.442	0.202	2.56574e-14	18.1163	MYH9
CHD4	7.80147e-19	0.154732	0.335	0.135	2.61646e-14	18.1078	CHD4
UQCRC2	8.17073e-19	0.136388	0.353	0.15	2.7403e-14	18.0877	UQCRC2
GAB3	8.19623e-19	0.204174	0.142	0.031	2.74885e-14	18.0864	GAB3
DDHD1	8.36918e-19	0.217818	0.184	0.046	2.80685e-14	18.0773	DDHD1
COPS2	8.59292e-19	0.206575	0.196	0.055	2.88189e-14	18.0659	COPS2
DENND4A	9.18036e-19	0.200233	0.106	0.02	3.07891e-14	18.0371	DENND4A
DCTN2	9.33106e-19	0.190267	0.262	0.094	3.12945e-14	18.0301	DCTN2
RPS10	9.40243e-19	-0.725847	0.608	0.573	3.15339e-14	18.0268	RPS10
TNFRSF1A	9.89325e-19	0.154014	0.419	0.183	3.318e-14	18.0047	TNFRSF1A
PPIA	9.92086e-19	-0.748463	0.821	0.745	3.32726e-14	18.0035	PPIA
IL18	1.02375e-18	0.212783	0.408	0.199	3.43346e-14	17.9898	IL18
KIF1B	1.05661e-18	0.226055	0.171	0.045	3.54365e-14	17.9761	KIF1B
EEF2	1.10204e-18	0.00214924	0.681	0.395	3.69603e-14	17.9578	EEF2
ADAM8	1.10349e-18	0.194005	0.309	0.12	3.70089e-14	17.9572	ADAM8
VDAC3	1.1489e-18	0.144987	0.299	0.119	3.85318e-14	17.9397	VDAC3
ALPK1	1.14898e-18	0.181471	0.125	0.025	3.85344e-14	17.9397	ALPK1
KCMF1	1.19192e-18	0.185337	0.141	0.032	3.99744e-14	17.9238	KCMF1
GPR65	1.26733e-18	0.111867	0.376	0.149	4.25037e-14	17.8971	GPR65
IGSF21	1.37616e-18	0.289238	0.153	0.043	4.61536e-14	17.8613	IGSF21
PFKP	1.37958e-18	0.202776	0.146	0.029	4.62684e-14	17.8603	PFKP
SRP72	1.40813e-18	0.160733	0.355	0.141	4.72259e-14	17.8514	SRP72
SLC29A3	1.45863e-18	0.182945	0.213	0.067	4.89195e-14	17.8361	SLC29A3
KMT2E	1.48408e-18	0.153275	0.368	0.159	4.97732e-14	17.8285	KMT2E
ILK	1.49999e-18	0.200488	0.293	0.113	5.03068e-14	17.8239	ILK
MAFB	1.51217e-18	0.208972	0.763	0.517	5.07152e-14	17.8204	MAFB
CNOT2	1.52753e-18	0.200541	0.256	0.086	5.12304e-14	17.816	CNOT2
FNTA	1.53915e-18	0.209997	0.234	0.078	5.16199e-14	17.8127	FNTA
RASSF2	1.73696e-18	0.169489	0.244	0.085	5.82542e-14	17.7602	RASSF2
GLS	1.8139e-18	0.190395	0.344	0.15	6.08346e-14	17.7414	GLS
HDLBP	1.86221e-18	0.152849	0.315	0.126	6.24547e-14	17.73	HDLBP
IL6ST	1.88639e-18	0.138199	0.255	0.092	6.32658e-14	17.7244	IL6ST
RPL30	1.90499e-18	0.0534877	0.963	0.822	6.38894e-14	17.7201	RPL30
ITSN2	1.96778e-18	0.19512	0.279	0.101	6.59954e-14	17.706	ITSN2
ZNF638	2.04816e-18	0.205462	0.227	0.069	6.86914e-14	17.6886	ZNF638
2022-09-02	2.12726e-18	0.123458	0.416	0.184	7.13441e-14	17.6722	2022-09-02
HPS5	2.20859e-18	0.195654	0.179	0.048	7.40718e-14	17.6559	HPS5
UBE2R2	2.37947e-18	0.137241	0.292	0.111	7.98027e-14	17.6235	UBE2R2
HTRA1	2.47414e-18	-0.754372	0.216	0.272	8.29776e-14	17.6066	HTRA1
ZNF267	2.57938e-18	0.181781	0.212	0.06	8.65071e-14	17.5885	ZNF267
YY1	2.63729e-18	0.147164	0.375	0.15	8.84494e-14	17.5788	YY1
CSF2RB	2.64048e-18	0.21114	0.173	0.041	8.85566e-14	17.5783	CSF2RB
NFE2L3	2.74159e-18	0.177493	0.122	0.021	9.19474e-14	17.562	NFE2L3
ZNF385A	2.82228e-18	0.195794	0.268	0.094	9.46536e-14	17.5494	ZNF385A
GDE1	2.84705e-18	0.1935	0.216	0.068	9.54844e-14	17.5456	GDE1
PSMD6	2.93721e-18	0.181328	0.227	0.067	9.85083e-14	17.5321	PSMD6
GTF3A	2.96343e-18	0.124676	0.431	0.197	9.93875e-14	17.5282	GTF3A
ATP6V1A	2.97373e-18	0.156157	0.377	0.16	9.97331e-14	17.5267	ATP6V1A
SPART	3.02788e-18	0.172124	0.189	0.051	1.01549e-13	17.5189	SPART
ERGIC2	3.04113e-18	0.150631	0.204	0.065	1.01993e-13	17.517	ERGIC2
SELENOS	3.16881e-18	0.0869234	0.496	0.246	1.06276e-13	17.4991	SELENOS
ABCG1	3.27545e-18	0.198168	0.26	0.089	1.09852e-13	17.4847	ABCG1
EIF4A2	3.33547e-18	0.044614	0.555	0.284	1.11865e-13	17.4768	EIF4A2
METTL7A	3.54257e-18	0.233506	0.231	0.083	1.18811e-13	17.4507	METTL7A
IKBKB	3.67877e-18	0.211777	0.157	0.04	1.23379e-13	17.4343	IKBKB
USO1	3.78823e-18	0.179814	0.229	0.073	1.2705e-13	17.4216	USO1
CD37	4.05274e-18	0.0955568	0.594	0.318	1.35921e-13	17.3923	CD37
RPS7	4.3595e-18	-0.64886	0.857	0.792	1.46209e-13	17.3606	RPS7
EVA1B	4.60366e-18	0.182001	0.218	0.064	1.54398e-13	17.3369	EVA1B
DNAJC7	4.70358e-18	0.117951	0.35	0.143	1.57749e-13	17.3276	DNAJC7
EML4	4.81547e-18	0.16258	0.36	0.141	1.61501e-13	17.3174	EML4
BTG2	5.26352e-18	0.237417	0.43	0.22	1.76528e-13	17.2787	BTG2
CHML	5.27906e-18	0.234574	0.103	0.021	1.77049e-13	17.2774	CHML
ADCY7	5.67347e-18	0.154042	0.246	0.085	1.90277e-13	17.2462	ADCY7
CRYBG1	5.76951e-18	0.190594	0.169	0.042	1.93498e-13	17.2389	CRYBG1
BCL3	6.03076e-18	0.227103	0.118	0.023	2.0226e-13	17.2196	BCL3
ESCO1	6.15745e-18	0.181267	0.104	0.019	2.06509e-13	17.2106	ESCO1
ADAM9	6.5133e-18	0.227016	0.262	0.09	2.18443e-13	17.1862	ADAM9
SLC5A3	6.81117e-18	0.279734	0.21	0.067	2.28433e-13	17.1668	SLC5A3
NFATC2	6.83048e-18	0.248556	0.173	0.051	2.29081e-13	17.1655	NFATC2
MMP9	7.00641e-18	0.384329	0.319	0.14	2.34981e-13	17.1545	MMP9
GINM1	7.40212e-18	0.19306	0.206	0.064	2.48252e-13	17.1306	GINM1
U2SURP	7.42089e-18	0.17562	0.325	0.119	2.48882e-13	17.1295	U2SURP
LGALS8	7.72388e-18	0.190132	0.183	0.051	2.59043e-13	17.1122	LGALS8
S100A8	8.16817e-18	0.501036	0.225	0.089	2.73944e-13	17.0879	S100A8
SNAP23	8.29711e-18	0.18394	0.24	0.081	2.78268e-13	17.0811	SNAP23
KPNA4	8.74436e-18	0.19952	0.26	0.096	2.93268e-13	17.0583	KPNA4
AGTRAP	8.80141e-18	0.167358	0.301	0.114	2.95182e-13	17.0554	AGTRAP
SND1	9.07106e-18	0.150938	0.209	0.067	3.04225e-13	17.0423	SND1
RAB7A	1.03319e-17	0.0104679	0.577	0.313	3.46511e-13	16.9858	RAB7A
PGRMC1	1.04786e-17	0.179883	0.185	0.056	3.51432e-13	16.9797	PGRMC1
DOCK2	1.15543e-17	0.177678	0.31	0.114	3.87508e-13	16.9373	DOCK2
EIF1B	1.15922e-17	0.144088	0.379	0.156	3.88781e-13	16.9358	EIF1B
SCOC	1.20016e-17	0.200123	0.205	0.061	4.02511e-13	16.9208	SCOC
SUGT1	1.23886e-17	0.145164	0.248	0.086	4.15487e-13	16.907	SUGT1
EMILIN2	1.27812e-17	0.175211	0.26	0.087	4.28658e-13	16.8934	EMILIN2
KPNA3	1.4712e-17	0.151747	0.226	0.072	4.93412e-13	16.8323	KPNA3
MAGT1	1.50461e-17	0.167787	0.249	0.087	5.04616e-13	16.8226	MAGT1
CHD9	1.54578e-17	0.12797	0.375	0.158	5.18424e-13	16.8109	CHD9
APPL1	1.61544e-17	0.161958	0.345	0.137	5.41786e-13	16.7917	APPL1
JMY	1.67521e-17	0.205335	0.115	0.025	5.61831e-13	16.7759	JMY
FNBP1	1.77121e-17	0.198178	0.352	0.144	5.94027e-13	16.7517	FNBP1
RPL28	1.85171e-17	-0.34728	0.991	0.981	6.21026e-13	16.7324	RPL28
EPAS1	1.92986e-17	0.201441	0.135	0.031	6.47235e-13	16.7145	EPAS1
RPL11	1.96609e-17	-0.491861	0.976	0.938	6.59389e-13	16.7064	RPL11
NDUFB9	1.99937e-17	-0.753005	0.36	0.348	6.70547e-13	16.6991	NDUFB9
GATM	2.04901e-17	0.25352	0.239	0.096	6.87196e-13	16.6885	GATM
THOC2	2.10074e-17	0.166413	0.266	0.09	7.04545e-13	16.6776	THOC2
ZC3HAV1	2.12386e-17	0.260795	0.298	0.112	7.12301e-13	16.6729	ZC3HAV1
UBE2V2	2.19239e-17	0.150485	0.241	0.082	7.35283e-13	16.6591	UBE2V2
CRBN	2.22081e-17	0.173814	0.2	0.053	7.44817e-13	16.6535	CRBN
PHKB	2.3288e-17	0.171188	0.212	0.069	7.81033e-13	16.6329	PHKB
PSMC6	2.39058e-17	0.135272	0.279	0.1	8.01754e-13	16.6215	PSMC6
SGMS1	2.44999e-17	0.204435	0.148	0.039	8.21676e-13	16.6108	SGMS1
C9orf72	2.484e-17	0.218402	0.168	0.044	8.33083e-13	16.6048	C9orf72
SP100	2.49037e-17	0.0984143	0.397	0.173	8.35221e-13	16.6037	SP100
COMMD8	2.61891e-17	0.178508	0.179	0.056	8.78331e-13	16.5819	COMMD8
ARHGAP5	2.63445e-17	0.212885	0.153	0.044	8.83542e-13	16.5793	ARHGAP5
ATF6	2.63574e-17	0.184291	0.249	0.083	8.83975e-13	16.5791	ATF6
RASAL2	2.65639e-17	0.228844	0.171	0.053	8.909e-13	16.5757	RASAL2
FBXW5	2.6965e-17	0.163487	0.305	0.116	9.04353e-13	16.5692	FBXW5
KHDRBS1	2.77638e-17	0.107645	0.376	0.156	9.31141e-13	16.5565	KHDRBS1
PIK3IP1	2.82605e-17	0.2473	0.188	0.057	9.47802e-13	16.5488	PIK3IP1
IGF1	3.13382e-17	0.35535	0.137	0.043	1.05102e-12	16.5039	IGF1
NCOR1	3.19805e-17	0.190987	0.28	0.096	1.07256e-12	16.4951	NCOR1
OAS1	3.22063e-17	-0.866161	0.225	0.223	1.08014e-12	16.4921	OAS1
APOL2	3.94111e-17	0.165767	0.155	0.036	1.32177e-12	16.4044	APOL2
CCL18	4.13082e-17	0.716395	0.189	0.066	1.3854e-12	16.384	CCL18
LTN1	4.24606e-17	0.179338	0.132	0.029	1.42404e-12	16.372	LTN1
CMTM6	4.30802e-17	0.0842379	0.559	0.297	1.44482e-12	16.3657	CMTM6
BNIP3	4.35513e-17	0.236124	0.193	0.061	1.46062e-12	16.361	BNIP3
CCL8	4.67899e-17	-1.6827	0.109	0.134	1.56924e-12	16.3298	CCL8
CKS1B	4.9361e-17	-0.563413	0.093	0.125	1.65547e-12	16.3066	CKS1B
RELB	5.00459e-17	0.20377	0.146	0.039	1.67844e-12	16.3006	RELB
TPP2	5.00824e-17	0.192236	0.163	0.046	1.67966e-12	16.3003	TPP2
RGL1	5.11348e-17	0.177735	0.172	0.05	1.71496e-12	16.2913	RGL1
RPL22	5.13925e-17	-0.0519515	0.921	0.722	1.7236e-12	16.2891	RPL22
POLR2A	5.42337e-17	0.180373	0.223	0.078	1.81889e-12	16.2657	POLR2A
CORO1A	5.51408e-17	-0.779732	0.36	0.368	1.84931e-12	16.2585	CORO1A
CELF2	5.55326e-17	0.126227	0.429	0.202	1.86245e-12	16.2555	CELF2
IL2RG	5.62852e-17	0.174906	0.235	0.073	1.88769e-12	16.2496	IL2RG
KDM7A	6.33329e-17	0.162677	0.145	0.04	2.12406e-12	16.1984	KDM7A
GPX4	6.67543e-17	-0.00980087	0.871	0.65	2.23881e-12	16.1755	GPX4
DPYD	6.68119e-17	0.137111	0.235	0.075	2.24074e-12	16.1751	DPYD
TGOLN2	6.72944e-17	0.0683242	0.503	0.248	2.25692e-12	16.172	TGOLN2
OTULINL	6.9592e-17	0.13777	0.305	0.121	2.33398e-12	16.1574	OTULINL
CAPN2	7.05891e-17	0.18867	0.178	0.047	2.36742e-12	16.1513	CAPN2
SYK	7.26047e-17	0.167663	0.29	0.115	2.43502e-12	16.139	SYK
SASH1	7.41293e-17	0.196697	0.146	0.035	2.48615e-12	16.13	SASH1
CLEC12A	7.82175e-17	0.188915	0.121	0.026	2.62326e-12	16.1067	CLEC12A
RAB18	7.89159e-17	0.153793	0.305	0.112	2.64668e-12	16.1028	RAB18
TMF1	7.96154e-17	0.194844	0.18	0.054	2.67014e-12	16.099	TMF1
RNF115	7.97127e-17	0.195786	0.207	0.064	2.6734e-12	16.0985	RNF115
PLEKHB2	8.4136e-17	0.0816687	0.433	0.196	2.82175e-12	16.075	PLEKHB2
CDKN1B	8.68601e-17	0.210591	0.156	0.038	2.91311e-12	16.0612	CDKN1B
PNISR	8.92464e-17	0.120571	0.448	0.226	2.99315e-12	16.0494	PNISR
SPAG9	8.95797e-17	0.169733	0.28	0.108	3.00432e-12	16.0478	SPAG9
REST	9.09013e-17	0.184117	0.19	0.055	3.04865e-12	16.0414	REST
KLF7	9.19854e-17	0.219549	0.138	0.032	3.08501e-12	16.0363	KLF7
DCP2	1.01039e-16	0.157767	0.192	0.06	3.38865e-12	15.9955	DCP2
GPI	1.01203e-16	0.167912	0.275	0.097	3.39415e-12	15.9948	GPI
PSME4	1.01713e-16	0.173944	0.218	0.072	3.41126e-12	15.9926	PSME4
SLC43A2	1.03762e-16	0.153634	0.277	0.108	3.47997e-12	15.984	SLC43A2
DSTN	1.06898e-16	0.110867	0.493	0.241	3.58515e-12	15.971	DSTN
PTAFR	1.08507e-16	0.141634	0.283	0.105	3.63911e-12	15.9645	PTAFR
SERINC3	1.08854e-16	0.161903	0.294	0.109	3.65075e-12	15.9632	SERINC3
KDM6B	1.09518e-16	0.255394	0.318	0.137	3.673e-12	15.9605	KDM6B
HSPA4	1.11997e-16	0.167127	0.205	0.064	3.75615e-12	15.9508	HSPA4
PLIN3	1.18388e-16	0.138272	0.276	0.107	3.97051e-12	15.9267	PLIN3
P2RX7	1.20313e-16	0.187491	0.234	0.08	4.03507e-12	15.9197	P2RX7
DCAF7	1.25676e-16	0.161278	0.256	0.093	4.21491e-12	15.9007	DCAF7
SBNO1	1.33752e-16	0.166455	0.17	0.046	4.48579e-12	15.8737	SBNO1
NPM1	1.3445e-16	0.0183314	0.695	0.418	4.50918e-12	15.8714	NPM1
SFT2D1	1.35444e-16	-0.668588	0.289	0.288	4.54251e-12	15.8682	SFT2D1
PDIA6	1.38525e-16	0.0774304	0.543	0.293	4.64585e-12	15.8585	PDIA6
CDV3	1.45975e-16	0.130812	0.29	0.12	4.8957e-12	15.8357	CDV3
ANOS1	1.4888e-16	0.199682	0.148	0.032	4.99315e-12	15.8272	ANOS1
ATL3	1.53512e-16	0.168029	0.215	0.071	5.1485e-12	15.8139	ATL3
VAMP5	1.53765e-16	0.0578392	0.405	0.182	5.15699e-12	15.8131	VAMP5
ARSA	1.54776e-16	0.165438	0.186	0.057	5.19088e-12	15.8103	ARSA
NFKBIE	1.61687e-16	0.183221	0.252	0.087	5.42267e-12	15.7913	NFKBIE
MNDA	1.62855e-16	0.0128795	0.599	0.334	5.46185e-12	15.7882	MNDA
DGAT1	1.69576e-16	0.159494	0.131	0.031	5.68723e-12	15.7706	DGAT1
ARHGAP4	1.72424e-16	0.193447	0.26	0.09	5.78274e-12	15.7634	ARHGAP4
IFIT2	1.80191e-16	-0.8066	0.131	0.158	6.04326e-12	15.7443	IFIT2
TMIGD3	1.90397e-16	0.278038	0.206	0.075	6.38553e-12	15.7203	TMIGD3
ARL8B	1.91843e-16	0.112799	0.369	0.16	6.43404e-12	15.7171	ARL8B
CCDC47	1.93686e-16	0.13746	0.245	0.085	6.49583e-12	15.7129	CCDC47
TRIP12	2.05794e-16	0.12091	0.249	0.084	6.90193e-12	15.6866	TRIP12
SMDT1	2.12301e-16	-0.694929	0.291	0.287	7.12014e-12	15.673	SMDT1
ST6GAL1	2.1277e-16	0.20341	0.169	0.053	7.13589e-12	15.6721	ST6GAL1
PRPS2	2.17712e-16	0.182711	0.137	0.033	7.30163e-12	15.6621	PRPS2
DENND1B	2.17768e-16	0.176942	0.192	0.066	7.30349e-12	15.662	DENND1B
PTPN18	2.2014e-16	0.182005	0.253	0.092	7.38305e-12	15.6573	PTPN18
UBE4A	2.20167e-16	0.192737	0.152	0.041	7.38398e-12	15.6572	UBE4A
ADIPOR1	2.34632e-16	0.161263	0.266	0.098	7.8691e-12	15.6296	ADIPOR1
COLEC12	2.3678e-16	0.23613	0.167	0.049	7.94112e-12	15.6257	COLEC12
ZFHX3	2.45697e-16	0.16525	0.366	0.165	8.24018e-12	15.6096	ZFHX3
ASH1L	2.51105e-16	0.178814	0.262	0.095	8.42155e-12	15.6001	ASH1L
ATP6V0D1	2.58266e-16	0.0667376	0.476	0.233	8.66173e-12	15.5879	ATP6V0D1
RSF1	2.69848e-16	0.157258	0.275	0.103	9.05016e-12	15.5689	RSF1
MED13L	2.7228e-16	0.200092	0.196	0.066	9.13173e-12	15.565	MED13L
HERC1	2.76983e-16	0.181541	0.192	0.061	9.28944e-12	15.5575	HERC1
SURF4	2.80779e-16	0.186775	0.273	0.097	9.41677e-12	15.5516	SURF4
IFIT3	2.82168e-16	-0.874499	0.214	0.22	9.46336e-12	15.5495	IFIT3
BAG3	2.83251e-16	0.336407	0.154	0.048	9.49968e-12	15.5478	BAG3
ST8SIA4	2.8632e-16	0.154766	0.262	0.094	9.60259e-12	15.5431	ST8SIA4
KLHL24	3.12967e-16	0.184866	0.185	0.056	1.04963e-11	15.5045	KLHL24
PSMC2	3.14009e-16	0.135946	0.289	0.112	1.05312e-11	15.5031	PSMC2
BCL2A1	3.15076e-16	0.202378	0.358	0.169	1.0567e-11	15.5016	BCL2A1
MTSS1	3.21619e-16	0.249107	0.19	0.062	1.07864e-11	15.4927	MTSS1
HECTD1	3.28124e-16	0.149986	0.209	0.067	1.10046e-11	15.484	HECTD1
ATP5F1A	3.38092e-16	0.0734208	0.487	0.247	1.13389e-11	15.471	ATP5F1A
WASHC2A	3.71305e-16	0.175318	0.143	0.034	1.24528e-11	15.4303	WASHC2A
DCUN1D1	3.71812e-16	0.165084	0.196	0.056	1.24698e-11	15.4297	DCUN1D1
ATP6V1D	3.73748e-16	0.144865	0.276	0.101	1.25347e-11	15.4274	ATP6V1D
PTGES2	3.8397e-16	0.111301	0.209	0.068	1.28776e-11	15.4157	PTGES2
SPI1	4.08107e-16	0.0204137	0.678	0.398	1.36871e-11	15.3892	SPI1
SLC31A1	4.10206e-16	0.117262	0.252	0.085	1.37575e-11	15.387	SLC31A1
G3BP2	4.18702e-16	0.164508	0.248	0.092	1.40424e-11	15.3781	G3BP2
ARF1	4.20156e-16	0.0361978	0.542	0.279	1.40912e-11	15.3766	ARF1
ZYX	4.26744e-16	0.045212	0.483	0.225	1.43121e-11	15.3698	ZYX
SORL1	5.11615e-16	0.157227	0.404	0.181	1.71585e-11	15.2911	SORL1
CARM1	5.12713e-16	0.174519	0.138	0.036	1.71954e-11	15.2901	CARM1
STT3B	5.20453e-16	0.128973	0.273	0.1	1.7455e-11	15.2836	STT3B
TPM4	5.39295e-16	0.0717832	0.517	0.275	1.80869e-11	15.2682	TPM4
MYDGF	5.5504e-16	-0.686012	0.362	0.345	1.86149e-11	15.2557	MYDGF
AZI2	5.56257e-16	0.16341	0.247	0.085	1.86557e-11	15.2547	AZI2
RGS2	5.7379e-16	0.0672867	0.505	0.279	1.92438e-11	15.2412	RGS2
SLC25A19	5.80279e-16	0.117377	0.22	0.07	1.94614e-11	15.2364	SLC25A19
ACADVL	5.92545e-16	0.133048	0.317	0.125	1.98728e-11	15.2273	ACADVL
ARID5A	5.94904e-16	0.185757	0.234	0.086	1.99519e-11	15.2256	ARID5A
ZFAND3	6.01048e-16	0.170961	0.19	0.059	2.01579e-11	15.2211	ZFAND3
TIPARP	6.33743e-16	0.226353	0.184	0.058	2.12545e-11	15.1981	TIPARP
SLC12A7	6.40396e-16	0.135354	0.155	0.038	2.14776e-11	15.1936	SLC12A7
ERN1	7.13321e-16	0.206611	0.147	0.039	2.39233e-11	15.1467	ERN1
SH3TC1	7.30687e-16	0.198077	0.149	0.044	2.45058e-11	15.1363	SH3TC1
PTPN2	7.49367e-16	0.131133	0.236	0.082	2.51323e-11	15.1253	PTPN2
C6orf89	7.56953e-16	0.158227	0.163	0.047	2.53867e-11	15.1209	C6orf89
DYNC1LI2	7.99853e-16	0.152213	0.228	0.075	2.68255e-11	15.097	DYNC1LI2
UBE3A	8.38817e-16	0.136365	0.245	0.087	2.81322e-11	15.0763	UBE3A
TAF10	8.71153e-16	0.141524	0.253	0.094	2.92167e-11	15.0599	TAF10
LACC1	8.79005e-16	0.192223	0.16	0.043	2.94801e-11	15.056	LACC1
ATP11C	9.21168e-16	0.167967	0.119	0.023	3.08941e-11	15.0357	ATP11C
ZBTB7A	9.70742e-16	0.1874	0.175	0.05	3.25567e-11	15.0129	ZBTB7A
CCT5	9.78207e-16	0.104682	0.345	0.145	3.28071e-11	15.0096	CCT5
BLVRA	9.92863e-16	0.0962865	0.386	0.172	3.32986e-11	15.0031	BLVRA
DEK	9.94153e-16	-0.0125599	0.526	0.269	3.33419e-11	15.0025	DEK
GSTO1	1.02846e-15	0.000284998	0.718	0.459	3.44925e-11	14.9878	GSTO1
SRSF2	1.04125e-15	0.0436367	0.546	0.295	3.49213e-11	14.9824	SRSF2
NFKBIA	1.04717e-15	0.0495577	0.794	0.563	3.512e-11	14.98	NFKBIA
ARRDC2	1.09143e-15	0.229571	0.175	0.056	3.66044e-11	14.962	ARRDC2
CAMK1D	1.1487e-15	0.177264	0.207	0.07	3.8525e-11	14.9398	CAMK1D
HVCN1	1.14973e-15	0.151449	0.206	0.064	3.85596e-11	14.9394	HVCN1
BIRC6	1.16606e-15	0.187499	0.236	0.08	3.91073e-11	14.9333	BIRC6
RNMT	1.23853e-15	0.145325	0.284	0.109	4.15379e-11	14.9071	RNMT
TMEM127	1.24663e-15	0.164464	0.2	0.069	4.18094e-11	14.9043	TMEM127
MRPL15	1.26873e-15	0.145349	0.216	0.069	4.25507e-11	14.8966	MRPL15
BTF3	1.47083e-15	-0.0587961	0.806	0.55	4.93287e-11	14.8324	BTF3
VPS26A	1.47824e-15	0.149025	0.263	0.094	4.95773e-11	14.8303	VPS26A
ZBTB4	1.51619e-15	0.151896	0.164	0.046	5.08501e-11	14.8192	ZBTB4
VCAN	1.59025e-15	0.411613	0.102	0.027	5.33339e-11	14.7985	VCAN
RTCA	1.63879e-15	0.141834	0.136	0.036	5.49618e-11	14.7855	RTCA
PTPN12	1.67316e-15	0.103536	0.34	0.144	5.61145e-11	14.7765	PTPN12
HSD17B12	1.74508e-15	0.187109	0.186	0.059	5.85264e-11	14.7582	HSD17B12
NR4A3	1.7859e-15	0.296952	0.234	0.084	5.98956e-11	14.7481	NR4A3
KIDINS220	1.80719e-15	0.153523	0.22	0.072	6.06094e-11	14.743	KIDINS220
ESF1	1.83177e-15	0.146243	0.242	0.084	6.14339e-11	14.7371	ESF1
DDX24	1.90132e-15	0.0407399	0.475	0.233	6.37665e-11	14.7209	DDX24
IFNAR2	1.91244e-15	0.149226	0.175	0.053	6.41393e-11	14.7184	IFNAR2
UTRN	1.95429e-15	0.134379	0.249	0.089	6.5543e-11	14.709	UTRN
PGD	1.97502e-15	0.137782	0.295	0.11	6.62382e-11	14.7044	PGD
EVI5	2.02013e-15	0.16032	0.186	0.057	6.77512e-11	14.6946	EVI5
EXOC1	2.0461e-15	0.159442	0.208	0.065	6.86222e-11	14.6891	EXOC1
KIF13B	2.0746e-15	0.156918	0.105	0.025	6.95779e-11	14.6831	KIF13B
TPST2	2.12487e-15	0.142384	0.249	0.09	7.1264e-11	14.6727	TPST2
SYNCRIP	2.26442e-15	0.106093	0.377	0.161	7.5944e-11	14.645	SYNCRIP
TM2D2	2.2691e-15	0.156024	0.221	0.071	7.61012e-11	14.6441	TM2D2
TMEM259	2.2824e-15	0.158331	0.299	0.114	7.6547e-11	14.6416	TMEM259
LIMD2	2.29163e-15	0.19403	0.288	0.112	7.68566e-11	14.6399	LIMD2
UBE2K	2.33728e-15	0.117499	0.326	0.134	7.83876e-11	14.6313	UBE2K
H2AFY	2.3562e-15	0.0408453	0.66	0.403	7.90224e-11	14.6278	H2AFY
RSRC2	2.434e-15	0.105983	0.409	0.196	8.16314e-11	14.6137	RSRC2
CACYBP	2.49322e-15	0.0918521	0.345	0.138	8.36177e-11	14.6032	CACYBP
VPS41	2.54434e-15	0.141191	0.183	0.051	8.53322e-11	14.5944	VPS41
CLIP1	2.58303e-15	0.164365	0.226	0.082	8.66296e-11	14.5879	CLIP1
KANSL1	2.60529e-15	0.150276	0.253	0.097	8.73762e-11	14.5841	KANSL1
SIPA1L2	2.65848e-15	0.182087	0.143	0.039	8.91601e-11	14.5754	SIPA1L2
RBBP6	2.66499e-15	0.159548	0.248	0.099	8.93785e-11	14.5743	RBBP6
SPG7	2.67611e-15	0.17023	0.238	0.085	8.97512e-11	14.5725	SPG7
TSPAN33	2.69002e-15	0.152364	0.146	0.041	9.02179e-11	14.5702	TSPAN33
ZYG11B	2.71121e-15	0.176247	0.173	0.05	9.09284e-11	14.5668	ZYG11B
HNRNPA3	2.75825e-15	0.0484292	0.593	0.328	9.25061e-11	14.5594	HNRNPA3
ARRDC3	2.7778e-15	0.26387	0.293	0.13	9.31617e-11	14.5563	ARRDC3
CHID1	2.79172e-15	0.175506	0.225	0.077	9.36287e-11	14.5541	CHID1
MBNL2	2.79848e-15	0.192004	0.119	0.027	9.38554e-11	14.5531	MBNL2
NHP2	2.81151e-15	-0.716709	0.256	0.253	9.42925e-11	14.5511	NHP2
PHYH	2.8528e-15	0.168297	0.147	0.041	9.56771e-11	14.5447	PHYH
ARHGAP10	3.02838e-15	0.161028	0.175	0.057	1.01566e-10	14.5188	ARHGAP10
KMT2C	3.10571e-15	0.136873	0.288	0.111	1.04159e-10	14.5078	KMT2C
GTF2I	3.12677e-15	0.0974441	0.394	0.181	1.04866e-10	14.5049	GTF2I
IDS	3.32158e-15	0.177349	0.316	0.137	1.11399e-10	14.4787	IDS
MGST3	3.34146e-15	0.0189902	0.663	0.409	1.12066e-10	14.4761	MGST3
AP1B1	3.36504e-15	0.140299	0.447	0.224	1.12857e-10	14.473	AP1B1
BTG3	3.50997e-15	0.185074	0.172	0.049	1.17717e-10	14.4547	BTG3
PINK1	3.67216e-15	0.184685	0.119	0.027	1.23157e-10	14.4351	PINK1
IPO7	3.72161e-15	0.178087	0.258	0.094	1.24815e-10	14.4293	IPO7
POLG2	3.77108e-15	0.184325	0.104	0.026	1.26474e-10	14.4235	POLG2
ARPC2	3.80461e-15	-0.0329515	0.861	0.636	1.27599e-10	14.4197	ARPC2
LILRA6	3.83928e-15	0.181365	0.113	0.027	1.28762e-10	14.4157	LILRA6
FEZ2	4.0808e-15	0.0901987	0.36	0.165	1.36862e-10	14.3893	FEZ2
VPS8	4.32709e-15	0.166439	0.154	0.044	1.45122e-10	14.3638	VPS8
CEP170	4.6894e-15	0.0847217	0.354	0.157	1.57273e-10	14.3289	CEP170
NAGK	4.82813e-15	0.0441379	0.538	0.286	1.61926e-10	14.3162	NAGK
CD2AP	4.87423e-15	0.173816	0.161	0.049	1.63472e-10	14.3121	CD2AP
KYNU	4.89424e-15	0.111396	0.22	0.076	1.64143e-10	14.3103	KYNU
TIMP1	5.23987e-15	-0.8154	0.372	0.357	1.75735e-10	14.2807	TIMP1
PLA2G15	5.31105e-15	0.186166	0.243	0.096	1.78122e-10	14.2748	PLA2G15
SYNGR2	5.32312e-15	-0.0370844	0.664	0.391	1.78527e-10	14.2738	SYNGR2
MYCBP2	5.34671e-15	0.0888497	0.33	0.14	1.79318e-10	14.2719	MYCBP2
SLA	5.36889e-15	0.0859082	0.377	0.171	1.80062e-10	14.2701	SLA
SPTAN1	5.42181e-15	0.177914	0.173	0.058	1.81837e-10	14.2659	SPTAN1
UBE2D1	5.72355e-15	0.0964423	0.311	0.13	1.91957e-10	14.2423	UBE2D1
LARP7	5.93121e-15	0.118391	0.319	0.124	1.98921e-10	14.2269	LARP7
LPGAT1	6.05538e-15	0.156775	0.199	0.062	2.03085e-10	14.2179	LPGAT1
RPS6KA2	6.08858e-15	0.148978	0.111	0.028	2.04199e-10	14.2155	RPS6KA2
IER2	6.25364e-15	0.101915	0.66	0.434	2.09735e-10	14.2039	IER2
NFKBIZ	6.42258e-15	0.117942	0.359	0.161	2.15401e-10	14.1923	NFKBIZ
VTI1B	6.53903e-15	0.123672	0.322	0.142	2.19306e-10	14.1845	VTI1B
CLMN	6.59867e-15	0.127434	0.122	0.024	2.21306e-10	14.1805	CLMN
FES	6.6353e-15	0.163967	0.164	0.053	2.22535e-10	14.1781	FES
OPTN	6.6979e-15	0.162577	0.135	0.03	2.24634e-10	14.1741	OPTN
IBTK	6.85103e-15	0.157502	0.178	0.051	2.2977e-10	14.1642	IBTK
LY96	7.10126e-15	-0.794344	0.537	0.478	2.38162e-10	14.1487	LY96
ALG13	7.16619e-15	0.173415	0.162	0.048	2.4034e-10	14.1447	ALG13
USP38	7.57042e-15	0.184899	0.109	0.024	2.53897e-10	14.1209	USP38
PPIP5K2	7.81655e-15	0.144116	0.163	0.052	2.62152e-10	14.107	PPIP5K2
GLRX5	8.21782e-15	0.184131	0.181	0.057	2.75609e-10	14.0852	GLRX5
CYB5R3	8.29895e-15	0.0993422	0.275	0.107	2.7833e-10	14.081	CYB5R3
TMEM30A	8.64424e-15	0.118421	0.294	0.11	2.8991e-10	14.0633	TMEM30A
GRSF1	9.16008e-15	0.157053	0.226	0.073	3.07211e-10	14.0381	GRSF1
DENND4C	9.2975e-15	0.150581	0.16	0.054	3.11819e-10	14.0316	DENND4C
MXD4	9.58047e-15	0.157467	0.208	0.076	3.2131e-10	14.0186	MXD4
TPI1	9.77884e-15	-9.81397e-05	0.793	0.556	3.27963e-10	14.0097	TPI1
PLEKHO2	9.90867e-15	0.125625	0.339	0.135	3.32317e-10	14.004	PLEKHO2
GPBP1	1.00345e-14	0.0676218	0.319	0.131	3.36538e-10	13.9985	GPBP1
WDR82	1.03545e-14	0.144523	0.233	0.081	3.4727e-10	13.9849	WDR82
DPYSL2	1.0381e-14	0.0990711	0.447	0.21	3.48158e-10	13.9838	DPYSL2
COMMD7	1.04077e-14	0.0861907	0.275	0.106	3.49054e-10	13.9826	COMMD7
SLC25A24	1.0794e-14	0.0856013	0.236	0.085	3.62009e-10	13.9668	SLC25A24
NDUFAF8	1.0966e-14	-0.627896	0.169	0.189	3.67779e-10	13.9599	NDUFAF8
SEMA3C	1.10407e-14	0.219811	0.112	0.03	3.70283e-10	13.957	SEMA3C
JAK2	1.124e-14	0.172646	0.149	0.041	3.76969e-10	13.9492	JAK2
VAC14	1.16804e-14	0.166813	0.129	0.029	3.91737e-10	13.9325	VAC14
GIMAP1	1.24742e-14	0.122531	0.239	0.083	4.18359e-10	13.904	GIMAP1
AUP1	1.27827e-14	0.0693747	0.39	0.177	4.28705e-10	13.8934	AUP1
CTBS	1.27859e-14	0.149444	0.193	0.064	4.28814e-10	13.8933	CTBS
SH3GLB1	1.28951e-14	0.093907	0.407	0.183	4.32475e-10	13.8896	SH3GLB1
NDUFA13	1.38772e-14	-0.719267	0.386	0.349	4.65412e-10	13.8577	NDUFA13
HOOK3	1.45424e-14	0.150381	0.244	0.092	4.87722e-10	13.8374	HOOK3
PSMD13	1.45664e-14	0.104217	0.276	0.105	4.88528e-10	13.8366	PSMD13
RPL13	1.48719e-14	-0.508954	0.992	0.959	4.98774e-10	13.8276	RPL13
GZF1	1.48903e-14	0.177312	0.124	0.037	4.99391e-10	13.8271	GZF1
MTMR10	1.52994e-14	0.169687	0.104	0.023	5.13113e-10	13.8153	MTMR10
AZIN1	1.55817e-14	0.156707	0.272	0.104	5.2258e-10	13.8074	AZIN1
NARS	1.58782e-14	0.0782138	0.341	0.147	5.32522e-10	13.7992	NARS
ITGAL	1.6346e-14	0.165272	0.126	0.027	5.48211e-10	13.7866	ITGAL
SET	1.75854e-14	-0.0339414	0.626	0.355	5.89779e-10	13.7548	SET
STAT2	1.76828e-14	0.134513	0.296	0.116	5.93044e-10	13.7524	STAT2
YTHDF2	1.80595e-14	0.092473	0.303	0.12	6.0568e-10	13.7433	YTHDF2
CLTA	1.81897e-14	-0.0373319	0.673	0.408	6.10046e-10	13.7402	CLTA
ENG	1.83443e-14	0.086974	0.37	0.154	6.15232e-10	13.7365	ENG
KIAA2026	1.84883e-14	0.178614	0.143	0.04	6.20062e-10	13.7331	KIAA2026
BOD1L1	1.86482e-14	0.151424	0.251	0.092	6.25423e-10	13.7294	BOD1L1
GLUD1	1.94299e-14	0.128565	0.306	0.126	6.51639e-10	13.7115	GLUD1
BRWD1	1.94563e-14	0.121293	0.172	0.055	6.52526e-10	13.7109	BRWD1
PURA	1.98193e-14	0.167725	0.184	0.056	6.64699e-10	13.7029	PURA
ZC3H12A	2.00316e-14	0.185926	0.139	0.043	6.71819e-10	13.6983	ZC3H12A
TRAM1	2.08141e-14	0.0132359	0.46	0.231	6.98062e-10	13.6816	TRAM1
ATXN1	2.09266e-14	0.142351	0.263	0.101	7.01835e-10	13.6793	ATXN1
UPP1	2.10941e-14	0.0733881	0.355	0.164	7.07454e-10	13.6758	UPP1
ALDH9A1	2.13892e-14	0.169346	0.205	0.077	7.17352e-10	13.6698	ALDH9A1
BICD2	2.16445e-14	0.178346	0.142	0.036	7.25913e-10	13.6647	BICD2
ZNF106	2.24008e-14	0.128769	0.289	0.118	7.51278e-10	13.6497	ZNF106
IRF3	2.31079e-14	0.126333	0.186	0.056	7.74993e-10	13.6362	IRF3
PGAM1	2.327e-14	0.0343631	0.467	0.247	7.80428e-10	13.6332	PGAM1
RFTN1	2.50992e-14	0.15082	0.114	0.026	8.41777e-10	13.6003	RFTN1
MAPRE1	2.5125e-14	0.0774006	0.358	0.155	8.42642e-10	13.5999	MAPRE1
RTN3	2.51468e-14	0.0531936	0.38	0.178	8.43373e-10	13.5995	RTN3
PIK3R1	2.55124e-14	0.104833	0.28	0.115	8.55636e-10	13.5932	PIK3R1
TM9SF3	2.72354e-14	0.120166	0.336	0.143	9.1342e-10	13.5649	TM9SF3
TPD52	2.75071e-14	0.144316	0.16	0.047	9.22534e-10	13.5606	TPD52
RNF213	2.77695e-14	-0.0200113	0.59	0.337	9.31335e-10	13.5564	RNF213
METRNL	2.82019e-14	0.135911	0.312	0.13	9.45836e-10	13.5497	METRNL
PTK2B	3.26579e-14	0.0850617	0.302	0.117	1.09528e-09	13.486	PTK2B
BAZ2B	3.27862e-14	0.163221	0.244	0.091	1.09958e-09	13.4843	BAZ2B
KRT19	3.50932e-14	-0.717393	0.248	0.248	1.17696e-09	13.4548	KRT19
DIAPH1	3.61813e-14	0.154167	0.185	0.055	1.21345e-09	13.4415	DIAPH1
PLK3	3.64992e-14	0.136185	0.273	0.117	1.22411e-09	13.4377	PLK3
PSMD8	3.69331e-14	0.0153768	0.454	0.238	1.23866e-09	13.4326	PSMD8
RAP1A	3.75253e-14	0.0127405	0.516	0.261	1.25852e-09	13.4257	RAP1A
SENP6	3.77692e-14	0.166968	0.194	0.066	1.2667e-09	13.4229	SENP6
ATP11A	3.84744e-14	0.136834	0.158	0.042	1.29035e-09	13.4148	ATP11A
RAB1B	3.96397e-14	0.120833	0.201	0.065	1.32944e-09	13.4019	RAB1B
LEPROT	4.19175e-14	0.110763	0.357	0.155	1.40583e-09	13.3776	LEPROT
GGA1	4.20893e-14	0.0959422	0.302	0.125	1.41159e-09	13.3758	GGA1
UQCRC1	4.23045e-14	0.0726822	0.349	0.151	1.41881e-09	13.3736	UQCRC1
STAU1	4.32368e-14	0.113747	0.275	0.109	1.45008e-09	13.3641	STAU1
TMED10	4.65648e-14	-0.0236649	0.623	0.355	1.56169e-09	13.3319	TMED10
CTDNEP1	4.94148e-14	0.121283	0.349	0.149	1.65727e-09	13.3061	CTDNEP1
UBAC1	5.07863e-14	0.108637	0.24	0.087	1.70327e-09	13.2943	UBAC1
BRCC3	5.27425e-14	0.131238	0.112	0.024	1.76888e-09	13.2778	BRCC3
CD300LF	5.32897e-14	0.151821	0.162	0.046	1.78723e-09	13.2734	CD300LF
MFSD12	5.50199e-14	0.0840245	0.339	0.142	1.84526e-09	13.2595	MFSD12
UBE2D2	5.77921e-14	0.0623072	0.402	0.192	1.93823e-09	13.2381	UBE2D2
SNX27	6.09803e-14	0.120935	0.216	0.078	2.04516e-09	13.2148	SNX27
UHRF1BP1	6.25578e-14	0.135703	0.106	0.021	2.09807e-09	13.2037	UHRF1BP1
EIF3D	6.26078e-14	0.0826993	0.342	0.154	2.09974e-09	13.2034	EIF3D
ID3	6.42941e-14	0.200306	0.246	0.104	2.1563e-09	13.1918	ID3
EPN1	6.4858e-14	0.173091	0.197	0.072	2.17521e-09	13.188	EPN1
CCT6A	6.51391e-14	0.119879	0.316	0.138	2.18463e-09	13.1862	CCT6A
CDK6	6.60989e-14	0.160896	0.155	0.046	2.21683e-09	13.1798	CDK6
VCPIP1	6.66024e-14	0.150663	0.145	0.041	2.23371e-09	13.1765	VCPIP1
GRK3	6.68678e-14	0.147396	0.186	0.064	2.24261e-09	13.1748	GRK3
GAPVD1	6.8784e-14	0.122513	0.149	0.045	2.30688e-09	13.1625	GAPVD1
FEM1B	6.91991e-14	0.148941	0.163	0.055	2.3208e-09	13.1599	FEM1B
TUBA1B	7.06169e-14	-0.0487	0.817	0.585	2.36835e-09	13.1511	TUBA1B
ATP5PB	7.3985e-14	0.0628647	0.483	0.252	2.48131e-09	13.1309	ATP5PB
USP8	7.39895e-14	0.117363	0.262	0.103	2.48146e-09	13.1308	USP8
MYL12A	7.44049e-14	-0.761007	0.737	0.644	2.49539e-09	13.1284	MYL12A
FRMD4A	7.82191e-14	0.103581	0.347	0.162	2.62331e-09	13.1067	FRMD4A
HBP1	7.9374e-14	0.145204	0.177	0.055	2.66204e-09	13.1003	HBP1
OGDH	7.96415e-14	0.135294	0.166	0.049	2.67102e-09	13.0989	OGDH
SLFN5	8.2118e-14	0.169559	0.146	0.045	2.75407e-09	13.0856	SLFN5
GSDME	8.40655e-14	0.165761	0.159	0.05	2.81939e-09	13.0754	GSDME
USP14	8.57039e-14	0.144106	0.215	0.07	2.87434e-09	13.067	USP14
SAV1	8.58866e-14	0.167311	0.112	0.028	2.88046e-09	13.0661	SAV1
RHOG	8.78768e-14	0.0107767	0.578	0.317	2.94721e-09	13.0561	RHOG
TET2	9.18965e-14	0.161493	0.175	0.058	3.08202e-09	13.0367	TET2
SMURF2	9.33609e-14	0.131966	0.219	0.078	3.13114e-09	13.0298	SMURF2
SRRM2	9.39676e-14	0.0240113	0.577	0.323	3.15149e-09	13.027	SRRM2
PTPRA	9.79042e-14	0.129366	0.177	0.06	3.28351e-09	13.0092	PTPRA
CLEC4A	9.88324e-14	0.103686	0.233	0.087	3.31464e-09	13.0051	CLEC4A
TMEM273	9.90742e-14	0.151574	0.115	0.027	3.32275e-09	13.004	TMEM273
SLC4A1AP	9.98026e-14	0.137382	0.11	0.026	3.34718e-09	13.0009	SLC4A1AP
YME1L1	1.00826e-13	0.0819099	0.419	0.207	3.38151e-09	12.9964	YME1L1
NME1	1.03938e-13	-0.62932	0.192	0.2	3.48587e-09	12.9832	NME1
PSMC1	1.0963e-13	0.0501453	0.347	0.156	3.67676e-09	12.9601	PSMC1
ADAM10	1.10186e-13	0.13241	0.312	0.122	3.69541e-09	12.9579	ADAM10
HSPA6	1.11426e-13	0.366899	0.244	0.107	3.73701e-09	12.953	HSPA6
CLN5	1.14576e-13	0.164373	0.195	0.063	3.84264e-09	12.9409	CLN5
NLRC5	1.15657e-13	0.139059	0.108	0.027	3.8789e-09	12.9368	NLRC5
PHF3	1.16808e-13	0.129766	0.226	0.08	3.91749e-09	12.9325	PHF3
IFI30	1.18367e-13	-0.739084	0.366	0.359	3.96979e-09	12.9268	IFI30
FAM13A	1.2008e-13	0.183095	0.125	0.034	4.02724e-09	12.9205	FAM13A
ARHGEF2	1.2067e-13	0.141064	0.179	0.058	4.04704e-09	12.9184	ARHGEF2
SNHG12	1.27736e-13	0.130957	0.222	0.091	4.284e-09	12.8937	SNHG12
RELA	1.28276e-13	0.144495	0.152	0.043	4.30212e-09	12.8919	RELA
PPP2R3C	1.2867e-13	0.143454	0.215	0.07	4.31533e-09	12.8905	PPP2R3C
CD52	1.28735e-13	0.336023	0.285	0.144	4.31753e-09	12.8903	CD52
PER3	1.31766e-13	0.182892	0.101	0.025	4.41918e-09	12.8802	PER3
INF2	1.35896e-13	0.149396	0.177	0.055	4.55767e-09	12.8668	INF2
MYO1F	1.38375e-13	0.0782803	0.352	0.16	4.64082e-09	12.8589	MYO1F
PIP4K2A	1.4287e-13	0.173629	0.177	0.055	4.79157e-09	12.8451	PIP4K2A
CAMK2D	1.43922e-13	0.130725	0.23	0.087	4.82684e-09	12.8419	CAMK2D
ANKRD17	1.49571e-13	0.126452	0.19	0.062	5.01632e-09	12.8252	ANKRD17
MARVELD1	1.59556e-13	0.146144	0.138	0.037	5.3512e-09	12.7971	MARVELD1
TMEM86A	1.65903e-13	0.126537	0.149	0.045	5.56405e-09	12.7801	TMEM86A
TTL	1.87707e-13	0.156249	0.121	0.034	6.29531e-09	12.7265	TTL
EXOC3	1.88632e-13	0.135331	0.142	0.04	6.32634e-09	12.7244	EXOC3
EHD1	1.96496e-13	0.183787	0.102	0.025	6.59008e-09	12.7066	EHD1
PCM1	2.09838e-13	0.114009	0.275	0.108	7.03756e-09	12.6781	PCM1
CFAP97	2.10903e-13	0.151132	0.181	0.059	7.07325e-09	12.6759	CFAP97
NUCB2	2.34838e-13	0.1329	0.176	0.053	7.87601e-09	12.6292	NUCB2
ETF1	2.38422e-13	0.145358	0.257	0.094	7.9962e-09	12.6227	ETF1
EEA1	2.39404e-13	0.113916	0.188	0.065	8.02914e-09	12.6209	EEA1
LRPAP1	2.41362e-13	0.0470734	0.467	0.241	8.09479e-09	12.6173	LRPAP1
G6PD	2.49681e-13	0.10868	0.132	0.041	8.37379e-09	12.6026	G6PD
SNX13	2.51246e-13	0.163001	0.143	0.041	8.4263e-09	12.5999	SNX13
IGF2R	2.53111e-13	0.156289	0.229	0.076	8.48882e-09	12.5967	IGF2R
HTATIP2	2.53544e-13	0.093532	0.228	0.086	8.50337e-09	12.5959	HTATIP2
UVRAG	2.56887e-13	0.139705	0.161	0.046	8.61546e-09	12.5903	UVRAG
GRAMD1A	2.59078e-13	0.163654	0.143	0.042	8.68897e-09	12.5866	GRAMD1A
RASSF5	2.65225e-13	0.141489	0.125	0.033	8.89511e-09	12.5764	RASSF5
AGAP3	2.91983e-13	0.131736	0.182	0.058	9.79254e-09	12.5346	AGAP3
PPP4R3A	3.00407e-13	0.196137	0.238	0.089	1.0075e-08	12.5223	PPP4R3A
ARL8A	3.01679e-13	0.122462	0.273	0.105	1.01177e-08	12.5205	ARL8A
HP1BP3	3.09401e-13	0.0584295	0.338	0.151	1.03767e-08	12.5095	HP1BP3
DOCK8	3.16233e-13	0.0573286	0.365	0.162	1.06058e-08	12.5	DOCK8
PRPS1	3.21531e-13	0.111922	0.151	0.047	1.07835e-08	12.4928	PRPS1
YIPF3	3.25641e-13	0.14107	0.26	0.101	1.09213e-08	12.4873	YIPF3
BCAP31	3.27801e-13	-0.00844813	0.591	0.329	1.09938e-08	12.4844	BCAP31
TNIP1	3.28522e-13	0.130463	0.202	0.065	1.1018e-08	12.4834	TNIP1
ARCN1	3.5022e-13	0.120544	0.179	0.056	1.17457e-08	12.4557	ARCN1
DNAJC2	3.61793e-13	0.131673	0.178	0.058	1.21338e-08	12.4415	DNAJC2
PSMB1	3.63765e-13	-0.0717641	0.635	0.375	1.21999e-08	12.4392	PSMB1
FNDC3B	3.64183e-13	0.0786292	0.381	0.171	1.2214e-08	12.4387	FNDC3B
SUMO2	3.69851e-13	-0.0455953	0.774	0.536	1.24041e-08	12.432	SUMO2
VASP	3.71131e-13	0.0839114	0.353	0.155	1.2447e-08	12.4305	VASP
SGPL1	3.72357e-13	0.132391	0.256	0.105	1.24881e-08	12.429	SGPL1
NDUFB3	3.7452e-13	-0.583008	0.231	0.22	1.25607e-08	12.4265	NDUFB3
CRYBG3	3.77008e-13	0.127853	0.111	0.025	1.26441e-08	12.4236	CRYBG3
DNAJC10	3.90872e-13	0.12293	0.197	0.065	1.31091e-08	12.408	DNAJC10
SLC16A3	4.01851e-13	0.0055548	0.556	0.31	1.34773e-08	12.3959	SLC16A3
SHLD2	4.18018e-13	0.126993	0.122	0.031	1.40195e-08	12.3788	SHLD2
PIP4P1	4.74043e-13	0.132046	0.149	0.044	1.58985e-08	12.3242	PIP4P1
CUL3	4.77797e-13	0.145789	0.152	0.042	1.60244e-08	12.3208	CUL3
PLBD2	4.8084e-13	0.134728	0.174	0.051	1.61264e-08	12.318	PLBD2
STX7	5.19063e-13	0.0755269	0.337	0.15	1.74083e-08	12.2848	STX7
ANKRD37	5.357e-13	0.188269	0.136	0.042	1.79663e-08	12.2711	ANKRD37
NPTN	5.44175e-13	0.0871925	0.251	0.098	1.82505e-08	12.2643	NPTN
MRPL27	5.60017e-13	-0.647756	0.247	0.23	1.87819e-08	12.2518	MRPL27
FFAR4	5.62563e-13	0.160432	0.141	0.04	1.88673e-08	12.2498	FFAR4
RALB	5.65273e-13	0.111061	0.145	0.04	1.89581e-08	12.2477	RALB
PHACTR2	5.69613e-13	0.118709	0.219	0.075	1.91037e-08	12.2444	PHACTR2
PRKCSH	5.92758e-13	0.115629	0.23	0.083	1.98799e-08	12.2271	PRKCSH
LPIN2	5.95136e-13	0.137329	0.216	0.085	1.99597e-08	12.2254	LPIN2
ZBED1	6.10227e-13	0.128033	0.148	0.045	2.04658e-08	12.2145	ZBED1
TOPORS	6.20143e-13	0.14352	0.134	0.04	2.07983e-08	12.2075	TOPORS
WAC	6.25963e-13	0.0888778	0.327	0.143	2.09936e-08	12.2035	WAC
HERPUD2	6.47325e-13	0.15381	0.139	0.037	2.171e-08	12.1889	HERPUD2
N4BP2L1	7.05766e-13	0.179101	0.132	0.033	2.367e-08	12.1513	N4BP2L1
VEGFA	7.07816e-13	0.180486	0.243	0.105	2.37387e-08	12.1501	VEGFA
CSNK1D	7.18188e-13	0.100547	0.245	0.106	2.40866e-08	12.1438	CSNK1D
BSG	7.27962e-13	0.00129279	0.453	0.227	2.44144e-08	12.1379	BSG
HERC5	7.53547e-13	-0.623516	0.097	0.119	2.52725e-08	12.1229	HERC5
WDR81	7.55035e-13	0.12639	0.156	0.05	2.53224e-08	12.122	WDR81
DHRS4L2	7.61661e-13	0.0824435	0.208	0.073	2.55446e-08	12.1182	DHRS4L2
LAMTOR4	7.83857e-13	-0.68576	0.563	0.487	2.6289e-08	12.1058	LAMTOR4
CTTNBP2NL	7.90083e-13	0.145084	0.176	0.053	2.64978e-08	12.1023	CTTNBP2NL
SFT2D2	8.10217e-13	0.0853441	0.284	0.104	2.71731e-08	12.0914	SFT2D2
CUL2	8.1713e-13	0.142369	0.124	0.03	2.74049e-08	12.0877	CUL2
SERINC2	8.33312e-13	0.164513	0.125	0.034	2.79476e-08	12.0792	SERINC2
UBE2Z	8.65979e-13	0.110209	0.275	0.106	2.90432e-08	12.0625	UBE2Z
LONP2	8.74327e-13	0.14763	0.197	0.079	2.93232e-08	12.0583	LONP2
RBL2	8.79331e-13	0.136574	0.113	0.028	2.9491e-08	12.0558	RBL2
SESTD1	9.15213e-13	0.141824	0.105	0.023	3.06944e-08	12.0385	SESTD1
ATG12	9.23511e-13	0.13579	0.253	0.094	3.09727e-08	12.0346	ATG12
CYB5R1	9.60676e-13	0.123944	0.18	0.07	3.22192e-08	12.0174	CYB5R1
SNX24	9.72493e-13	0.127883	0.202	0.068	3.26155e-08	12.0121	SNX24
CLCN7	1.02023e-12	0.126344	0.185	0.055	3.42166e-08	11.9913	CLCN7
AGO3	1.02771e-12	0.164953	0.149	0.047	3.44672e-08	11.9881	AGO3
PURB	1.03281e-12	0.182493	0.179	0.061	3.46383e-08	11.986	PURB
SLBP	1.05606e-12	0.122401	0.235	0.083	3.54183e-08	11.9763	SLBP
FKBP8	1.0699e-12	0.0775074	0.325	0.146	3.58824e-08	11.9707	FKBP8
RBM5	1.11128e-12	0.170663	0.213	0.08	3.72702e-08	11.9542	RBM5
TMEM167B	1.11188e-12	0.111438	0.16	0.05	3.72903e-08	11.9539	TMEM167B
SUPT20H	1.12523e-12	0.149381	0.131	0.039	3.7738e-08	11.9488	SUPT20H
HK1	1.13875e-12	0.103863	0.226	0.08	3.81913e-08	11.9436	HK1
NAAA	1.14997e-12	0.159599	0.186	0.062	3.85678e-08	11.9393	NAAA
FAM210A	1.15499e-12	0.158514	0.116	0.027	3.87362e-08	11.9374	FAM210A
RIC1	1.16796e-12	0.130184	0.116	0.027	3.91709e-08	11.9326	RIC1
APEX1	1.17666e-12	0.0522293	0.384	0.192	3.9463e-08	11.9293	APEX1
CREB1	1.17854e-12	0.153418	0.19	0.065	3.95258e-08	11.9287	CREB1
PSMD12	1.24419e-12	0.124149	0.186	0.06	4.17275e-08	11.9051	PSMD12
RBMX	1.27261e-12	0.0944968	0.324	0.152	4.26807e-08	11.8953	RBMX
PSMB10	1.2768e-12	-0.516809	0.114	0.138	4.28212e-08	11.8939	PSMB10
HEXB	1.3101e-12	0.0114909	0.492	0.257	4.39383e-08	11.8827	HEXB
RNF149	1.36463e-12	0.0164787	0.428	0.206	4.57668e-08	11.865	RNF149
UBE2S	1.38497e-12	0.152435	0.265	0.108	4.6449e-08	11.8586	UBE2S
GUSB	1.39282e-12	0.133543	0.286	0.121	4.67122e-08	11.8561	GUSB
CTSO	1.41433e-12	0.131028	0.148	0.042	4.74338e-08	11.8494	CTSO
APH1B	1.46068e-12	0.137539	0.168	0.049	4.89882e-08	11.8354	APH1B
VAT1	1.53482e-12	0.122057	0.277	0.109	5.14749e-08	11.8139	VAT1
TNPO1	1.54135e-12	0.064726	0.262	0.103	5.16937e-08	11.8121	TNPO1
SMCHD1	1.55462e-12	0.0974351	0.215	0.077	5.2139e-08	11.8084	SMCHD1
USP36	1.57524e-12	0.184727	0.185	0.061	5.28303e-08	11.8027	USP36
MAP3K3	1.60994e-12	0.150895	0.116	0.034	5.39943e-08	11.7932	MAP3K3
TENT5A	1.71749e-12	0.248013	0.245	0.103	5.76011e-08	11.7651	TENT5A
MAP4	1.74369e-12	0.0887091	0.238	0.09	5.848e-08	11.7585	MAP4
UBA6	1.92509e-12	0.153995	0.225	0.081	6.45636e-08	11.7155	UBA6
CDC27	1.93525e-12	0.146238	0.162	0.053	6.49043e-08	11.7133	CDC27
PRDM2	2.00871e-12	0.115073	0.175	0.064	6.73682e-08	11.6971	PRDM2
UTP3	2.01116e-12	0.114839	0.125	0.035	6.74504e-08	11.6966	UTP3
PSMF1	2.09016e-12	0.08497	0.258	0.106	7.00997e-08	11.6798	PSMF1
MED13	2.25162e-12	0.125261	0.192	0.073	7.55147e-08	11.6475	MED13
SERBP1	2.26319e-12	-0.00526881	0.575	0.322	7.59029e-08	11.6453	SERBP1
SLC35E3	2.43621e-12	0.160233	0.139	0.039	8.17056e-08	11.6133	SLC35E3
APOL6	2.44192e-12	0.0957061	0.28	0.106	8.1897e-08	11.6123	APOL6
ALAS1	2.50016e-12	0.12207	0.153	0.052	8.38503e-08	11.602	ALAS1
LNPEP	2.57474e-12	0.163459	0.198	0.071	8.63518e-08	11.5893	LNPEP
SRGAP1	2.60245e-12	0.156364	0.101	0.031	8.72811e-08	11.5846	SRGAP1
NDUFA1	2.63562e-12	-0.765685	0.572	0.487	8.83935e-08	11.5791	NDUFA1
GCNT1	2.68222e-12	0.1259	0.104	0.024	8.99562e-08	11.5715	GCNT1
SAMD9	2.74235e-12	0.132041	0.195	0.065	9.19729e-08	11.5619	SAMD9
GPRIN3	2.76398e-12	0.118386	0.247	0.101	9.26984e-08	11.5585	GPRIN3
UBE2E2	2.81697e-12	0.0898752	0.287	0.113	9.44756e-08	11.5502	UBE2E2
RTRAF	2.83223e-12	0.0099384	0.412	0.202	9.49872e-08	11.5479	RTRAF
AVPI1	2.84219e-12	0.126785	0.155	0.052	9.53215e-08	11.5463	AVPI1
DMXL1	3.22217e-12	0.143335	0.128	0.034	1.08065e-07	11.4919	DMXL1
PAFAH1B1	3.26187e-12	0.119047	0.228	0.083	1.09397e-07	11.4865	PAFAH1B1
SKIL	3.51399e-12	0.0946678	0.338	0.15	1.17852e-07	11.4542	SKIL
MAPK1IP1L	3.54984e-12	0.107565	0.236	0.088	1.19055e-07	11.4498	MAPK1IP1L
TAF9	3.57017e-12	0.122248	0.221	0.082	1.19736e-07	11.4473	TAF9
ATP1B1	3.57376e-12	0.0606794	0.305	0.142	1.19857e-07	11.4469	ATP1B1
VAV1	3.58378e-12	0.118761	0.185	0.063	1.20193e-07	11.4457	VAV1
IRF8	3.59856e-12	0.0962442	0.288	0.131	1.20688e-07	11.4439	IRF8
AHCY	3.60893e-12	0.112365	0.155	0.054	1.21036e-07	11.4426	AHCY
NECTIN2	3.74085e-12	0.122927	0.22	0.082	1.25461e-07	11.427	NECTIN2
MIR155HG	3.74387e-12	0.187342	0.135	0.037	1.25562e-07	11.4267	MIR155HG
MRPL14	3.78434e-12	-0.648354	0.258	0.247	1.26919e-07	11.422	MRPL14
GLRX2	3.79437e-12	0.105347	0.176	0.055	1.27255e-07	11.4209	GLRX2
RETREG2	3.81844e-12	0.137301	0.153	0.049	1.28063e-07	11.4181	RETREG2
FAF2	3.82729e-12	0.110318	0.12	0.032	1.2836e-07	11.4171	FAF2
TMBIM6	3.8363e-12	-0.132462	0.849	0.627	1.28662e-07	11.4161	TMBIM6
GIMAP6	3.84769e-12	0.129614	0.159	0.05	1.29044e-07	11.4148	GIMAP6
MTHFD1	3.86257e-12	0.12447	0.102	0.022	1.29543e-07	11.4131	MTHFD1
SHKBP1	3.91915e-12	0.117241	0.207	0.079	1.31441e-07	11.4068	SHKBP1
RAB10	3.92336e-12	-0.00801072	0.45	0.221	1.31582e-07	11.4063	RAB10
MICAL1	4.00264e-12	0.141931	0.162	0.049	1.34241e-07	11.3977	MICAL1
LARP1	4.0037e-12	0.0883291	0.277	0.118	1.34276e-07	11.3975	LARP1
NMRK1	4.05242e-12	0.144984	0.123	0.033	1.3591e-07	11.3923	NMRK1
CD47	4.22689e-12	0.00845179	0.434	0.207	1.41761e-07	11.374	CD47
TRIB1	4.26644e-12	0.152386	0.199	0.08	1.43088e-07	11.3699	TRIB1
THRAP3	4.36256e-12	0.07322	0.325	0.148	1.46311e-07	11.3603	THRAP3
RREB1	4.37776e-12	0.114437	0.239	0.092	1.46821e-07	11.3587	RREB1
OSTM1	4.73085e-12	0.0840066	0.221	0.087	1.58663e-07	11.3251	OSTM1
PHB2	4.84357e-12	0.0662892	0.294	0.128	1.62444e-07	11.3148	PHB2
SORBS3	5.09664e-12	0.118054	0.168	0.057	1.70931e-07	11.2927	SORBS3
DAAM1	5.21455e-12	0.142078	0.158	0.056	1.74885e-07	11.2828	DAAM1
ICE2	5.25091e-12	0.154773	0.118	0.034	1.76105e-07	11.2798	ICE2
PI4K2A	5.34753e-12	0.162951	0.162	0.054	1.79345e-07	11.2718	PI4K2A
PACS1	5.53672e-12	0.123543	0.102	0.029	1.85691e-07	11.2567	PACS1
SLC30A7	5.54799e-12	0.119374	0.17	0.059	1.86069e-07	11.2559	SLC30A7
CYTH1	5.54892e-12	0.115803	0.273	0.112	1.861e-07	11.2558	CYTH1
FBXL5	5.578e-12	0.126132	0.236	0.085	1.87075e-07	11.2535	FBXL5
RDH11	5.68745e-12	0.133547	0.212	0.077	1.90746e-07	11.2451	RDH11
UVSSA	5.71119e-12	0.162273	0.128	0.033	1.91542e-07	11.2433	UVSSA
CITED2	5.72426e-12	0.189062	0.304	0.14	1.9198e-07	11.2423	CITED2
DNAJB12	5.76656e-12	0.129127	0.17	0.057	1.93399e-07	11.2391	DNAJB12
CHM	5.80068e-12	0.132449	0.132	0.039	1.94543e-07	11.2365	CHM
GTF2F2	5.89734e-12	0.132202	0.176	0.057	1.97785e-07	11.2293	GTF2F2
PAFAH1B2	5.95292e-12	0.131277	0.235	0.085	1.99649e-07	11.2253	PAFAH1B2
DDX39B	5.95982e-12	0.132931	0.103	0.025	1.99881e-07	11.2248	DDX39B
EVL	5.97488e-12	0.0557712	0.376	0.181	2.00386e-07	11.2237	EVL
ATF7IP	6.01524e-12	0.135395	0.176	0.061	2.01739e-07	11.2207	ATF7IP
MBD2	6.08943e-12	0.102235	0.224	0.081	2.04227e-07	11.2154	MBD2
CHMP2B	6.37893e-12	0.12042	0.256	0.105	2.13936e-07	11.1953	CHMP2B
SUN2	6.39557e-12	0.116478	0.172	0.055	2.14495e-07	11.1941	SUN2
UBE2W	6.68007e-12	0.104636	0.221	0.082	2.24036e-07	11.1752	UBE2W
LST1	6.71534e-12	-0.708526	0.626	0.536	2.25219e-07	11.1729	LST1
WWP1	6.82812e-12	0.168287	0.136	0.047	2.29002e-07	11.1657	WWP1
TARS	7.00584e-12	0.0776198	0.154	0.046	2.34962e-07	11.1545	TARS
NRBP1	7.58711e-12	0.1001	0.23	0.094	2.54457e-07	11.1199	NRBP1
ATP1A1	7.86696e-12	0.0924099	0.389	0.18	2.63842e-07	11.1042	ATP1A1
GLG1	7.89083e-12	0.108345	0.239	0.085	2.64643e-07	11.1029	GLG1
NIPSNAP2	8.35797e-12	0.0732054	0.261	0.108	2.8031e-07	11.0779	NIPSNAP2
FCHSD2	8.50775e-12	0.104818	0.116	0.037	2.85333e-07	11.0702	FCHSD2
KARS	8.66118e-12	0.123019	0.214	0.086	2.90479e-07	11.0624	KARS
SMIM3	8.66296e-12	0.112818	0.106	0.027	2.90538e-07	11.0623	SMIM3
LGMN	8.70928e-12	0.161669	0.679	0.483	2.92092e-07	11.06	LGMN
ATP5MG	8.78452e-12	-0.665617	0.784	0.698	2.94615e-07	11.0563	ATP5MG
MINK1	8.83448e-12	0.125458	0.121	0.036	2.96291e-07	11.0538	MINK1
METTL5	9.20573e-12	0.107189	0.193	0.065	3.08742e-07	11.0359	METTL5
S100A9	9.36831e-12	0.185137	0.42	0.234	3.14195e-07	11.0283	S100A9
FGR	9.54857e-12	0.121783	0.22	0.083	3.2024e-07	11.0201	FGR
FMN1	9.55095e-12	0.124219	0.137	0.037	3.2032e-07	11.02	FMN1
OSBPL11	9.76396e-12	0.126172	0.183	0.057	3.27464e-07	11.0104	OSBPL11
DNAJA4	9.78375e-12	0.23595	0.179	0.071	3.28128e-07	11.0095	DNAJA4
ANKRD49	1.02311e-11	0.111863	0.101	0.026	3.4313e-07	10.9901	ANKRD49
GAK	1.02586e-11	0.121521	0.209	0.076	3.44053e-07	10.9889	GAK
AP3B1	1.03162e-11	0.142874	0.191	0.068	3.45984e-07	10.9865	AP3B1
PSMB4	1.0376e-11	0.0587634	0.332	0.148	3.47992e-07	10.984	PSMB4
SLC9A9	1.0418e-11	0.150621	0.11	0.031	3.494e-07	10.9822	SLC9A9
SNRPF	1.07699e-11	-0.680492	0.324	0.295	3.612e-07	10.9678	SNRPF
PDXDC1	1.08261e-11	0.13772	0.189	0.065	3.63086e-07	10.9655	PDXDC1
FAM208A	1.10706e-11	0.110954	0.156	0.053	3.71285e-07	10.9558	FAM208A
SIGLEC14	1.1188e-11	0.131697	0.102	0.023	3.75222e-07	10.9512	SIGLEC14
EMC3	1.12666e-11	0.0308029	0.3	0.127	3.7786e-07	10.9482	EMC3
FTX	1.1585e-11	0.143433	0.148	0.046	3.88537e-07	10.9361	FTX
B4GALT1	1.15862e-11	0.109566	0.269	0.109	3.88579e-07	10.9361	B4GALT1
PSMD3	1.16697e-11	0.096092	0.228	0.09	3.91377e-07	10.9329	PSMD3
STX4	1.17246e-11	0.0884112	0.315	0.145	3.93221e-07	10.9309	STX4
CD72	1.17633e-11	0.122183	0.168	0.05	3.94517e-07	10.9295	CD72
ZBTB10	1.18492e-11	0.161626	0.11	0.029	3.974e-07	10.9263	ZBTB10
BCAP29	1.18784e-11	0.107095	0.189	0.063	3.98378e-07	10.9252	BCAP29
ATP5F1B	1.25137e-11	-0.0114378	0.541	0.31	4.19685e-07	10.9026	ATP5F1B
TCOF1	1.34894e-11	0.138052	0.212	0.085	4.52407e-07	10.87	TCOF1
MRPL3	1.35568e-11	0.134917	0.195	0.07	4.54667e-07	10.8678	MRPL3
OTULIN	1.39634e-11	0.122355	0.135	0.041	4.68304e-07	10.855	OTULIN
NBN	1.39896e-11	0.127384	0.188	0.066	4.69184e-07	10.8542	NBN
RAB20	1.41359e-11	0.0953313	0.273	0.115	4.74089e-07	10.8497	RAB20
PLEKHM2	1.4407e-11	0.104251	0.202	0.078	4.83182e-07	10.8414	PLEKHM2
UHMK1	1.45985e-11	0.118054	0.246	0.094	4.89605e-07	10.8357	UHMK1
WTAP	1.47088e-11	0.0364223	0.335	0.15	4.93305e-07	10.8324	WTAP
BRD7	1.47447e-11	0.0962227	0.18	0.066	4.94507e-07	10.8314	BRD7
VAMP3	1.52337e-11	0.0911736	0.249	0.105	5.10909e-07	10.8172	VAMP3
UBE2J1	1.53089e-11	0.113305	0.199	0.072	5.13431e-07	10.8151	UBE2J1
STXBP2	1.61018e-11	0.0814588	0.266	0.108	5.40022e-07	10.7931	STXBP2
PAG1	1.61819e-11	0.112945	0.259	0.101	5.4271e-07	10.791	PAG1
EIF3A	1.64729e-11	-0.0134184	0.483	0.247	5.52467e-07	10.7832	EIF3A
CSK	1.70881e-11	0.0838086	0.297	0.123	5.73099e-07	10.7673	CSK
USP34	1.72018e-11	0.100513	0.191	0.074	5.76913e-07	10.7644	USP34
SNX14	1.72058e-11	0.117932	0.181	0.062	5.77048e-07	10.7643	SNX14
WASF2	1.73588e-11	0.0688358	0.38	0.185	5.8218e-07	10.7605	WASF2
MYO1C	1.73765e-11	0.108143	0.188	0.066	5.82772e-07	10.76	MYO1C
SEC11C	2.05426e-11	0.110693	0.279	0.119	6.88958e-07	10.6873	SEC11C
YTHDF3	2.07451e-11	0.0790616	0.218	0.085	6.95749e-07	10.6831	YTHDF3
GNPDA1	2.08316e-11	0.0352124	0.315	0.137	6.98652e-07	10.6813	GNPDA1
PPIG	2.15155e-11	-0.00609358	0.484	0.245	7.21586e-07	10.6672	PPIG
DDX42	2.17858e-11	0.128649	0.17	0.061	7.30652e-07	10.6618	DDX42
TMEM147	2.26126e-11	-0.653903	0.358	0.311	7.5838e-07	10.6457	TMEM147
STUB1	2.26515e-11	0.0481382	0.307	0.132	7.59687e-07	10.6449	STUB1
MTMR14	2.27037e-11	0.131284	0.18	0.062	7.61436e-07	10.6439	MTMR14
ROMO1	2.28737e-11	-0.703799	0.389	0.34	7.67139e-07	10.6407	ROMO1
EXOC5	2.3348e-11	0.116932	0.194	0.065	7.83045e-07	10.6318	EXOC5
NRDC	2.39941e-11	0.0915372	0.205	0.072	8.04713e-07	10.6199	NRDC
ZMIZ2	2.4108e-11	0.14196	0.125	0.037	8.08532e-07	10.6178	ZMIZ2
MUCL1	2.5155e-11	0.098614	0.124	0.043	8.43649e-07	10.5994	MUCL1
NANS	2.55488e-11	0.0335383	0.346	0.16	8.56856e-07	10.5926	NANS
PCNP	2.568e-11	0.0909314	0.286	0.123	8.61254e-07	10.5904	PCNP
PPIB	2.56994e-11	-0.738494	0.618	0.535	8.61907e-07	10.5901	PPIB
NAGA	2.57703e-11	0.0681192	0.295	0.126	8.64284e-07	10.5889	NAGA
P2RY13	2.66996e-11	0.134452	0.174	0.064	8.95451e-07	10.5735	P2RY13
FNBP4	2.70787e-11	0.113968	0.216	0.084	9.08167e-07	10.5674	FNBP4
RPS27L	2.81256e-11	-0.793591	0.737	0.635	9.43275e-07	10.5509	RPS27L
ADD1	2.86358e-11	0.0800793	0.219	0.089	9.60387e-07	10.5431	ADD1
PRKX	2.87142e-11	0.127608	0.166	0.057	9.63018e-07	10.5419	PRKX
SH3BP2	2.8861e-11	0.105868	0.236	0.094	9.67941e-07	10.5397	SH3BP2
BTK	2.92956e-11	0.0998142	0.182	0.062	9.82517e-07	10.5332	BTK
OXR1	2.96054e-11	0.155483	0.128	0.04	9.92908e-07	10.5286	OXR1
RARS	3.01395e-11	0.074764	0.182	0.058	1.01082e-06	10.5209	RARS
CCDC91	3.09951e-11	0.123835	0.167	0.055	1.03951e-06	10.5087	CCDC91
DPP9	3.11531e-11	0.155439	0.145	0.044	1.04481e-06	10.5065	DPP9
ACAA2	3.17787e-11	0.108873	0.22	0.088	1.0658e-06	10.4979	ACAA2
FAM213A	3.18608e-11	0.12098	0.21	0.08	1.06855e-06	10.4967	FAM213A
LYRM2	3.29032e-11	0.11139	0.196	0.07	1.10351e-06	10.4828	LYRM2
CYB5R4	3.36275e-11	0.106245	0.172	0.06	1.1278e-06	10.4733	CYB5R4
ATP9B	3.36707e-11	0.1302	0.118	0.03	1.12925e-06	10.4727	ATP9B
TOP1	3.42696e-11	0.0247794	0.384	0.189	1.14933e-06	10.4651	TOP1
ATXN10	3.44197e-11	0.113113	0.198	0.073	1.15437e-06	10.4632	ATXN10
LRP1	3.52361e-11	0.0399682	0.396	0.192	1.18175e-06	10.453	LRP1
SELENOW	3.63623e-11	-0.0438962	0.514	0.279	1.21952e-06	10.4393	SELENOW
SLC46A3	3.65345e-11	0.130465	0.132	0.039	1.2253e-06	10.4373	SLC46A3
ACTR10	3.71629e-11	0.096819	0.189	0.066	1.24637e-06	10.4299	ACTR10
SMG1	3.73201e-11	0.0934154	0.248	0.105	1.25164e-06	10.4281	SMG1
AL355075.4	3.79295e-11	0.19602	0.132	0.043	1.27208e-06	10.421	AL355075.4
DAPP1	3.81433e-11	0.114071	0.189	0.063	1.27925e-06	10.4186	DAPP1
HSD17B11	3.86038e-11	0.0966445	0.351	0.16	1.2947e-06	10.4134	HSD17B11
MAP3K11	4.17422e-11	0.0814457	0.188	0.071	1.39995e-06	10.3794	MAP3K11
ARL14EP	4.19437e-11	0.0960212	0.15	0.046	1.40671e-06	10.3773	ARL14EP
EFCAB14	4.43238e-11	0.0791527	0.233	0.094	1.48653e-06	10.3534	EFCAB14
PRKACB	4.48106e-11	0.111329	0.212	0.079	1.50286e-06	10.3486	PRKACB
TPMT	4.51425e-11	0.0853273	0.2	0.072	1.51399e-06	10.3454	TPMT
CAPZA1	4.6319e-11	-0.0808227	0.553	0.304	1.55345e-06	10.3342	CAPZA1
WDR45B	4.64001e-11	0.140145	0.252	0.102	1.55617e-06	10.3335	WDR45B
ARMCX3	4.7456e-11	0.131639	0.268	0.114	1.59158e-06	10.3237	ARMCX3
EIF3G	4.84689e-11	-0.00699743	0.436	0.229	1.62555e-06	10.3145	EIF3G
DNAJB4	4.85049e-11	0.198004	0.115	0.037	1.62676e-06	10.3142	DNAJB4
PNN	4.86449e-11	0.0972692	0.26	0.108	1.63145e-06	10.313	PNN
CSNK1A1	4.94621e-11	0.0246851	0.431	0.219	1.65886e-06	10.3057	CSNK1A1
GTPBP6	4.96541e-11	0.12292	0.116	0.035	1.6653e-06	10.304	GTPBP6
STK25	4.99006e-11	0.144692	0.144	0.047	1.67357e-06	10.3019	STK25
AGFG1	5.02539e-11	0.134265	0.143	0.041	1.68542e-06	10.2988	AGFG1
CNOT6L	5.04357e-11	0.121716	0.141	0.044	1.69151e-06	10.2973	CNOT6L
USP10	5.19173e-11	0.0965729	0.145	0.05	1.7412e-06	10.2847	USP10
RPF2	5.24271e-11	0.089954	0.152	0.053	1.7583e-06	10.2804	RPF2
CSGALNACT2	5.35636e-11	0.094463	0.16	0.058	1.79642e-06	10.2711	CSGALNACT2
GLA	5.47977e-11	0.100919	0.286	0.115	1.83781e-06	10.2612	GLA
THAP11	5.52005e-11	0.12646	0.113	0.031	1.85131e-06	10.2581	THAP11
PSME1	5.52583e-11	-0.0981583	0.674	0.412	1.85325e-06	10.2576	PSME1
ARRDC4	5.795e-11	0.136712	0.107	0.027	1.94353e-06	10.2369	ARRDC4
STAT5A	5.79707e-11	0.0976138	0.184	0.062	1.94422e-06	10.2368	STAT5A
DHX36	5.92602e-11	0.0326877	0.316	0.137	1.98747e-06	10.2272	DHX36
OSBPL8	6.08933e-11	0.100656	0.325	0.162	2.04224e-06	10.2154	OSBPL8
CYTH4	6.27036e-11	0.104105	0.263	0.112	2.10295e-06	10.2027	CYTH4
SESN1	6.36573e-11	0.172594	0.126	0.043	2.13494e-06	10.1962	SESN1
UBA2	6.3786e-11	0.111344	0.18	0.059	2.13926e-06	10.1953	UBA2
NT5C2	6.45737e-11	0.100163	0.131	0.036	2.16567e-06	10.1899	NT5C2
HIST1H4C	6.51884e-11	-0.665699	0.235	0.224	2.18629e-06	10.1858	HIST1H4C
UGCG	6.5322e-11	0.106612	0.271	0.117	2.19077e-06	10.1849	UGCG
CUX1	6.57829e-11	0.0848238	0.217	0.092	2.20623e-06	10.1819	CUX1
SKI	6.66208e-11	0.128962	0.122	0.039	2.23433e-06	10.1764	SKI
Z93930.2	7.0647e-11	0.115482	0.112	0.031	2.36936e-06	10.1509	Z93930.2
GNA15	7.65776e-11	0.0886652	0.171	0.067	2.56826e-06	10.1159	GNA15
STX11	7.67962e-11	0.105026	0.19	0.066	2.57559e-06	10.1147	STX11
LZIC	7.75683e-11	0.129087	0.131	0.035	2.60149e-06	10.1103	LZIC
DHX9	7.80203e-11	0.110977	0.182	0.062	2.61665e-06	10.1078	DHX9
POM121C	7.81394e-11	0.102827	0.101	0.029	2.62064e-06	10.1071	POM121C
MFHAS1	7.85155e-11	0.132961	0.115	0.033	2.63325e-06	10.105	MFHAS1
DCTN1	8.10019e-11	0.100671	0.113	0.032	2.71664e-06	10.0915	DCTN1
EPM2AIP1	8.19763e-11	0.147611	0.109	0.031	2.74932e-06	10.0863	EPM2AIP1
PPP1R7	8.33231e-11	0.0871686	0.259	0.107	2.79449e-06	10.0792	PPP1R7
DNAJB9	8.38547e-11	0.108107	0.165	0.054	2.81232e-06	10.0765	DNAJB9
PSMD2	8.40291e-11	0.0659536	0.273	0.116	2.81817e-06	10.0756	PSMD2
EIF3F	8.50136e-11	0.0310733	0.429	0.228	2.85119e-06	10.0705	EIF3F
OLA1	8.53485e-11	0.097871	0.179	0.066	2.86242e-06	10.0688	OLA1
PIK3CB	8.67472e-11	0.136193	0.107	0.03	2.90933e-06	10.0617	PIK3CB
POLK	8.72978e-11	0.105604	0.159	0.056	2.92779e-06	10.059	POLK
2022-09-06	8.82501e-11	0.0912916	0.215	0.083	2.95973e-06	10.0543	2022-09-06
EEF1D	8.99262e-11	-0.625614	0.791	0.684	3.01594e-06	10.0461	EEF1D
PSAP	9.03762e-11	0.070612	0.982	0.933	3.03104e-06	10.0439	PSAP
ARL1	9.10157e-11	0.105941	0.19	0.064	3.05248e-06	10.0409	ARL1
TIAL1	9.2863e-11	0.0713424	0.198	0.073	3.11444e-06	10.0322	TIAL1
SLC35A4	9.48039e-11	0.1319	0.131	0.038	3.17953e-06	10.0232	SLC35A4
TBC1D5	9.53243e-11	0.0678584	0.17	0.054	3.19699e-06	10.0208	TBC1D5
APMAP	9.94565e-11	0.131229	0.225	0.087	3.33557e-06	10.0024	APMAP
PHTF2	9.96224e-11	0.129506	0.119	0.03	3.34113e-06	10.0016	PHTF2
VPS4A	1.00644e-10	0.122104	0.152	0.053	3.37541e-06	9.99721	VPS4A
PJA2	1.00806e-10	0.0937218	0.285	0.119	3.38082e-06	9.99651	PJA2
LRRFIP2	1.01117e-10	0.124241	0.149	0.048	3.39127e-06	9.99517	LRRFIP2
SUMF1	1.0463e-10	0.0817425	0.171	0.063	3.50909e-06	9.98034	SUMF1
ITPR1	1.06394e-10	0.0998819	0.107	0.03	3.56825e-06	9.97308	ITPR1
FAM89B	1.06898e-10	0.125775	0.15	0.044	3.58514e-06	9.97103	FAM89B
PCYOX1	1.07136e-10	0.14123	0.119	0.034	3.59314e-06	9.97006	PCYOX1
PUM2	1.0888e-10	0.102619	0.178	0.063	3.65161e-06	9.96305	PUM2
ACBD5	1.10364e-10	0.117209	0.152	0.053	3.70138e-06	9.95717	ACBD5
GNPAT	1.15094e-10	0.111525	0.113	0.03	3.86003e-06	9.93895	GNPAT
INPP5D	1.16182e-10	0.107407	0.259	0.104	3.8965e-06	9.93486	INPP5D
CHP1	1.18708e-10	0.121901	0.208	0.076	3.98122e-06	9.92552	CHP1
RPS28	1.24691e-10	-0.374457	0.991	0.95	4.18189e-06	9.90416	RPS28
UGGT1	1.26884e-10	0.115238	0.124	0.041	4.25544e-06	9.89659	UGGT1
PITHD1	1.27694e-10	0.0709629	0.235	0.103	4.28259e-06	9.89383	PITHD1
PPP4C	1.2787e-10	-0.522141	0.206	0.208	4.28851e-06	9.89323	PPP4C
QRICH1	1.29739e-10	0.121769	0.123	0.037	4.35117e-06	9.88693	QRICH1
AC245014.3	1.30888e-10	-0.672117	0.183	0.192	4.38972e-06	9.8831	AC245014.3
AKT1S1	1.31529e-10	0.131778	0.131	0.04	4.41123e-06	9.88098	AKT1S1
ROCK2	1.34915e-10	0.127545	0.121	0.037	4.52479e-06	9.86994	ROCK2
NDUFA2	1.36042e-10	-0.672384	0.438	0.366	4.56258e-06	9.86633	NDUFA2
ARHGAP17	1.36429e-10	0.126627	0.129	0.039	4.57555e-06	9.86509	ARHGAP17
RUFY1	1.39849e-10	0.0892553	0.161	0.053	4.69026e-06	9.85434	RUFY1
ZC3H14	1.40737e-10	0.136268	0.105	0.028	4.72002e-06	9.85159	ZC3H14
PQLC3	1.44054e-10	0.0910755	0.256	0.103	4.83127e-06	9.84148	PQLC3
NUTF2	1.46112e-10	-0.537199	0.175	0.176	4.90031e-06	9.83531	NUTF2
SHPRH	1.49814e-10	0.115351	0.132	0.044	5.02447e-06	9.82445	SHPRH
HNMT	1.5111e-10	-0.103348	0.507	0.279	5.06794e-06	9.82071	HNMT
BIN2	1.51228e-10	0.127952	0.175	0.067	5.07188e-06	9.82037	BIN2
MKNK1	1.58785e-10	0.0842883	0.239	0.096	5.32534e-06	9.79919	MKNK1
RAB31	1.5981e-10	-0.0575487	0.576	0.332	5.3597e-06	9.7964	RAB31
PRPF38B	1.61179e-10	0.00261255	0.413	0.215	5.40563e-06	9.79269	PRPF38B
MADD	1.61426e-10	0.117816	0.124	0.033	5.41392e-06	9.79203	MADD
NGLY1	1.62823e-10	0.115434	0.137	0.041	5.46075e-06	9.78829	NGLY1
TRAF3	1.63695e-10	0.103167	0.111	0.031	5.48999e-06	9.78597	TRAF3
CLOCK	1.6884e-10	0.116344	0.113	0.03	5.66254e-06	9.77253	CLOCK
CCSER2	1.71726e-10	0.11911	0.135	0.045	5.75935e-06	9.76516	CCSER2
MARK2	1.72136e-10	0.108237	0.119	0.038	5.77311e-06	9.76413	MARK2
PCGF5	1.73164e-10	0.0684028	0.202	0.075	5.80756e-06	9.76154	PCGF5
SRP68	1.76128e-10	0.115461	0.102	0.028	5.90699e-06	9.75417	SRP68
AP1S2	1.78973e-10	-0.0164571	0.52	0.292	6.0024e-06	9.74721	AP1S2
HNRNPDL	1.79384e-10	-0.0933649	0.583	0.336	6.0162e-06	9.74622	HNRNPDL
BAZ2A	1.79421e-10	0.108697	0.155	0.055	6.01741e-06	9.74613	BAZ2A
PPP2R5C	1.80287e-10	0.0877343	0.243	0.099	6.04647e-06	9.74404	PPP2R5C
IQSEC1	1.86796e-10	0.128624	0.123	0.034	6.26477e-06	9.72863	IQSEC1
OGFR	1.87541e-10	0.0588741	0.236	0.096	6.28974e-06	9.7269	OGFR
TAOK3	1.87803e-10	-0.00932194	0.465	0.243	6.29853e-06	9.7263	TAOK3
BOLA3	1.88408e-10	-0.451241	0.117	0.128	6.31882e-06	9.7249	BOLA3
TRIM44	1.90643e-10	0.0493334	0.261	0.111	6.3938e-06	9.71978	TRIM44
CCNH	1.95901e-10	0.115957	0.216	0.087	6.57014e-06	9.70796	CCNH
TNS1	1.96247e-10	0.136761	0.128	0.041	6.58173e-06	9.7072	TNS1
FAM120A	1.97205e-10	0.0231837	0.359	0.167	6.61385e-06	9.70508	FAM120A
KCNAB2	1.99937e-10	0.0862268	0.212	0.079	6.70548e-06	9.69911	KCNAB2
ACOX1	2.05849e-10	0.132075	0.145	0.047	6.90378e-06	9.68645	ACOX1
UPF1	2.08301e-10	0.11035	0.124	0.033	6.98598e-06	9.68131	UPF1
ACER3	2.08322e-10	0.061366	0.249	0.107	6.98669e-06	9.68127	ACER3
WDFY3	2.10766e-10	0.13417	0.133	0.041	7.06866e-06	9.6762	WDFY3
GALNT1	2.15574e-10	0.0764673	0.226	0.089	7.22991e-06	9.6664	GALNT1
SCFD1	2.18686e-10	0.0983547	0.155	0.053	7.33429e-06	9.66018	SCFD1
HSDL2	2.2187e-10	0.130066	0.103	0.027	7.44109e-06	9.6539	HSDL2
ARHGEF10L	2.27928e-10	0.125222	0.125	0.037	7.64426e-06	9.6422	ARHGEF10L
SSBP4	2.3027e-10	0.104834	0.179	0.062	7.72279e-06	9.63776	SSBP4
SNX17	2.44201e-10	0.0694289	0.28	0.125	8.19002e-06	9.61225	SNX17
SORT1	2.44884e-10	0.130417	0.113	0.035	8.21291e-06	9.61104	SORT1
CLK1	2.53799e-10	0.0681011	0.383	0.191	8.51191e-06	9.59551	CLK1
RPS9	2.57904e-10	-0.477069	0.955	0.894	8.6496e-06	9.58854	RPS9
TULP4	2.59465e-10	0.132606	0.145	0.05	8.70195e-06	9.58592	TULP4
RNF10	2.60241e-10	0.113226	0.179	0.067	8.72795e-06	9.58462	RNF10
C1orf162	2.63511e-10	-0.13635	0.62	0.383	8.83763e-06	9.5792	C1orf162
B3GNT5	2.64219e-10	0.139826	0.178	0.069	8.86137e-06	9.57804	B3GNT5
MDFIC	2.67784e-10	0.102696	0.165	0.059	8.98094e-06	9.57222	MDFIC
RBM33	2.70527e-10	0.10991	0.149	0.046	9.07293e-06	9.56779	RBM33
MIER1	2.76721e-10	0.0806992	0.198	0.07	9.28068e-06	9.55796	MIER1
GAL3ST4	2.90053e-10	0.0298513	0.317	0.148	9.72781e-06	9.53752	GAL3ST4
PCF11	2.9184e-10	0.114992	0.205	0.085	9.78772e-06	9.53486	PCF11
ANKRD10	2.92124e-10	0.0582244	0.308	0.143	9.79726e-06	9.53443	ANKRD10
CPT2	2.95248e-10	0.12845	0.101	0.027	9.90202e-06	9.52981	CPT2
UQCR10	2.99806e-10	-0.681694	0.767	0.652	1.00549e-05	9.52316	UQCR10
SIL1	2.99914e-10	0.0375619	0.226	0.089	1.00585e-05	9.523	SIL1
PITPNA	3.14369e-10	0.0858076	0.196	0.073	1.05433e-05	9.50256	PITPNA
MGA	3.16041e-10	0.114858	0.104	0.029	1.05994e-05	9.50026	MGA
CLEC4E	3.2313e-10	0.0989383	0.157	0.053	1.08371e-05	9.49062	CLEC4E
VBP1	3.32831e-10	0.0796113	0.171	0.059	1.11625e-05	9.47778	VBP1
GNA12	3.34673e-10	0.0707922	0.15	0.05	1.12243e-05	9.47538	GNA12
ATP6V1C1	3.36837e-10	0.0634326	0.273	0.112	1.12968e-05	9.47258	ATP6V1C1
IMPACT	3.36998e-10	0.113125	0.128	0.041	1.13022e-05	9.47237	IMPACT
DYRK1A	3.39228e-10	0.116738	0.131	0.042	1.1377e-05	9.46951	DYRK1A
ZZEF1	3.43949e-10	0.103479	0.105	0.029	1.15354e-05	9.46351	ZZEF1
CPSF2	3.47279e-10	0.0995628	0.15	0.05	1.1647e-05	9.45932	CPSF2
KATNBL1	3.48932e-10	0.123733	0.175	0.06	1.17025e-05	9.45726	KATNBL1
CSRP1	3.63039e-10	0.103501	0.196	0.075	1.21756e-05	9.44005	CSRP1
EID1	3.67884e-10	-0.0253314	0.504	0.268	1.23381e-05	9.43429	EID1
FUOM	3.74539e-10	-0.00979583	0.336	0.153	1.25613e-05	9.4265	FUOM
EDEM3	3.77893e-10	0.0841807	0.127	0.039	1.26738e-05	9.42263	EDEM3
LTC4S	3.80487e-10	-0.561695	0.216	0.22	1.27608e-05	9.41966	LTC4S
FGFR1OP2	3.82528e-10	0.0649279	0.247	0.1	1.28292e-05	9.41734	FGFR1OP2
HMGCL	3.88719e-10	0.0873859	0.146	0.048	1.30369e-05	9.41036	HMGCL
FAM208B	3.89348e-10	0.0956152	0.105	0.033	1.3058e-05	9.40966	FAM208B
DNM1L	3.90452e-10	0.0846555	0.168	0.057	1.3095e-05	9.40843	DNM1L
MIA3	3.99022e-10	0.0612129	0.139	0.05	1.33824e-05	9.399	MIA3
ERBIN	3.99129e-10	0.109032	0.213	0.088	1.3386e-05	9.39889	ERBIN
SIPA1	4.0376e-10	0.0814137	0.188	0.069	1.35413e-05	9.39388	SIPA1
NDUFS1	4.19744e-10	0.106045	0.152	0.047	1.40774e-05	9.37702	NDUFS1
DECR1	4.19842e-10	0.0333428	0.253	0.105	1.40807e-05	9.37691	DECR1
GTF3C1	4.2684e-10	0.116168	0.106	0.03	1.43154e-05	9.36974	GTF3C1
ZDHHC21	4.32135e-10	0.0942212	0.128	0.041	1.44929e-05	9.36438	ZDHHC21
LRMDA	4.38047e-10	0.108267	0.181	0.068	1.46912e-05	9.35848	LRMDA
NDUFA10	4.41929e-10	0.0391023	0.272	0.12	1.48214e-05	9.35465	NDUFA10
CNPY3	4.4896e-10	-0.0156051	0.453	0.239	1.50572e-05	9.34779	CNPY3
SCARB1	4.50225e-10	0.110472	0.178	0.063	1.50997e-05	9.34657	SCARB1
TRIM33	4.52346e-10	0.0912342	0.209	0.084	1.51708e-05	9.34453	TRIM33
ESYT1	4.53326e-10	0.0908211	0.17	0.061	1.52037e-05	9.34359	ESYT1
2022-09-11	4.53784e-10	0.0893582	0.206	0.08	1.5219e-05	9.34315	2022-09-11
GNB2	4.54479e-10	-0.00749481	0.451	0.242	1.52423e-05	9.34249	GNB2
CMTM3	4.55174e-10	-0.0232881	0.404	0.212	1.52656e-05	9.34182	CMTM3
MED10	4.55912e-10	0.106497	0.198	0.074	1.52904e-05	9.34112	MED10
EIF1AX	4.64643e-10	0.000742632	0.524	0.307	1.55832e-05	9.33288	EIF1AX
CWC22	4.77525e-10	0.121903	0.113	0.029	1.60152e-05	9.321	CWC22
TMEM165	4.89798e-10	0.0340385	0.36	0.172	1.64269e-05	9.30998	TMEM165
BAX	5.08265e-10	-0.695106	0.422	0.348	1.70462e-05	9.29391	BAX
RAB2A	5.09363e-10	-0.0161612	0.45	0.229	1.7083e-05	9.29297	RAB2A
LRRC59	5.11897e-10	0.0692457	0.203	0.08	1.7168e-05	9.29082	LRRC59
C1QC	5.12136e-10	-0.151513	0.885	0.703	1.7176e-05	9.29062	C1QC
TUBB	5.18756e-10	-0.0327532	0.632	0.396	1.7398e-05	9.28504	TUBB
NEK6	5.26789e-10	0.0237067	0.273	0.119	1.76674e-05	9.27836	NEK6
C1GALT1	5.28023e-10	0.101968	0.128	0.036	1.77088e-05	9.27735	C1GALT1
RNPEPL1	5.2885e-10	0.114497	0.184	0.069	1.77366e-05	9.27667	RNPEPL1
FAM210B	5.33494e-10	0.113489	0.166	0.059	1.78923e-05	9.27287	FAM210B
ADIRF	5.4124e-10	-0.449712	0.088	0.121	1.81521e-05	9.26661	ADIRF
PGP	5.45079e-10	0.103274	0.16	0.054	1.82809e-05	9.26354	PGP
SMC3	5.50111e-10	0.0755782	0.182	0.067	1.84496e-05	9.25955	SMC3
ACO2	5.54127e-10	0.0945784	0.211	0.08	1.85843e-05	9.25639	ACO2
PARP12	5.61575e-10	0.0965058	0.193	0.071	1.88341e-05	9.25059	PARP12
MRPS14	5.72878e-10	-0.470217	0.123	0.124	1.92132e-05	9.24194	MRPS14
GALNT7	5.92495e-10	0.100032	0.132	0.042	1.98711e-05	9.22732	GALNT7
MYO9B	6.03439e-10	0.0319595	0.348	0.159	2.02381e-05	9.21937	MYO9B
RNPEP	6.17793e-10	0.0702001	0.252	0.106	2.07195e-05	9.20916	RNPEP
IL4R	6.27242e-10	0.0965372	0.152	0.048	2.10364e-05	9.20256	IL4R
NFIC	6.29702e-10	0.0658781	0.257	0.115	2.11189e-05	9.20087	NFIC
AHR	6.38756e-10	0.127212	0.199	0.079	2.14226e-05	9.19466	AHR
FKBP4	6.40848e-10	0.0845058	0.167	0.063	2.14928e-05	9.19324	FKBP4
DNAJC21	6.50186e-10	0.0885644	0.151	0.051	2.18059e-05	9.18696	DNAJC21
TAF1D	6.56725e-10	0.0440538	0.318	0.147	2.20253e-05	9.18262	TAF1D
NXF1	6.58843e-10	0.124633	0.152	0.058	2.20963e-05	9.18122	NXF1
ZCCHC2	6.736e-10	0.0950758	0.158	0.055	2.25912e-05	9.1716	ZCCHC2
MAN1A2	6.85571e-10	0.102262	0.132	0.039	2.29927e-05	9.16395	MAN1A2
G3BP1	6.85619e-10	0.0618538	0.37	0.173	2.29943e-05	9.16392	G3BP1
RBM25	6.9281e-10	-0.0348143	0.502	0.282	2.32355e-05	9.15939	RBM25
TMEM106B	7.03869e-10	0.0976393	0.157	0.05	2.36063e-05	9.15251	TMEM106B
[truncated: 3,017 more rows]
