# Supplementary material for: Integrated Analysis of Single-Cell and Bulk RNA-Sequencing Reveals a Tissue-Resident Macrophage-Related Signature for Predicting Immunotherapy Response in Breast Cancer Patients
Source: Cancers (Basel). 2022 Nov 9;14(22):5506. doi: 10.3390/cancers14225506 (PMC9688720; doi:10.3390/cancers14225506)
Supplement: Supplementary file 1 [file cancers-14-05506-s001.zip › Table S4.xls]

## Sheet: RTM_1 signature
Table S4. RTM_1 signature derived from single-cell sequencing. Top 100 up-regulated marker genes.
p_val	avg_log2FC	pct.1	pct.2	p_val_adj	cluster	gene
7.73e-64	0.663574	0.848	0.501	2.59e-59	RTM_1	RNASE1
1.32e-68	0.670604	0.943	0.7	4.42e-64	RTM_1	DUSP1
3.11e-76	0.671913	0.554	0.215	1.04e-71	RTM_1	ALCAM
7.69e-51	0.673604	0.67	0.356	2.58e-46	RTM_1	LMNA
6.08e-80	0.674438	0.435	0.136	2.04e-75	RTM_1	ALDH1A1
6.94e-70	0.6819	0.862	0.484	2.33e-65	RTM_1	XIST
8.47e-68	0.682572	0.519	0.205	2.84e-63	RTM_1	ELL2
1.17e-71	0.683892	0.5	0.188	3.93e-67	RTM_1	PMP22
2.9e-75	0.683904	0.466	0.164	9.72e-71	RTM_1	SLAMF8
1.67e-44	0.705483	0.499	0.241	5.59e-40	RTM_1	IRF1
7.31e-71	0.707915	0.915	0.568	2.45e-66	RTM_1	TXNIP
8.48e-37	0.721431	0.315	0.127	2.84e-32	RTM_1	HSPA6
1.11e-91	0.725386	0.339	0.074	3.73e-87	RTM_1	HLA-DQB2
1.26e-71	0.726281	0.857	0.486	4.24e-67	RTM_1	LITAF
1.74e-62	0.72693	0.822	0.471	5.84e-58	RTM_1	HERPUD1
2.17e-65	0.728063	0.411	0.141	7.29e-61	RTM_1	INSIG1
3.96e-131	0.728363	1	0.97	1.33e-126	RTM_1	CD74
3.73e-47	0.730684	0.577	0.294	1.25e-42	RTM_1	HSPD1
8.55e-54	0.73599	0.369	0.135	2.87e-49	RTM_1	TSC22D1
3.01e-86	0.736795	0.585	0.222	1.01e-81	RTM_1	CPVL
1.62e-82	0.740667	0.738	0.337	5.44e-78	RTM_1	PLXDC2
8.87e-87	0.740995	0.373	0.097	2.97e-82	RTM_1	GPX3
1.02e-55	0.742695	0.45	0.187	3.41e-51	RTM_1	TFRC
7.32e-69	0.746912	0.37	0.117	2.45e-64	RTM_1	FAM129A
9.94e-84	0.754756	0.501	0.166	3.33e-79	RTM_1	HLA-DQA2
7.29e-42	0.757967	0.271	0.094	2.45e-37	RTM_1	PCNX4
3.01e-44	0.759249	0.766	0.485	1.01e-39	RTM_1	HNRNPU
1.42e-51	0.762248	0.892	0.655	4.75e-47	RTM_1	JUN
7.7e-93	0.774881	0.954	0.638	2.58e-88	RTM_1	CTSS
5.29e-150	0.775621	1	0.998	1.77e-145	RTM_1	MT-CO1
1.84e-74	0.780224	0.756	0.374	6.18e-70	RTM_1	OLR1
5.16e-93	0.780251	0.747	0.316	1.73e-88	RTM_1	FGL2
9.36e-73	0.78149	0.686	0.32	3.14e-68	RTM_1	HSPA5
1.65e-69	0.784668	0.565	0.246	5.53e-65	RTM_1	MAP3K2
9.74e-98	0.791037	0.692	0.277	3.27e-93	RTM_1	C3AR1
4.37e-81	0.79616	0.607	0.254	1.47e-76	RTM_1	LHFPL2
3.32e-80	0.811009	0.55	0.209	1.11e-75	RTM_1	C5AR1
8.5e-97	0.818832	0.49	0.148	2.85e-92	RTM_1	MRC1
7.8e-101	0.818936	0.969	0.693	2.62e-96	RTM_1	GLUL
1.06e-85	0.826486	0.703	0.318	3.55e-81	RTM_1	RASSF4
7.58e-59	0.829503	0.708	0.38	2.54e-54	RTM_1	ACP5
3.44e-61	0.831109	0.651	0.337	1.16e-56	RTM_1	TNFAIP3
3.64e-98	0.843452	0.709	0.301	1.22e-93	RTM_1	AKR1B1
2e-151	0.851854	1	0.996	6.7e-147	RTM_1	MT-CO3
3.2e-103	0.85759	0.611	0.221	1.07e-98	RTM_1	GAA
3.68e-66	0.862936	0.618	0.291	1.23e-61	RTM_1	HSPH1
2.95e-101	0.865506	0.875	0.461	9.89e-97	RTM_1	HLA-DMB
1.1e-73	0.870442	0.511	0.194	3.69e-69	RTM_1	SLC2A3
1.58e-116	0.873534	0.983	0.733	5.3e-112	RTM_1	C1QB
1.67e-106	0.874101	0.935	0.584	5.59e-102	RTM_1	CD81
5.67e-126	0.874377	0.993	0.792	1.9e-121	RTM_1	HLA-DPB1
6.94e-124	0.882053	0.999	0.793	2.33e-119	RTM_1	HLA-DPA1
1.99e-101	0.884692	0.996	0.848	6.69e-97	RTM_1	CTSD
3.71e-100	0.887048	0.744	0.322	1.24e-95	RTM_1	SLCO2B1
1.05e-99	0.897176	0.991	0.923	3.52e-95	RTM_1	NEAT1
3.18e-172	0.905614	1	0.982	1.07e-167	RTM_1	MT-ND4
5.62e-110	0.913397	0.958	0.634	1.88e-105	RTM_1	HLA-DQB1
6.05e-74	0.91635	0.978	0.846	2.03e-69	RTM_1	HSP90AA1
2.8e-119	0.918861	0.975	0.731	9.38e-115	RTM_1	UBC
3.38e-106	0.922294	0.54	0.164	1.13e-101	RTM_1	KLF2
4.41e-86	0.925451	0.642	0.274	1.48e-81	RTM_1	CHMP1B
4.63e-121	0.936621	0.757	0.291	1.55e-116	RTM_1	TMEM176A
2.51e-167	0.937523	0.994	0.887	8.4e-163	RTM_1	TPT1
1.49e-67	0.940484	0.895	0.653	4.98e-63	RTM_1	HSPA1A
3.86e-128	0.94176	0.99	0.779	1.29e-123	RTM_1	C1QA
1.96e-110	0.943087	0.677	0.26	6.57e-106	RTM_1	ALDH2
4.21e-123	0.948873	0.564	0.171	1.41e-118	RTM_1	HLA-DOA
6.63e-80	0.950273	0.798	0.435	2.22e-75	RTM_1	ZFAND5
1.55e-72	0.961247	0.792	0.446	5.19e-68	RTM_1	DNAJB1
8.96e-80	0.966491	0.65	0.29	3e-75	RTM_1	ATF3
1.84e-83	0.970193	0.742	0.376	6.17e-79	RTM_1	CD83
8.62e-94	0.994566	0.468	0.133	2.89e-89	RTM_1	CXCL9
1.94e-132	1.00559	0.994	0.836	6.5e-128	RTM_1	CTSB
8.77e-120	1.01628	0.59	0.192	2.94e-115	RTM_1	KCNMA1
3.5e-141	1.03946	0.955	0.45	1.17e-136	RTM_1	HLA-DRB5
5.55e-172	1.07274	0.999	0.929	1.86e-167	RTM_1	MT-CYB
3.33e-187	1.07479	0.996	0.924	1.12e-182	RTM_1	MT-ND1
6.25e-149	1.07682	0.734	0.242	2.1e-144	RTM_1	SERPING1
1.75e-105	1.07757	0.86	0.468	5.87e-101	RTM_1	FOSB
1.88e-177	1.07876	1	0.934	6.29e-173	RTM_1	HLA-DRA
4.22e-81	1.09273	0.791	0.436	1.41e-76	RTM_1	IER3
1.25e-114	1.0937	0.796	0.365	4.18e-110	RTM_1	NAMPT
2.83e-174	1.10198	1	0.906	9.5e-170	RTM_1	MT-ND3
8.42e-145	1.1035	0.976	0.708	2.82e-140	RTM_1	CTSZ
6.03e-90	1.11341	0.493	0.169	2.02e-85	RTM_1	RANBP2
1.96e-128	1.11478	0.84	0.394	6.57e-124	RTM_1	A2M
1.18e-131	1.1205	0.865	0.414	3.97e-127	RTM_1	FCGR2A
4.34e-175	1.15027	0.683	0.183	1.46e-170	RTM_1	C2
2.85e-158	1.16193	0.739	0.248	9.55e-154	RTM_1	MTRNR2L12
1.02e-112	1.17848	0.784	0.381	3.42e-108	RTM_1	NR4A2
2.91e-163	1.18907	0.883	0.355	9.76e-159	RTM_1	TMEM176B
3.65e-160	1.19588	0.862	0.346	1.22e-155	RTM_1	CFD
6.47e-115	1.20413	0.651	0.24	2.17e-110	RTM_1	ZNF331
1.75e-132	1.22223	0.804	0.361	5.87e-128	RTM_1	ATP1B3
1.15e-171	1.22577	0.984	0.599	3.84e-167	RTM_1	LYZ
8.49e-167	1.22931	0.979	0.6	2.85e-162	RTM_1	HLA-DQA1
1.91e-161	1.39434	0.91	0.447	6.42e-157	RTM_1	SOD2
6.48e-229	1.39964	1	0.933	2.17e-224	RTM_1	MT-ATP6
8.06e-256	1.71513	0.96	0.423	2.7e-251	RTM_1	FCGR3A
0	2.16046	0.919	0.246	0	RTM_1	MTRNR2L8

## Sheet: RTM_2 signature
Table S4. RTM_2 signature derived from single-cell sequencing. Top 100 up-regulated marker genes
p_val	avg_log2FC	pct.1	pct.2	p_val_adj	cluster	gene
4.87e-31	0.531059	0.871	0.559	1.63e-26	RTM_2	UQCRB
8.61e-16	0.532088	0.754	0.494	2.89e-11	RTM_2	MT2A
4.16e-14	0.540816	0.773	0.557	1.4e-09	RTM_2	FABP5
3e-44	0.541799	0.76	0.363	1e-39	RTM_2	MT-ND4L
5.03e-48	0.542403	0.568	0.225	1.69e-43	RTM_2	NCF2
5.01e-57	0.545578	0.613	0.228	1.68e-52	RTM_2	VAMP5
3.12e-45	0.548606	0.67	0.298	1.05e-40	RTM_2	PLEKHO1
1.41e-42	0.548677	0.652	0.296	4.73e-38	RTM_2	SERPINB1
7.02e-36	0.550988	0.252	0.072	2.36e-31	RTM_2	RARRES1
1.95e-58	0.554154	0.484	0.156	6.53e-54	RTM_2	DRAM1
9.25e-22	0.574021	1	0.999	3.1e-17	RTM_2	FTH1
1.12e-85	0.577595	0.348	0.063	3.77e-81	RTM_2	IL18BP
1.83e-18	0.578072	0.742	0.528	6.15e-14	RTM_2	CTSC
2.48e-42	0.578411	0.773	0.394	8.33e-38	RTM_2	ATP6AP2
4.23e-54	0.580031	0.486	0.164	1.42e-49	RTM_2	TAP1
1.08e-32	0.581713	0.984	0.893	3.62e-28	RTM_2	GAPDH
4.86e-50	0.585758	0.627	0.256	1.63e-45	RTM_2	FLNA
9.02e-62	0.586634	0.555	0.19	3.02e-57	RTM_2	RALA
9.28e-50	0.586765	0.328	0.09	3.11e-45	RTM_2	TREM1
8.32e-41	0.588922	0.836	0.47	2.79e-36	RTM_2	MGST3
5.64e-48	0.593423	0.463	0.164	1.89e-43	RTM_2	GBP4
7.82e-58	0.595813	0.58	0.212	2.62e-53	RTM_2	RAB13
2.52e-48	0.597863	0.393	0.125	8.47e-44	RTM_2	ADAMDEC1
1e-52	0.598569	0.73	0.321	3.36e-48	RTM_2	RAP1B
1.5e-39	0.603343	0.965	0.733	5.05e-35	RTM_2	CTSZ
1.8e-49	0.604481	0.295	0.077	6.02e-45	RTM_2	SLAMF7
9.23e-36	0.60523	0.449	0.185	3.1e-31	RTM_2	CCL5
7.85e-63	0.608599	0.447	0.13	2.63e-58	RTM_2	CD40
1.09e-48	0.615808	0.998	0.998	3.67e-44	RTM_2	MT-CO2
1.52e-49	0.629304	0.998	0.996	5.11e-45	RTM_2	MT-CO3
2.52e-47	0.635754	0.926	0.497	8.46e-43	RTM_2	HLA-DRB5
2.74e-54	0.648218	0.758	0.347	9.19e-50	RTM_2	VDAC1
4.16e-37	0.650772	0.84	0.515	1.39e-32	RTM_2	CTSH
2.06e-35	0.65594	0.932	0.722	6.91e-31	RTM_2	GLUL
3.23e-45	0.657695	0.99	0.915	1.08e-40	RTM_2	MT-ND3
2.26e-52	0.659841	0.402	0.124	7.57e-48	RTM_2	IL32
9.44e-56	0.664382	0.266	0.056	3.17e-51	RTM_2	HK2
3.95e-56	0.675056	0.32	0.078	1.32e-51	RTM_2	IL7R
8.78e-61	0.685191	0.998	0.998	2.95e-56	RTM_2	MT-CO1
2.33e-44	0.689656	0.68	0.313	7.81e-40	RTM_2	CLEC2B
1.5e-41	0.693718	0.803	0.476	5.04e-37	RTM_2	STAT1
3.19e-38	0.699752	0.984	0.851	1.07e-33	RTM_2	CTSB
2.67e-67	0.705231	0.998	0.984	8.96e-63	RTM_2	MT-ND4
1.65e-38	0.711012	0.85	0.495	5.52e-34	RTM_2	SOD2
2.01e-32	0.713187	0.486	0.216	6.74e-28	RTM_2	SCD
8.6e-68	0.719315	0.355	0.081	2.88e-63	RTM_2	CD24
6.04e-52	0.721842	0.549	0.207	2.02e-47	RTM_2	BCL2A1
6.5e-76	0.724839	0.566	0.176	2.18e-71	RTM_2	SLAMF8
6.37e-32	0.730785	0.715	0.387	2.14e-27	RTM_2	PLEK
1.32e-66	0.731305	0.789	0.339	4.41e-62	RTM_2	LCP1
3.92e-53	0.732166	0.949	0.707	1.32e-48	RTM_2	MT-ND5
3.66e-55	0.732714	0.992	0.936	1.23e-50	RTM_2	MT-CYB
3.8e-51	0.741361	0.943	0.667	1.28e-46	RTM_2	CTSS
4.05e-62	0.749226	0.533	0.181	1.36e-57	RTM_2	BCAT1
4.2e-53	0.754898	0.615	0.252	1.41e-48	RTM_2	BASP1
3.74e-53	0.766582	0.77	0.373	1.25e-48	RTM_2	LILRB4
1.28e-64	0.777747	0.691	0.282	4.29e-60	RTM_2	SERPINA1
1.85e-50	0.778463	0.861	0.483	6.19e-46	RTM_2	CD44
1.74e-56	0.783487	0.723	0.347	5.85e-52	RTM_2	LAP3
2.22e-81	0.787379	0.594	0.182	7.44e-77	RTM_2	ATF5
1.91e-55	0.794992	0.848	0.466	6.4e-51	RTM_2	PGK1
1e-40	0.805692	0.877	0.601	3.37e-36	RTM_2	GPNMB
3.52e-49	0.812406	0.895	0.558	1.18e-44	RTM_2	LGALS3
1.95e-80	0.818162	0.377	0.08	6.52e-76	RTM_2	GBP5
1.13e-88	0.828838	0.303	0.046	3.8e-84	RTM_2	MUCL1
5.2e-13	0.836734	0.385	0.213	1.74e-08	RTM_2	MT1X
4.28e-64	0.848972	0.996	0.939	1.44e-59	RTM_2	MT-ATP6
5.85e-51	0.88879	0.873	0.515	1.96e-46	RTM_2	C15orf48
1.59e-58	0.89022	0.836	0.42	5.35e-54	RTM_2	ANXA1
8.18e-70	0.895783	0.764	0.33	2.74e-65	RTM_2	TMEM176A
1.27e-64	0.899527	0.568	0.204	4.26e-60	RTM_2	LTA4H
1.9e-68	0.905481	0.85	0.461	6.36e-64	RTM_2	BRI3
2.84e-66	0.92714	0.654	0.252	9.52e-62	RTM_2	AC020656.1
2.97e-61	0.940637	0.953	0.636	9.97e-57	RTM_2	HLA-DQA1
1.92e-68	0.94857	0.959	0.781	6.44e-64	RTM_2	PRDX1
4.12e-66	0.958815	0.309	0.064	1.38e-61	RTM_2	CXCL11
1.7e-100	0.964276	0.572	0.151	5.7e-96	RTM_2	NR1H3
2.99e-93	0.965397	0.49	0.12	1e-88	RTM_2	WARS
5.59e-90	0.96674	0.502	0.127	1.88e-85	RTM_2	ERO1A
8.39e-79	0.985612	0.865	0.402	2.82e-74	RTM_2	TMEM176B
9.31e-95	1.03111	0.957	0.594	3.12e-90	RTM_2	ITGB2
1.49e-87	1.10304	0.715	0.256	4.98e-83	RTM_2	IL4I1
3.69e-79	1.11189	0.773	0.349	1.24e-74	RTM_2	SNX10
1.09e-83	1.11287	0.615	0.204	3.67e-79	RTM_2	PPA1
3.52e-81	1.22563	0.871	0.463	1.18e-76	RTM_2	LDHA
7.98e-66	1.26768	0.934	0.779	2.68e-61	RTM_2	S100A10
1.78e-40	1.30392	0.926	0.739	5.96e-36	RTM_2	CSTB
2.17e-68	1.33084	0.408	0.109	7.28e-64	RTM_2	S100A8
7.71e-115	1.33122	0.98	0.83	2.59e-110	RTM_2	VIM
5.51e-85	1.35687	0.539	0.157	1.85e-80	RTM_2	CD52
3.3e-61	1.44913	0.805	0.502	1.11e-56	RTM_2	FN1
9.35e-95	1.58328	0.631	0.208	3.14e-90	RTM_2	GBP1
4.21e-82	1.59324	0.543	0.169	1.41e-77	RTM_2	MMP9
2.54e-119	1.60824	0.346	0.045	8.52e-115	RTM_2	CHI3L1
6.44e-45	1.68929	0.678	0.364	2.16e-40	RTM_2	PLIN2
4.88e-41	1.80436	0.443	0.188	1.64e-36	RTM_2	CXCL10
4.3e-216	1.96463	0.537	0.058	1.44e-211	RTM_2	MARCO
3.54e-143	1.99126	0.99	0.631	1.19e-138	RTM_2	LYZ
1.4e-189	2.27921	0.674	0.136	4.71e-185	RTM_2	FBP1
9.71e-138	2.47201	0.605	0.143	3.26e-133	RTM_2	CXCL9

## Sheet: RTM_3 signature
Table S4. RTM_3 signature derived from single-cell sequencing. All up-regulated marker genes
p_val	avg_log2FC	pct.1	pct.2	p_val_adj	cluster	gene
1.54e-12	0.502082	0.356	0.155	5.17e-08	RTM_3	PRDM1
1.49e-13	0.503353	0.614	0.343	5e-09	RTM_3	CLEC2B
1.62e-09	0.508861	0.748	0.526	5.45e-05	RTM_3	SOD2
2.69e-19	0.509094	0.287	0.091	9.01e-15	RTM_3	AC016831.5
2.4e-08	0.509212	0.55	0.338	0.000804483	RTM_3	HSPD1
4.91e-11	0.509659	0.342	0.162	1.65e-06	RTM_3	PNN
3.59e-26	0.515088	0.312	0.084	1.21e-21	RTM_3	APOBEC3G
9.94e-12	0.519138	0.619	0.371	3.33e-07	RTM_3	REL
1.08e-14	0.519228	0.446	0.208	3.62e-10	RTM_3	AC020916.1
1.94e-23	0.523999	1	0.995	6.52e-19	RTM_3	MALAT1
2.13e-13	0.529518	0.337	0.145	7.13e-09	RTM_3	ZNF292
4.61e-20	0.53593	1	0.985	1.55e-15	RTM_3	MT-ND4
2.64e-12	0.537195	0.847	0.587	8.86e-08	RTM_3	HSPA8
2.15e-16	0.541614	0.386	0.158	7.22e-12	RTM_3	RAC2
1.4e-13	0.547829	0.272	0.104	4.7e-09	RTM_3	GABPB1-AS1
1.21e-14	0.54888	0.46	0.219	4.05e-10	RTM_3	RARRES3
2.77e-18	0.551491	0.441	0.186	9.29e-14	RTM_3	PPP1R12A
6.35e-14	0.555971	0.911	0.726	2.13e-09	RTM_3	MT-ND5
1.72e-21	0.556033	0.99	0.903	5.77e-17	RTM_3	TPT1
2.49e-11	0.576194	0.946	0.867	8.35e-07	RTM_3	HSP90AA1
1.15e-13	0.576209	0.441	0.214	3.86e-09	RTM_3	EZR
7.8e-25	0.584929	0.257	0.064	2.62e-20	RTM_3	PTPN7
2.38e-19	0.585072	0.401	0.154	7.97e-15	RTM_3	FAM129A
2.78e-17	0.585941	0.322	0.12	9.32e-13	RTM_3	BTN3A2
1.22e-18	0.587492	0.381	0.147	4.08e-14	RTM_3	PPP2R5C
6.92e-24	0.591592	0.381	0.127	2.32e-19	RTM_3	IL2RG
4.44e-19	0.599491	0.356	0.128	1.49e-14	RTM_3	KIAA1551
1.83e-19	0.602845	0.312	0.105	6.15e-15	RTM_3	GBP5
5.26e-15	0.608953	0.673	0.384	1.76e-10	RTM_3	TNFAIP3
1.15e-18	0.610822	0.426	0.176	3.85e-14	RTM_3	ADGRE5
3.1e-29	0.635538	0.262	0.059	1.04e-24	RTM_3	AC058791.1
2.71e-20	0.640429	0.975	0.921	9.1e-16	RTM_3	MT-ND3
2.03e-20	0.659345	0.564	0.263	6.8e-16	RTM_3	ANKRD12
9.74e-18	0.67424	0.673	0.371	3.27e-13	RTM_3	SRSF7
1.68e-17	0.679841	0.837	0.542	5.64e-13	RTM_3	XIST
5.29e-26	0.69349	0.589	0.244	1.77e-21	RTM_3	EVL
2.96e-23	0.697701	0.322	0.1	9.92e-19	RTM_3	PIK3IP1
2.96e-33	0.701146	0.327	0.077	9.91e-29	RTM_3	STK17A
4.46e-27	0.703178	0.995	0.94	1.5e-22	RTM_3	MT-CYB
8.48e-21	0.704531	0.698	0.36	2.84e-16	RTM_3	MTRNR2L8
3.09e-19	0.706779	0.351	0.127	1.04e-14	RTM_3	BIRC3
1.1e-20	0.736567	0.926	0.621	3.69e-16	RTM_3	TXNIP
2.26e-60	0.738527	0.317	0.043	7.57e-56	RTM_3	ACAP1
4.75e-19	0.742222	0.767	0.463	1.59e-14	RTM_3	PTPRC
2.07e-16	0.783221	0.787	0.497	6.93e-12	RTM_3	ZFP36L2
6.17e-21	0.818748	0.777	0.445	2.07e-16	RTM_3	CXCR4
1.74e-17	0.820442	0.787	0.499	5.82e-13	RTM_3	DNAJB1
3.01e-41	0.844028	0.426	0.108	1.01e-36	RTM_3	CYTIP
4.49e-24	0.846061	0.757	0.394	1.51e-19	RTM_3	TSC22D3
1.37e-29	0.852265	0.99	0.944	4.6e-25	RTM_3	MT-ATP6
6.03e-143	0.916156	0.307	0.012	2.02e-138	RTM_3	CD3G
1.84e-121	0.929155	0.257	0.01	6.17e-117	RTM_3	CTSW
5.76e-13	0.946261	0.396	0.188	1.93e-08	RTM_3	CXCL9
1.14e-56	0.969389	0.658	0.178	3.82e-52	RTM_3	CD52
2.26e-35	0.97489	0.975	0.645	7.58e-31	RTM_3	BTG1
5.54e-108	1.03229	0.317	0.022	1.86e-103	RTM_3	ETS1
1.99e-122	1.04344	0.342	0.021	6.69e-118	RTM_3	CST7
8.28e-85	1.14955	0.302	0.027	2.78e-80	RTM_3	CD7
5e-54	1.16954	0.455	0.097	1.68e-49	RTM_3	CD69
5.32e-65	1.22272	0.342	0.047	1.78e-60	RTM_3	LTB
7.03e-162	1.28374	0.416	0.023	2.36e-157	RTM_3	TRAC
5.3e-183	1.39459	0.366	0.013	1.78e-178	RTM_3	TRBC1
2.13e-149	1.39561	0.322	0.013	7.13e-145	RTM_3	GZMK
2.85e-218	1.42359	0.49	0.022	9.57e-214	RTM_3	CD2
7.4e-78	1.44457	0.495	0.087	2.48e-73	RTM_3	IL7R
1.46e-171	1.50645	0.426	0.023	4.9e-167	RTM_3	TRBC2
4.22e-220	1.61133	0.52	0.026	1.42e-215	RTM_3	CD3D
1.19e-248	1.6437	0.455	0.013	3.99e-244	RTM_3	GZMA
9.71e-157	1.75803	0.465	0.033	3.25e-152	RTM_3	NKG7
3.73e-105	1.8479	0.678	0.13	1.25e-100	RTM_3	IL32
1.69e-85	1.90491	0.738	0.189	5.68e-81	RTM_3	CCL5
9.47e-154	3.12431	0.322	0.012	3.17e-149	RTM_3	GNLY

## Sheet: RTM_4 signature
Table S4. RTM_4 signature derived from single-cell sequencing. Top 100 up-regulated marker genes
p_val	avg_log2FC	pct.1	pct.2	p_val_adj	cluster	gene
1.43e-14	0.839724	0.534	0.282	4.81e-10	RTM_4	CPVL
1.59e-14	0.842334	0.422	0.193	5.33e-10	RTM_4	CPEB4
5.4e-25	0.842473	0.342	0.095	1.81e-20	RTM_4	ARRDC2
1.48e-18	0.842502	0.702	0.412	4.97e-14	RTM_4	BLVRB
9.36e-16	0.843994	0.491	0.238	3.14e-11	RTM_4	ZFHX3
2.17e-13	0.847551	0.627	0.383	7.28e-09	RTM_4	CSF1R
1.32e-14	0.849319	0.441	0.217	4.43e-10	RTM_4	IQGAP2
3.2e-10	0.849588	0.696	0.45	1.07e-05	RTM_4	NR4A2
6.86e-30	0.855455	1	0.904	2.3e-25	RTM_4	TPT1
1.03e-34	0.859963	0.317	0.065	3.44e-30	RTM_4	PDGFC
2.88e-19	0.864715	0.565	0.271	9.65e-15	RTM_4	PRNP
8.9e-45	0.865285	0.261	0.034	2.98e-40	RTM_4	GNG2
1.01e-19	0.865373	0.286	0.079	3.4e-15	RTM_4	CD36
2.66e-17	0.86974	0.522	0.251	8.93e-13	RTM_4	FRMD4B
8.94e-13	0.870523	0.304	0.122	3e-08	RTM_4	IRS2
3.64e-20	0.873433	0.665	0.345	1.22e-15	RTM_4	C3AR1
1.02e-30	0.87463	0.335	0.078	3.42e-26	RTM_4	PELI1
1.52e-18	0.885199	0.683	0.389	5.09e-14	RTM_4	SNX6
3.04e-21	0.901894	0.882	0.651	1.02e-16	RTM_4	FCGRT
4.73e-15	0.908232	0.646	0.389	1.59e-10	RTM_4	FGL2
1.24e-12	0.923595	0.683	0.469	4.14e-08	RTM_4	JUND
2.12e-17	0.926331	0.286	0.09	7.12e-13	RTM_4	COLEC12
4.05e-15	0.934768	0.739	0.522	1.36e-10	RTM_4	MCL1
1.17e-27	0.939883	0.435	0.136	3.91e-23	RTM_4	ETS2
6e-30	0.94649	0.298	0.064	2.01e-25	RTM_4	SLC18B1
9.14e-27	0.950886	0.342	0.09	3.07e-22	RTM_4	RGL1
9.55e-22	0.952408	0.317	0.095	3.2e-17	RTM_4	ME1
9.57e-25	0.955056	0.845	0.533	3.21e-20	RTM_4	PABPC1
1.11e-12	0.96724	0.41	0.199	3.71e-08	RTM_4	CITED2
2.55e-26	0.968784	0.832	0.466	8.57e-22	RTM_4	A2M
9.99e-16	0.971639	0.739	0.502	3.35e-11	RTM_4	ZFP36L2
9.43e-33	0.97237	0.994	0.813	3.16e-28	RTM_4	C1QA
5.91e-19	0.976922	0.503	0.226	1.98e-14	RTM_4	NRP1
1.01e-16	0.986422	0.41	0.178	3.38e-12	RTM_4	FKBP5
9.2e-15	0.993438	0.845	0.677	3.09e-10	RTM_4	KLF6
2.31e-23	0.997774	0.429	0.153	7.75e-19	RTM_4	EPS15
2.83e-34	1.00684	0.329	0.069	9.5e-30	RTM_4	GAS6
2.75e-34	1.01021	0.994	0.936	9.24e-30	RTM_4	MT-ND1
8.14e-13	1.03225	0.54	0.336	2.73e-08	RTM_4	RBPJ
1.17e-24	1.0795	0.547	0.232	3.92e-20	RTM_4	MPEG1
8.3e-24	1.09295	0.758	0.443	2.78e-19	RTM_4	CEBPB
5e-40	1.09707	0.342	0.067	1.68e-35	RTM_4	SESN1
8.01e-23	1.09966	0.466	0.183	2.69e-18	RTM_4	ALDH1A1
1.83e-32	1.10033	0.404	0.106	6.14e-28	RTM_4	EMB
1.65e-19	1.10253	0.857	0.627	5.53e-15	RTM_4	TXNIP
1.84e-35	1.1093	0.41	0.103	6.19e-31	RTM_4	MTSS1
7.32e-14	1.11683	0.466	0.239	2.45e-09	RTM_4	PMP22
4.1e-27	1.12183	0.491	0.179	1.38e-22	RTM_4	CD302
6.69e-23	1.14442	0.925	0.74	2.24e-18	RTM_4	DUSP1
1.68e-25	1.14573	0.882	0.608	5.62e-21	RTM_4	MAFB
2.61e-29	1.16289	0.497	0.178	8.76e-25	RTM_4	AP2A2
7.61e-26	1.17216	0.913	0.668	2.55e-21	RTM_4	ZFP36L1
3.01e-32	1.17259	0.354	0.083	1.01e-27	RTM_4	NLRP3
2.88e-34	1.18385	0.932	0.532	9.65e-30	RTM_4	HLA-DRB5
1.07e-23	1.18633	0.609	0.275	3.58e-19	RTM_4	VSIG4
1.93e-24	1.1892	0.783	0.432	6.48e-20	RTM_4	CFD
3.55e-46	1.19101	0.379	0.072	1.19e-41	RTM_4	WWP1
2.11e-38	1.19102	0.938	0.613	7.07e-34	RTM_4	MS4A6A
4.24e-14	1.19509	0.696	0.458	1.42e-09	RTM_4	TRA2B
2.26e-20	1.19596	0.46	0.186	7.57e-16	RTM_4	ARRDC3
1.39e-39	1.20461	0.994	0.921	4.67e-35	RTM_4	MT-ND3
3.04e-37	1.20642	0.584	0.191	1.02e-32	RTM_4	GPR34
1.97e-17	1.23107	0.41	0.166	6.62e-13	RTM_4	DUSP6
2.29e-56	1.23595	0.41	0.071	7.67e-52	RTM_4	KLF9
1.71e-25	1.24027	0.615	0.279	5.74e-21	RTM_4	KLF4
8.61e-29	1.27227	0.745	0.39	2.89e-24	RTM_4	SLCO2B1
2.99e-14	1.2937	0.46	0.229	1e-09	RTM_4	TFRC
3.75e-71	1.3315	0.335	0.036	1.26e-66	RTM_4	CD209
1.35e-25	1.34275	0.77	0.469	4.54e-21	RTM_4	KCTD12
2.73e-51	1.34354	1	0.923	9.16e-47	RTM_4	MT-ND2
2.45e-22	1.35936	0.702	0.402	8.23e-18	RTM_4	ZFP36
2.87e-67	1.42195	0.385	0.051	9.64e-63	RTM_4	CXCL12
9.9e-202	1.4388	0.292	0.003	3.32e-197	RTM_4	MAMDC2
3.23e-30	1.43919	0.969	0.843	1.08e-25	RTM_4	FOS
2.48e-38	1.45239	0.795	0.403	8.31e-34	RTM_4	MS4A4A
1.98e-21	1.45536	0.677	0.375	6.63e-17	RTM_4	EGR1
3.82e-35	1.46936	0.764	0.397	1.28e-30	RTM_4	TSC22D3
4.35e-49	1.46962	0.938	0.599	1.46e-44	RTM_4	MS4A7
1.92e-24	1.47084	0.671	0.363	6.44e-20	RTM_4	PLTP
4.55e-26	1.47213	0.54	0.225	1.52e-21	RTM_4	KLF2
3.79e-36	1.58012	0.832	0.538	1.27e-31	RTM_4	DAB2
3.39e-33	1.60482	0.876	0.556	1.14e-28	RTM_4	RNASE1
4.66e-16	1.64167	0.273	0.093	1.56e-11	RTM_4	EMP1
4.2e-37	1.66067	0.894	0.55	1.41e-32	RTM_4	LGMN
1.9e-111	1.73092	0.547	0.063	6.36e-107	RTM_4	IGF1
4.41e-62	1.76556	0.509	0.101	1.48e-57	RTM_4	MAN1A1
1.89e-53	1.76863	0.764	0.302	6.33e-49	RTM_4	CD163
9.87e-49	1.78534	0.776	0.333	3.31e-44	RTM_4	CEBPD
3.76e-51	1.81151	0.745	0.27	1.26e-46	RTM_4	STAB1
7.18e-89	1.92344	0.497	0.068	2.41e-84	RTM_4	LILRB5
2.26e-32	1.99841	0.311	0.068	7.56e-28	RTM_4	CCL13
3.29e-52	2.04446	0.627	0.198	1.1e-47	RTM_4	MRC1
8.69e-13	2.08534	0.28	0.11	2.91e-08	RTM_4	CCL18
4.05e-112	2.25385	0.795	0.157	1.36e-107	RTM_4	FOLR2
4.76e-90	2.38347	0.845	0.225	1.6e-85	RTM_4	SLC40A1
1.72e-92	2.50117	0.851	0.242	5.76e-88	RTM_4	MAF
5.49e-268	2.93019	0.373	0.003	1.84e-263	RTM_4	LYVE1
3.5e-228	3.42144	0.727	0.053	1.17e-223	RTM_4	F13A1
5.74e-141	3.48869	0.981	0.249	1.93e-136	RTM_4	SELENOP
1.23e-202	4.10458	0.814	0.088	4.14e-198	RTM_4	PDK4
