# Supplementary material for: Integrated Analysis of Single-Cell and Bulk RNA-Sequencing Reveals a Tissue-Resident Macrophage-Related Signature for Predicting Immunotherapy Response in Breast Cancer Patients
Source: Cancers (Basel). 2022 Nov 9;14(22):5506. doi: 10.3390/cancers14225506 (PMC9688720; doi:10.3390/cancers14225506)
Supplement: Supplementary file 1 [file cancers-14-05506-s001.zip › Table S5.xls]

## Sheet: Sheet1
Table S5 The identified RTM.Sig in this study
PDGFC
CCL13
EMP1
RNASE1
PMP22
MTSS1
GAS6
MCL1
FGL2
CCL18
RBPJ
MPEG1
CEBPB
LGMN
FCGRT
ZFP36
CXCL12
CPEB4
ZFHX3
CPVL
CSF1R
RARRES1
PRNP
CD36
IRS2
