# Supplementary material for: Integrated Analysis of Single-Cell and Bulk RNA-Sequencing Reveals a Tissue-Resident Macrophage-Related Signature for Predicting Immunotherapy Response in Breast Cancer Patients
Source: Cancers (Basel). 2022 Nov 9;14(22):5506. doi: 10.3390/cancers14225506 (PMC9688720; doi:10.3390/cancers14225506)
Supplement: Supplementary file 1 [file cancers-14-05506-s001.zip › Table S6.xls]

## Sheet: Sheet1
Table S6. The website summary of all R packages used in the study.
R packages	URL link
cancerclass	http://www.bioconductor.org/packages/release/bioc/html/cancerclass.html
cancerdata	http://www.bioconductor.org/packages/release/data/experiment/html/cancerdata
clusterProfiler	http://www.bioconductor.org/packages/release/bioc/html/clusterProfiler.html
dplyr	https://CRAN.R-project.org/package=dplyr
GEOquery	http://www.bioconductor.org/packages/release/bioc/html/GEOquery.html
ggplot2	https://ggplot2.tidyverse.org/
ggpubr	https://CRAN.R-project.org/package=ggpubr
ggrepel	https://CRAN.R-project.org/package=ggrepel
GSVA	http://www.bioconductor.org/packages/devel/bioc/vignettes/GSVA/inst/doc/GSVA
monocle	http://bioconductor.org/packages/release/bioc/html/monocle.html
msigdbr	https://CRAN.R-project.org/package=msigdbr
org.Hs.eg.db	http://bioconductor.riken.jp/packages/3.0/data/annotation/html/org.Hs.eg.db.html
patchwork	https://CRAN.R-project.org/package=patchwork
pheatmap	https://CRAN.R-project.org/package=pheatmap
pROC	https://cran.r-project.org/web/packages/pROC/index.html
RColorBrewer	https://CRAN.R-project.org/package=RColorBrewer
Seurat	https://satijalab.org/seurat and https://github.com/mojaveazure/seurat-object
survival	https://cran.r-project.org/web/packages/survival/index.html
survminer	https://CRAN.R-project.org/package=survminer
tidyverse	https://github.com/tidyverse/tidyverse
