# Supplementary material for: Integrated Analysis of Single-Cell and Bulk RNA-Sequencing Reveals a Tissue-Resident Macrophage-Related Signature for Predicting Immunotherapy Response in Breast Cancer Patients
Source: Cancers (Basel). 2022 Nov 9;14(22):5506. doi: 10.3390/cancers14225506 (PMC9688720; doi:10.3390/cancers14225506)
Supplement: Supplementary file 1 [file cancers-14-05506-s001.zip › Table S7.xlsx]

## Sheet: Enrichment of RTM_1 signature 
Enrichment of RTM_1 signature genes in responders
SYMBOL	RANK IN GENE LIST	RANK METRIC SCORE	RUNNING ES	CORE ENRICHMENT
HLA-DQB2	595	0.434927	0.0342689	Yes
CXCL9	742	0.408843	0.0737683	Yes
HLA-DQA2	1114	0.362806	0.104564	Yes
IRF1	2548	0.269473	0.107035	Yes
HLA-DOA	2599	0.267677	0.133699	Yes
HLA-DQB1	2808	0.259008	0.156687	Yes
SLAMF8	3506	0.239578	0.169055	Yes
MTRNR2L12	3828	0.230907	0.187158	Yes
HLA-DQA1	3991	0.226353	0.207596	Yes
ALDH2	4206	0.220816	0.226547	Yes
C1QA	4362	0.216648	0.24611	Yes
HLA-DMB	4438	0.21494	0.266907	Yes
HLA-DRB5	4448	0.214717	0.288844	Yes
FGL2	4624	0.210115	0.307382	Yes
C1QB	5039	0.200537	0.320721	Yes
HLA-DPB1	5128	0.198517	0.339598	Yes
LYZ	5178	0.197381	0.359047	Yes
C2	5216	0.196747	0.378641	Yes
TNFAIP3	5702	0.185378	0.389169	Yes
HLA-DPA1	6416	0.170511	0.394147	Yes
CD83	6563	0.168022	0.408864	Yes
CTSS	7386	0.15282	0.410101	Yes
CD74	8032	0.142812	0.413428	Yes
HLA-DRA	8448	0.135831	0.42009	Yes
XIST	9004	0.126889	0.423365	Yes
OLR1	9100	0.125855	0.434642	Yes
ALDH1A1	10650	0.103361	0.417974	Yes
RASSF4	10691	0.102817	0.427849	Yes
C3AR1	10907	0.100218	0.434372	Yes
KCNMA1	10912	0.100175	0.444611	Yes
TMEM176B	11454	0.0935318	0.444699	Yes
ACP5	11815	0.0891005	0.447523	Yes
SERPING1	11868	0.0885781	0.455721	Yes
TMEM176A	12027	0.0868344	0.461872	Yes
FCGR3A	12154	0.0853361	0.468433	Yes
MRC1	12280	0.0838788	0.474861	Yes
SOD2	12307	0.083563	0.483002	Yes
SLCO2B1	12396	0.082491	0.48994	Yes
CPVL	12411	0.0823294	0.498165	Yes
GLUL	12956	0.0763796	0.496436	Yes
HSPD1	13536	0.070335	0.493468	Yes
FAM129A	13656	0.06905	0.498476	Yes

## Sheet: Enrichment of RTM_2 signature 
Enrichment of RTM_2 signature genes in responders
SYMBOL	RANK IN GENE LIST	RANK METRIC SCORE	RUNNING ES	CORE ENRICHMENT
CXCL11	407	0.477622	0.0271164	Yes
CXCL10	426	0.47397	0.0608276	Yes
CD52	475	0.45838	0.0928906	Yes
CCL5	556	0.441388	0.12317	Yes
GBP5	608	0.432607	0.153329	Yes
CXCL9	742	0.408843	0.180338	Yes
ADAMDEC1	818	0.398015	0.207591	Yes
BCL2A1	935	0.382329	0.232995	Yes
GBP4	1002	0.373989	0.258682	Yes
TAP1	1292	0.344429	0.278316	Yes
SLAMF7	1918	0.299346	0.288791	Yes
LILRB4	1973	0.29617	0.309102	Yes
GBP1	2438	0.273801	0.320581	Yes
IL4I1	2618	0.2666	0.336566	Yes
NR1H3	2691	0.263852	0.35424	Yes
PLEK	2745	0.26152	0.372081	Yes
WARS	2951	0.254024	0.386705	Yes
IL32	2994	0.252474	0.404091	Yes
SLAMF8	3506	0.239578	0.412284	Yes
CD40	3530	0.239149	0.429048	Yes
IL7R	3564	0.238343	0.445578	Yes
FBP1	3582	0.237608	0.462338	Yes
IL18BP	3596	0.237244	0.479141	Yes
HLA-DQA1	3991	0.226353	0.488447	Yes
STAT1	4104	0.223518	0.50252	Yes
HLA-DRB5	4448	0.214717	0.51189	Yes
LAP3	4969	0.202166	0.517238	Yes
VAMP5	5056	0.200278	0.530101	Yes
LYZ	5178	0.197381	0.542139	Yes
C15orf48	5311	0.194442	0.553772	Yes
SNX10	5921	0.180658	0.556007	Yes
CTSS	7386	0.15282	0.541173	Yes
NCF2	7484	0.1514	0.550333	Yes
ITGB2	7636	0.14866	0.558344	Yes
LCP1	7930	0.144471	0.563552	Yes
CHI3L1	7971	0.143851	0.573174	Yes
SERPINA1	8823	0.129972	0.567505	Yes
CTSC	8865	0.129137	0.576054	Yes
PLEKHO1	9046	0.126425	0.581957	Yes
BASP1	9885	0.113139	0.575309	Yes
MARCO	10117	0.109976	0.579133	Yes
FABP5	11349	0.0948055	0.56424	Yes
TMEM176B	11454	0.0935318	0.569122	Yes
MT2A	11460	0.0934477	0.575743	Yes
TMEM176A	12027	0.0868344	0.572	Yes
CTSH	12121	0.0857431	0.576517	Yes
SOD2	12307	0.083563	0.579255	Yes
ATF5	12311	0.0834651	0.585195	Yes
CLEC2B	12617	0.0799032	0.585555	Yes

## Sheet: Enrichment of RTM_3 signature 
Enrichment of RTM_3 signature genes in responders
SYMBOL	RANK IN GENE LIST	RANK METRIC SCORE	RUNNING ES	CORE ENRICHMENT
GNLY	86	0.64476	0.0420506	Yes
GZMK	123	0.61259	0.0828084	Yes
NKG7	157	0.596387	0.122524	Yes
CD3D	205	0.562258	0.159687	Yes
TRBC1	206	0.561308	0.197614	Yes
CD3G	254	0.533482	0.232833	Yes
IL2RG	280	0.522493	0.267697	Yes
CD7	287	0.520214	0.302742	Yes
CTSW	380	0.486255	0.333976	Yes
TRBC2	415	0.476321	0.365562	Yes
TRAC	427	0.473574	0.397367	Yes
GZMA	446	0.467438	0.428634	Yes
CD52	475	0.45838	0.459113	Yes
CD2	500	0.452181	0.489244	Yes
CCL5	556	0.441388	0.518099	Yes
LTB	582	0.437416	0.547214	Yes
GBP5	608	0.432607	0.576004	Yes
CXCL9	742	0.408843	0.601286	Yes
CST7	781	0.403159	0.627858	Yes
RARRES3	989	0.375781	0.649602	Yes
CD69	1375	0.337611	0.665631	Yes
PTPN7	1489	0.327632	0.685778	Yes
APOBEC3G	1517	0.325048	0.707265	Yes
RAC2	2419	0.274923	0.709967	Yes
CYTIP	2561	0.269067	0.725664	Yes
IL32	2994	0.252474	0.735112	Yes
IL7R	3564	0.238343	0.741192	Yes
PTPRC	4874	0.204378	0.731939	Yes
ACAP1	4884	0.20419	0.745577	Yes
BIRC3	4901	0.203722	0.75906	Yes

## Sheet: Enrichment of RTM_4 signature 
Enrichment of RTM_4 signature genes in responders
SYMBOL	RANK IN GENE LIST	RANK METRIC SCORE	RUNNING ES	CORE ENRICHMENT
CCL18	836	0.395381	0.0339409	Yes
CCL13	1457	0.330644	0.0637191	Yes
C1QA	4362	0.216648	0.0392026	Yes
HLA-DRB5	4448	0.214717	0.0641391	Yes
FGL2	4624	0.210115	0.0869225	Yes
EMB	5500	0.190352	0.0949339	Yes
MPEG1	7028	0.159088	0.0876034	Yes
LGMN	7471	0.15163	0.09848	Yes
MS4A4A	7987	0.143612	0.107083	Yes
GNG2	8001	0.143389	0.124507	Yes
NLRP3	9223	0.123799	0.118226	Yes
MTSS1	9273	0.123114	0.132519	Yes
FKBP5	9836	0.113797	0.136623	Yes
MS4A6A	9868	0.113332	0.150029	Yes
IQGAP2	10171	0.109246	0.158155	Yes
ALDH1A1	10650	0.103361	0.162455	Yes
C3AR1	10907	0.100218	0.170281	Yes
CEBPB	11298	0.0953971	0.175151	Yes
FOLR2	11702	0.0906685	0.17921	Yes
MRC1	12280	0.0838788	0.179365	Yes
SLCO2B1	12396	0.082491	0.187494	Yes
CPVL	12411	0.0823294	0.197383	Yes
ZFP36	12628	0.079788	0.203399	Yes
CD163	12823	0.0777559	0.209552	Yes
